# Supplementary material for: Regulatory dissection of the severe COVID-19 risk locus introgressed by Neanderthals
Source: eLife. 2023 Feb 10;12:e71235. doi: 10.7554/eLife.71235 (PMC9917435; doi:10.7554/eLife.71235)
Supplement: Supplementary file 1. — (a) presents the African samples used as outgroup for our Sprime introgression scan. (b) presents the full results from our Sprime scan. (c) presents Neanderthal matching Sprime segments. (d) presents results from our U and Q95 scan. (e) presents cis-eQTLs from our U and Q95 Scan. (f) presents cis-eQTLs from our Sprime scan. (g) presents trans-eQTLs from our Sprime scan. (h) presents expression of genes responsive to cis-eQTLs within the introgressed region in RNA-seq studies of infection by SARS-CoV-2 and related viruses. (i) presents expression of genes responsive to trans-eQTLs within the introgressed region in RNA-seq studies of infection by SARS-CoV-2 and related viruses. (j) presents data on all MPRA tested variants. (l) presents data from our ChIP-seq analyses. (l) presents our analyses on ChIP-seq data and predicted transcription factor binding sites (TFBS). (m) presents our construct sequences used in transfection studies. [file elife-71235-supp1.xlsx]

## Sheet: Supplementary File 1a
African Samples Used as Outgroup for Sprime Introgression Scan
Illumina_ID	SGDP_ID	Population_ID	Region	Country	Gender
SS6004480	B_Dinka-3	Dinka	Africa	Sudan	M
SS6004470	B_Mandenka-3	Mandenka	Africa	Senegal	M
SS6004471	B_Mbuti-4	Mbuti	Africa	Congo	M
SS6004475	B_Yoruba-3	Yoruba	Africa	Nigeria	M
LP6005443-DNA_E02	S_BantuHerero-1	BantuHerero	Africa	BotswanaOrNamibia	M
LP6005441-DNA_F01	S_BantuHerero-2	BantuHerero	Africa	BotswanaOrNamibia	M
LP6005443-DNA_A01	S_BantuKenya-1	BantuKenya	Africa	Kenya	M
LP6005441-DNA_B02	S_BantuKenya-2	BantuKenya	Africa	Kenya	F
LP6005443-DNA_G02	S_BantuTswana-1	BantuTswana	Africa	BotswanaOrNamibia	M
LP6005443-DNA_F02	S_BantuTswana-2	BantuTswana	Africa	BotswanaOrNamibia	M
LP6005441-DNA_G02	S_Biaka-1	Biaka	Africa	Central African Republic	M
LP6005441-DNA_H02	S_Biaka-2	Biaka	Africa	Central African Republic	M
LP6005443-DNA_H08	S_Dinka-1	Dinka	Africa	Sudan	M
LP6005443-DNA_B09	S_Dinka-2	Dinka	Africa	Sudan	M
LP6005442-DNA_A10	S_Esan-1	Esan	Africa	Nigeria	M
LP6005442-DNA_B10	S_Esan-2	Esan	Africa	Nigeria	F
LP6005442-DNA_G10	S_Gambian-1	Gambian	Africa	Gambia	M
LP6005442-DNA_H10	S_Gambian-2	Gambian	Africa	Gambia	F
LP6005442-DNA_F11	S_Luhya-1	Luhya	Africa	Kenya	F
LP6005442-DNA_E11	S_Luhya-2	Luhya	Africa	Kenya	M
LP6005677-DNA_G01	S_Luo-1	Luo	Africa	Kenya	M
LP6005442-DNA_F09	S_Luo-2	Luo	Africa	Kenya	F
LP6005441-DNA_E07	S_Mandenka-1	Mandenka	Africa	Senegal	M
LP6005441-DNA_F07	S_Mandenka-2	Mandenka	Africa	Senegal	F
LP6005442-DNA_G11	S_Mende-1	Mende	Africa	SierraLeone	M
LP6005442-DNA_H11	S_Mende-2	Mende	Africa	SierraLeone	F
LP6005442-DNA_B02	S_Yoruba-1	Yoruba	Africa	Nigeria	F
LP6005442-DNA_A02	S_Yoruba-2	Yoruba	Africa	Nigeria	M
LP6005592-DNA_C03	S_Mbuti-1	Mbuti	Africa	Congo	M
LP6005441-DNA_B08	S_Mbuti-2	Mbuti	Africa	Congo	F
LP6005441-DNA_A08	S_Mbuti-3	Mbuti	Africa	Congo	M
LP6005519-DNA_A09	S_Kongo-2	Kongo	Africa	Congo	F
LP6005519-DNA_A12	S_Igbo-1	Igbo	Africa	Nigeria	M
LP6005519-DNA_B12	S_Igbo-2	Igbo	Africa	Nigeria	F
LP6005677-DNA_C04	S_Lemande-1	Lemande	Africa	Cameroon	F
LP6005677-DNA_D04	S_Lemande-2	Lemande	Africa	Cameroon	M
All samples come from the SGDP dataset (Mallick et al. 2016)

## Sheet: Supplementary File 1b
Full Results from SPrime Scan
a - Segment ID Number
b - 0 indicates that the introgressed allele is the ref allele; 1 indicates that the introgressed allele is the alt allele
c - Segment score
CHROM	POS	ID	REF	ALT	SEGMENTa	ALLELEb	SCOREc
10	136274	.	C	T	0	1	459670
10	141708	rs191660268	G	A	0	1	459670
10	158101	rs184716443	T	C	0	1	459670
10	159038	.	T	C	0	1	459670
10	162717	rs190092559	T	C	0	1	459670
10	165281	.	T	C	0	1	459670
10	168426	rs182663640	A	G	0	1	459670
10	169683	rs182009495	C	T	0	1	459670
10	171324	.	C	T	0	1	459670
10	172098	rs180679736	T	A	0	1	459670
10	175149	rs185770349	C	T	0	1	459670
10	184616	rs77788690	T	G	0	1	459670
10	188859	rs181316189	A	G	0	1	459670
10	193279	rs181178945	G	T	0	1	459670
10	197167	rs183870808	C	T	0	1	459670
10	198081	rs184676172	G	A	0	1	459670
10	199652	rs78823078	G	T	0	1	459670
10	203133	rs188706543	A	G	0	1	459670
10	213152	rs187773860	T	C	0	1	459670
10	213722	rs188812475	T	A	0	1	459670
10	216183	rs190857035	T	G	0	1	459670
10	216680	rs192788252	A	C	0	1	459670
10	219558	rs183341908	G	C	0	1	459670
10	222329	rs181271453	T	C	0	1	459670
10	222744	rs183801855	T	G	0	1	459670
10	223877	rs191176775	T	G	0	1	459670
10	226224	rs189953203	C	G	0	1	459670
10	232999	rs190601317	C	A	0	1	459670
10	240346	rs183794775	G	C	0	1	459670
10	242319	rs189687802	A	T	0	1	459670
10	245094	rs185344670	T	G	0	1	459670
10	246559	.	A	G	0	1	459670
10	252682	rs189441813	C	T	0	1	459670
10	253367	.	A	G	0	1	459670
10	253508	.	T	C	0	1	459670
10	253690	.	C	A	0	1	459670
10	255249	rs76133258	G	A	0	1	459670
10	257036	rs188408723	G	A	0	1	459670
10	259901	rs189953526	G	A	0	1	459670
10	260588	rs185356505	C	T	0	1	459670
10	261398	rs191922171	A	G	0	1	459670
10	267580	rs193263831	A	G	0	1	459670
10	271017	rs192461201	A	G	0	1	459670
10	272459	rs184404736	T	C	0	1	459670
10	278739	rs191344272	A	G	0	1	459670
10	278811	rs74369402	C	G	0	1	459670
10	281703	rs182357344	A	T	0	1	459670
10	283058	rs193035940	G	C	0	1	459670
10	284938	rs187486561	T	C	0	1	459670
10	285164	.	G	A	0	1	459670
10	285806	rs79391065	A	C	0	1	459670
10	288871	.	T	C	0	1	459670
10	291973	rs181987208	A	G	0	1	459670
10	296056	rs191199847	C	T	0	1	459670
10	296527	.	A	C	0	1	459670
10	298735	rs190584441	G	A	0	1	459670
10	305308	rs186049396	G	C	0	1	459670
10	307765	rs185964188	A	T	0	1	459670
10	308134	rs79145147	T	C	0	1	459670
10	311989	.	C	A	0	1	459670
10	312027	.	A	G	0	1	459670
10	312267	.	C	T	0	1	459670
10	313178	.	C	T	0	1	459670
10	313776	rs182354599	G	A	0	1	459670
10	315717	rs113284007	T	A	0	1	459670
10	317055	.	T	C	0	1	459670
10	318082	.	G	C	0	1	459670
10	320586	.	A	C	0	1	459670
10	320715	.	A	G	0	1	459670
10	321245	rs191085685	G	A	0	1	459670
10	323499	rs144199668	T	G	0	1	459670
10	325123	rs189259750	G	A	0	1	459670
10	325295	rs189995937	G	A	0	1	459670
10	327971	rs78794894	T	C	0	1	459670
10	330864	.	C	T	0	1	459670
10	335913	rs142743928	C	A	0	1	459670
10	343782	rs112539573	G	A	0	1	459670
10	346431	rs189479493	A	G	0	1	459670
10	349398	rs183782963	A	G	0	1	459670
10	352668	rs117948262	C	T	0	1	459670
10	360910	.	G	A	0	1	459670
10	378472	rs189853218	C	A	0	1	459670
10	379821	rs187075307	A	T	0	1	459670
10	384030	rs193267716	G	C	0	1	459670
10	388635	.	G	T	0	1	459670
10	398475	rs185908766	T	C	0	1	459670
10	400455	.	C	A	0	1	459670
10	403543	.	T	C	0	1	459670
10	405183	.	G	A	0	1	459670
10	405293	.	C	T	0	1	459670
10	405606	.	G	C	0	1	459670
10	407788	.	G	A	0	1	459670
10	408467	rs41289247	G	A	0	1	459670
10	409311	.	C	T	0	1	459670
10	409385	rs191711028	T	A	0	1	459670
10	409932	.	G	A	0	1	459670
10	412741	.	T	C	0	1	459670
10	413215	rs374266636	G	C	0	1	459670
10	416598	rs77231513	C	T	0	1	459670
10	417328	rs115045266	T	C	0	1	459670
10	417378	rs76036130	C	T	0	1	459670
10	417429	rs117702703	C	G	0	1	459670
10	417448	rs80161069	A	G	0	1	459670
10	417459	rs116304108	T	C	0	1	459670
10	417777	rs146336966	T	A	0	1	459670
10	418394	rs191577172	C	A	0	1	459670
10	420395	.	A	G	0	1	459670
10	421145	rs182370351	C	T	0	1	459670
10	421171	rs191367041	G	A	0	1	459670
10	422881	rs77299831	G	C	0	1	459670
10	428199	.	G	C	0	1	459670
10	429384	.	G	C	0	1	459670
10	431411	rs117327849	C	T	0	1	459670
10	431504	.	G	A	0	1	459670
10	434761	rs192914714	G	A	0	1	459670
10	434812	rs148723134	G	A	0	1	459670
10	435553	rs192097424	G	A	0	1	459670
10	437434	rs186361443	G	A	0	1	459670
10	438845	.	C	T	0	1	459670
10	441422	.	G	A	0	1	459670
10	441943	.	G	A	0	1	459670
10	442524	rs149569180	C	G	0	1	459670
10	444773	rs192438331	A	C	0	1	459670
10	444910	.	C	T	0	1	459670
10	445422	.	C	T	0	1	459670
10	446242	rs183411691	A	G	0	1	459670
10	446313	.	A	G	0	1	459670
10	455145	.	A	G	0	1	459670
10	457337	rs188260071	G	A	0	1	459670
10	458248	rs186523504	C	T	0	1	459670
10	459187	rs190967996	G	A	0	1	459670
10	460362	.	C	A	0	1	459670
10	460414	rs191363209	A	T	0	1	459670
10	462950	rs182796228	G	A	0	1	459670
10	464947	.	C	T	0	1	459670
10	465449	rs116375811	G	A	0	1	459670
10	465871	.	G	A	0	1	459670
10	466319	.	A	G	0	1	459670
10	467130	rs186279186	G	A	0	1	459670
10	471660	rs188318724	T	C	0	1	459670
10	474216	.	C	G	0	1	459670
10	476615	rs184194587	T	G	0	1	459670
10	478314	.	G	A	0	1	459670
10	481668	rs181592701	G	A	0	1	459670
10	485782	rs113187157	A	C	0	1	459670
10	486156	rs180819553	T	C	0	1	459670
10	486654	rs187143740	C	G	0	1	459670
10	487169	rs187962055	C	A	0	1	459670
10	495252	rs116253295	G	T	0	1	459670
10	501085	rs180684605	G	A	0	1	459670
10	503244	rs78216595	T	G	0	1	459670
10	506801	.	C	T	0	1	459670
10	517313	.	A	G	0	1	459670
10	518082	rs188063511	T	A	0	1	459670
10	520072	.	T	G	0	1	459670
10	521271	rs185696147	T	C	0	1	459670
10	522237	rs187439653	C	G	0	1	459670
10	528145	rs188863515	G	A	0	1	459670
10	530248	.	T	C	0	1	459670
10	533132	.	G	A	0	1	459670
10	545241	rs184634265	T	C	0	1	459670
10	546060	rs180721874	C	T	0	1	459670
10	547117	rs186339675	T	A	0	1	459670
10	550026	.	A	C	0	1	459670
10	550338	rs185464536	G	A	0	1	459670
10	557782	rs138739702	G	C	0	1	459670
10	558056	.	T	C	0	1	459670
10	558209	rs181829601	A	C	0	1	459670
10	559317	.	C	A	0	1	459670
10	561275	rs183225719	T	C	0	1	459670
10	563021	.	T	C	0	1	459670
10	563816	rs189889177	C	T	0	1	459670
10	568224	rs191934078	A	T	0	1	459670
10	569821	.	C	T	0	1	459670
10	571982	rs186461234	G	A	0	1	459670
10	572111	rs186271197	C	T	0	1	459670
10	573120	.	C	G	0	1	459670
10	576719	rs185466396	T	C	0	1	459670
10	577453	rs77481702	G	A	0	1	459670
10	577914	rs186822857	C	T	0	1	459670
10	578237	rs188664024	C	T	0	1	459670
10	586700	.	A	G	0	1	459670
10	589404	rs74683704	A	G	0	1	459670
10	590773	rs182049271	T	C	0	1	459670
10	597851	.	G	A	0	1	459670
10	600507	.	T	C	0	1	459670
10	610705	.	C	T	0	1	459670
10	616302	.	A	G	0	1	459670
10	616643	rs190783840	A	C	0	1	459670
10	620893	rs74379026	G	A	0	1	459670
10	621509	.	C	T	0	1	459670
10	626233	rs190541786	A	C	0	1	459670
10	626549	.	A	G	0	1	459670
10	626962	.	A	G	0	1	459670
10	626984	.	C	A	0	1	459670
10	628973	.	T	C	0	1	459670
10	632326	rs148645354	G	A	0	1	459670
10	635604	rs139153063	G	A	0	1	459670
10	636148	.	G	T	0	1	459670
10	638089	.	C	A	0	1	459670
10	638114	.	T	G	0	1	459670
10	639330	rs184124846	T	C	0	1	459670
10	640731	rs59795392	G	A	0	1	459670
10	641379	rs140214091	T	C	0	1	459670
10	641707	rs186250041	G	C	0	1	459670
10	643645	rs116478412	A	T	0	1	459670
10	646024	rs137961893	A	C	0	1	459670
10	647536	rs75006096	C	G	0	1	459670
10	647908	rs182270953	G	A	0	1	459670
10	648295	rs181594769	A	G	0	1	459670
10	648442	rs117034086	G	A	0	1	459670
10	649630	rs138489115	C	G	0	1	459670
10	651514	rs114300380	T	G	0	1	459670
10	651732	.	G	A	0	1	459670
10	653172	rs117111192	G	A	0	1	459670
10	653541	rs79507093	T	G	0	1	459670
10	653591	rs79973582	C	A	0	1	459670
10	655405	rs147253845	A	G	0	1	459670
10	656590	rs146882669	G	C	0	1	459670
10	657499	rs114536742	C	T	0	1	459670
10	658370	rs117777545	G	C	0	1	459670
10	660060	rs146689200	G	A	0	1	459670
10	662961	.	A	T	0	1	459670
10	664101	rs117847405	G	A	0	1	459670
10	683606	rs187646933	G	C	0	1	459670
10	684783	rs139730087	G	A	0	1	459670
10	688243	.	G	A	0	1	459670
10	695499	.	A	C	0	1	459670
10	696600	rs184197857	C	T	0	1	459670
10	698288	.	G	A	0	1	459670
10	698335	.	G	A	0	1	459670
10	709740	rs45569841	G	A	0	1	459670
10	711375	rs181281330	G	C	0	1	459670
10	713068	.	C	A	0	1	459670
10	716555	.	A	T	0	1	459670
10	719666	.	C	G	0	1	459670
10	720224	rs188216352	A	G	0	1	459670
10	720389	rs192603358	C	G	0	1	459670
10	720475	.	A	G	0	1	459670
10	720510	.	G	A	0	1	459670
10	722495	.	A	G	0	1	459670
10	722781	.	A	C	0	1	459670
10	722980	rs117038614	G	A	0	1	459670
10	723882	.	C	G	0	1	459670
10	725755	.	G	A	0	1	459670
10	725921	rs183015489	A	T	0	1	459670
10	726362	rs147046414	T	C	0	1	459670
10	726522	rs192754675	A	G	0	1	459670
10	729708	.	G	A	0	1	459670
10	729877	rs117634890	T	C	0	1	459670
10	729940	.	C	T	0	1	459670
10	729971	.	A	G	0	1	459670
10	730386	rs181211225	C	A	0	1	459670
10	731278	.	C	A	0	1	459670
10	731342	rs180715608	T	C	0	1	459670
10	731358	.	T	C	0	1	459670
10	732762	.	T	C	0	1	459670
10	733833	.	C	T	0	1	459670
10	737192	rs117242225	G	A	0	1	459670
10	737392	.	G	T	0	1	459670
10	737431	.	C	A	0	1	459670
10	738590	rs117535008	T	C	0	1	459670
10	738664	rs191649600	T	C	0	1	459670
10	738730	.	A	G	0	1	459670
10	738869	rs182891544	G	C	0	1	459670
10	738938	.	G	T	0	1	459670
10	739073	.	A	G	0	1	459670
10	739318	rs117087528	C	T	0	1	459670
10	739450	.	G	A	0	1	459670
10	739480	.	C	T	0	1	459670
10	741317	.	T	C	0	1	459670
10	741364	.	C	T	0	1	459670
10	741673	.	C	T	0	1	459670
10	743286	.	C	T	0	1	459670
10	743783	rs187313409	A	T	0	1	459670
10	743984	.	C	T	0	1	459670
10	744137	.	C	T	0	1	459670
10	744823	.	C	T	0	1	459670
10	744874	.	G	A	0	1	459670
10	745379	rs191230275	A	G	0	1	459670
10	745617	rs191022296	C	T	0	1	459670
10	748055	.	C	T	0	1	459670
10	748491	.	G	A	0	1	459670
10	748512	rs181235485	C	G	0	1	459670
10	748703	rs185183330	C	T	0	1	459670
10	749359	rs191305089	T	C	0	1	459670
10	749760	rs183367819	C	T	0	1	459670
10	751425	rs192080924	G	A	0	1	459670
10	752876	rs55883517	G	C	10	1	288518
10	752898	rs55727503	T	C	10	1	288518
10	753022	rs35865720	G	A	10	1	288518
10	753095	rs35927768	T	C	10	1	288518
10	753200	rs11253329	A	T	10	1	288518
10	753298	rs4579862	A	C	10	1	288518
10	754487	rs7069720	A	G	10	1	288518
10	754731	rs12777155	G	C	10	1	288518
10	755026	rs11253331	T	G	10	1	288518
10	755262	rs11253332	G	C	10	1	288518
10	755932	rs7079450	T	A	10	1	288518
10	756109	rs7092652	G	A	10	1	288518
10	756245	rs7083276	T	C	10	1	288518
10	756358	rs7092976	G	A	10	1	288518
10	756373	rs7092986	G	A	10	1	288518
10	756455	rs7079299	A	G	10	1	288518
10	756673	rs11596346	A	T	10	1	288518
10	756703	rs11595507	C	T	10	1	288518
10	756715	rs11593836	G	A	10	1	288518
10	756757	rs11595510	C	G	10	1	288518
10	756966	rs10904544	A	G	10	1	288518
10	757100	rs10904545	G	A	10	1	288518
10	757222	rs10904546	A	G	10	1	288518
10	757477	rs12356744	G	C	10	1	288518
10	757571	rs12358513	A	G	10	1	288518
10	758991	rs35743076	C	T	10	1	288518
10	759497	rs12359731	T	C	10	1	288518
10	759559	rs11253338	C	T	10	1	288518
10	759640	rs11253339	C	T	10	1	288518
10	760510	rs71489279	T	C	10	1	288518
10	760952	rs36064821	C	T	10	1	288518
10	762288	rs11599917	G	A	10	1	288518
10	763365	rs12356709	A	G	10	1	288518
10	763617	rs12763400	C	T	10	1	288518
10	764545	rs35872126	G	A	10	1	288518
10	764683	rs35117541	C	T	10	1	288518
10	764786	rs11253340	G	T	10	1	288518
10	765008	rs11253341	G	C	10	1	288518
10	765072	rs11253342	A	G	10	1	288518
10	765117	rs11253343	C	T	10	1	288518
10	765162	rs11253344	C	T	10	1	288518
10	765313	rs11253346	A	G	10	1	288518
10	765675	rs12357016	C	T	10	1	288518
10	765739	rs12357995	T	C	10	1	288518
10	765769	rs11253347	A	G	10	1	288518
10	765800	rs34490091	A	C	10	1	288518
10	765852	rs11253348	C	T	10	1	288518
10	765897	rs11253349	C	G	10	1	288518
10	765968	rs11253350	G	A	10	1	288518
10	766283	rs10904547	C	T	10	1	288518
10	766598	rs11253352	C	A	10	1	288518
10	766862	rs11253353	C	A	10	1	288518
10	768367	rs11253355	C	G	10	1	288518
10	770979	rs11253362	C	A	10	1	288518
10	771870	rs12782447	C	T	10	1	288518
10	778770	rs17293517	C	T	10	1	288518
10	787740	rs10904555	C	A	10	1	288518
10	787852	rs11253388	A	G	10	1	288518
10	788678	rs11253390	A	G	10	1	288518
10	788752	rs11253391	G	A	10	1	288518
10	788768	rs11253392	G	A	10	1	288518
10	788824	rs11253393	G	T	10	1	288518
10	788840	rs11253394	G	A	10	1	288518
10	788884	rs11253395	C	A	10	1	288518
10	789754	rs11253396	C	T	10	1	288518
10	789774	rs11253397	A	G	10	1	288518
10	790484	rs35342920	T	C	10	1	288518
10	791306	rs112642444	C	G	10	1	288518
10	791431	rs112396209	G	A	10	1	288518
10	791747	rs71491311	G	A	10	1	288518
10	791868	rs34367686	G	C	10	1	288518
10	792050	rs34848170	A	G	10	1	288518
10	792060	rs11253401	C	T	10	1	288518
10	792344	rs11253403	C	T	10	1	288518
10	792527	rs34051950	G	A	10	1	288518
10	792834	rs377480599	A	C	10	1	288518
10	795606	rs138344155	A	G	10	1	288518
10	796297	rs11253406	G	A	10	1	288518
10	796374	rs11253408	T	C	10	1	288518
10	796468	rs12357999	A	C	10	1	288518
10	796865	rs34778553	T	C	10	1	288518
10	797490	rs10904557	T	C	10	1	288518
10	800181	rs34383514	T	C	10	1	288518
10	800539	rs11595385	A	G	10	1	288518
10	805825	rs11253419	G	A	10	1	288518
10	806369	rs11253420	A	G	10	1	288518
10	806988	rs11253421	G	C	10	1	288518
10	813426	rs11253424	C	T	10	1	288518
10	815173	rs11253425	G	A	10	1	288518
10	819459	rs10904564	C	G	10	1	288518
10	819991	rs10904565	G	T	10	1	288518
10	822757	rs7072970	G	A	10	1	288518
10	827957	rs11253440	C	T	10	1	288518
10	828288	rs11253441	A	G	10	1	288518
10	831004	rs117174830	C	T	10	1	288518
10	1768121	rs74627049	T	C	86	1	110177
10	1769113	rs77306508	A	G	86	1	110177
10	1769868	rs78064449	A	G	86	1	110177
10	1771388	rs117498659	C	T	86	1	110177
10	1772705	rs75570272	G	A	86	1	110177
10	1775569	rs78252391	G	A	86	1	110177
10	1778063	rs75196694	A	G	86	1	110177
10	1779139	rs117110448	A	G	86	1	110177
10	1779553	rs3750682	C	T	86	1	110177
10	1788401	rs182678128	G	A	86	1	110177
10	1799906	rs118067474	G	A	86	1	110177
10	1804579	rs17156884	C	T	86	1	110177
10	1807668	rs78508050	A	C	86	1	110177
10	1810808	rs368063458	C	A	86	1	110177
10	1814952	rs75279869	C	A	86	1	110177
10	1822879	rs76708630	A	C	86	1	110177
10	1824338	rs17156908	C	T	86	1	110177
10	1825081	rs76879391	A	C	86	1	110177
10	1825092	rs17156911	G	C	86	1	110177
10	1825865	rs143674355	T	C	86	1	110177
10	1825902	rs148107407	G	A	86	1	110177
10	1942152	rs34167775	C	A	34	1	175799
10	1942624	rs7080590	C	G	34	1	175799
10	1942800	rs7067990	T	C	34	1	175799
10	1950425	rs12777609	C	T	34	1	175799
10	1950974	rs55683811	G	A	34	1	175799
10	1951239	rs72770650	G	T	34	1	175799
10	1953369	rs74939635	G	T	34	1	175799
10	1953981	rs12773455	G	C	34	1	175799
10	1956528	rs35748942	T	C	34	1	175799
10	1960079	rs34668708	C	A	34	1	175799
10	1966096	rs12766442	G	A	34	1	175799
10	1972170	rs72770674	T	C	34	1	175799
10	1976996	rs12776278	G	C	34	1	175799
10	1978262	rs12765700	C	T	34	1	175799
10	1982996	rs12783397	A	G	34	1	175799
10	1983341	rs12762467	G	A	34	1	175799
10	1984207	rs12768970	G	A	34	1	175799
10	1985367	rs12783644	T	C	34	1	175799
10	1988620	rs7918640	T	C	34	1	175799
10	1993899	rs34791225	T	G	34	1	175799
10	1996026	rs12773461	T	G	34	1	175799
10	1996059	rs12767607	C	T	34	1	175799
10	1996127	rs56098087	G	A	34	1	175799
10	1997186	rs35172979	T	C	34	1	175799
10	1997562	rs35053711	G	A	34	1	175799
10	1998862	rs34666974	G	A	34	1	175799
10	1999205	rs35578085	G	A	34	1	175799
10	1999396	rs35548759	G	A	34	1	175799
10	2000001	rs12781550	G	T	34	1	175799
10	2000500	rs72772249	T	C	34	1	175799
10	2008662	rs72772268	A	C	34	1	175799
10	2008789	rs72772270	T	A	34	1	175799
10	2009012	rs72772271	T	G	34	1	175799
10	2009758	rs72772275	A	G	34	1	175799
10	2009795	rs72772276	A	C	34	1	175799
10	2009944	rs72772278	A	G	34	1	175799
10	2010024	rs72772279	A	G	34	1	175799
10	2010122	rs72772280	A	G	34	1	175799
10	2010134	rs72772281	T	C	34	1	175799
10	2010221	rs72772282	C	T	34	1	175799
10	2010373	rs55890831	T	A	34	1	175799
10	2010434	rs56231410	T	C	34	1	175799
10	2010785	rs55775319	C	T	34	1	175799
10	2011125	rs72772285	G	A	34	1	175799
10	2019169	rs7901867	G	T	34	1	175799
10	2028350	rs72774221	G	T	34	1	175799
10	2030558	rs72774224	C	G	34	1	175799
10	2035575	rs72774226	C	G	34	1	175799
10	2037273	rs72478243	G	A	34	1	175799
10	2040560	rs72774231	G	A	34	1	175799
10	2040692	rs72774233	T	A	34	1	175799
10	2041230	rs7094741	T	A	34	1	175799
10	2041261	rs72774234	A	G	34	1	175799
10	2043160	rs55868498	G	C	34	1	175799
10	2044014	rs72774237	G	T	34	1	175799
10	2044397	rs56057450	C	T	34	1	175799
10	2044992	rs72774238	C	T	34	1	175799
10	2045858	rs72774241	T	C	34	1	175799
10	2046580	rs7081668	A	G	34	1	175799
10	2048559	rs72774244	C	T	34	1	175799
10	2050535	rs72774247	A	G	34	1	175799
10	2051356	rs7083610	T	C	34	1	175799
10	2051384	rs72776204	C	T	34	1	175799
10	2053460	rs72776207	A	G	34	1	175799
10	2053662	rs72776208	C	G	34	1	175799
10	2053738	rs72776209	G	A	34	1	175799
10	2054695	rs72776210	G	A	34	1	175799
10	2055028	rs72776211	T	C	34	1	175799
10	2056161	rs72776213	G	A	34	1	175799
10	2056262	rs72776214	T	C	34	1	175799
10	2057948	rs72776217	C	G	34	1	175799
10	2066758	rs72776226	A	G	34	1	175799
10	2075421	rs200440030	T	C	34	1	175799
10	2075912	rs72776241	C	T	34	1	175799
10	2078872	rs72776247	G	A	34	1	175799
10	2086128	rs72776273	G	T	34	1	175799
10	2092641	rs72776285	T	C	34	1	175799
10	2526219	rs184249019	C	A	27	1	197454
10	2528420	rs373028594	G	T	27	1	197454
10	2533696	.	T	G	27	1	197454
10	2536500	rs189102085	A	G	27	1	197454
10	2539747	rs369617988	G	C	27	1	197454
10	2547962	rs189011394	A	C	27	1	197454
10	2551549	rs370538845	C	T	27	1	197454
10	2551775	rs373679504	G	A	27	1	197454
10	2552223	rs190734080	T	A	27	1	197454
10	2557113	rs151228095	C	T	27	1	197454
10	2559983	rs192131775	T	A	27	1	197454
10	2563232	rs371795267	G	C	27	1	197454
10	2567178	rs188361277	C	T	27	1	197454
10	2567753	rs377030672	C	G	27	1	197454
10	2578467	.	T	A	27	1	197454
10	2579812	rs139464043	T	C	27	1	197454
10	2581548	rs185353182	A	C	27	1	197454
10	2583277	rs188241200	C	T	27	1	197454
10	2584515	rs184856514	G	A	27	1	197454
10	2585835	rs181645180	A	C	27	1	197454
10	2585901	rs139220467	C	G	27	1	197454
10	2586009	rs143583030	A	G	27	1	197454
10	2586856	rs367704905	T	A	27	1	197454
10	2586992	rs374970918	C	T	27	1	197454
10	2587007	rs187625568	C	G	27	1	197454
10	2588626	rs144216798	T	C	27	1	197454
10	2589132	rs186342206	C	T	27	1	197454
10	2592000	rs144199858	T	C	27	1	197454
10	2592909	rs376907825	A	G	27	1	197454
10	2593526	rs186705229	C	T	27	1	197454
10	2593872	rs191564511	G	A	27	1	197454
10	2594931	rs140992031	T	C	27	1	197454
10	2596666	rs185213462	C	T	27	1	197454
10	2596873	rs188214590	G	A	27	1	197454
10	2597465	rs139011668	A	C	27	1	197454
10	2598615	rs187867549	C	T	27	1	197454
10	2598868	rs186837834	A	G	27	1	197454
10	2599157	rs192934382	T	C	27	1	197454
10	2599507	rs147047919	T	C	27	1	197454
10	2599860	rs188756156	T	C	27	1	197454
10	2601129	rs183776603	G	T	27	1	197454
10	2601234	rs139821382	C	G	27	1	197454
10	2601309	rs186634561	A	G	27	1	197454
10	2601368	rs143240318	A	G	27	1	197454
10	2601383	rs150361415	G	A	27	1	197454
10	2601631	rs373350957	T	C	27	1	197454
10	2601707	rs190906545	A	C	27	1	197454
10	2601850	rs182072950	C	T	27	1	197454
10	2602119	rs148333916	G	C	27	1	197454
10	2602148	rs141516223	G	T	27	1	197454
10	2602161	.	A	G	27	1	197454
10	2602235	rs150865646	T	A	27	1	197454
10	2602825	rs183656130	G	T	27	1	197454
10	2602923	rs189538970	G	A	27	1	197454
10	2603217	rs117136385	C	T	27	1	197454
10	2603307	rs146160263	A	C	27	1	197454
10	2603424	rs139802897	G	A	27	1	197454
10	2603434	rs180976493	C	T	27	1	197454
10	2603460	rs143205147	A	G	27	1	197454
10	2603483	rs144492512	T	C	27	1	197454
10	2603560	rs148442148	G	A	27	1	197454
10	2603954	rs189753176	G	C	27	1	197454
10	2605194	rs182741329	T	A	27	1	197454
10	2608861	rs142203380	G	T	27	1	197454
10	2609234	rs141643621	A	G	27	1	197454
10	2613211	rs147384336	G	T	27	1	197454
10	2614963	rs189086221	T	C	27	1	197454
10	2616114	rs181943696	T	G	27	1	197454
10	2617114	rs186333213	G	A	27	1	197454
10	2618755	rs370889761	A	C	27	1	197454
10	2618876	rs187147410	T	C	27	1	197454
10	2619025	.	C	A	27	1	197454
10	2625459	rs141116092	A	G	27	1	197454
10	2627261	rs146267159	C	T	27	1	197454
10	2629976	rs370833139	C	A	27	1	197454
10	2630935	rs192739060	G	A	27	1	197454
10	2632546	rs138026087	G	A	27	1	197454
10	2634525	rs143115370	T	C	27	1	197454
10	2653631	.	G	A	27	1	197454
10	2903359	rs12783642	A	G	14	1	268923
10	2903936	rs71475886	T	G	14	1	268923
10	2904055	rs117601961	A	T	14	1	268923
10	2905940	rs12771961	G	C	14	1	268923
10	2907769	rs117694056	C	T	14	1	268923
10	2908653	rs144203935	C	T	14	1	268923
10	2908908	rs148743978	T	C	14	1	268923
10	2909050	rs141790845	C	T	14	1	268923
10	2909286	rs145534294	T	C	14	1	268923
10	2909344	rs116976308	G	T	14	1	268923
10	2909373	rs17195548	G	A	14	1	268923
10	2909457	rs17280619	G	A	14	1	268923
10	2909558	rs118157444	T	C	14	1	268923
10	2909866	rs76294596	T	C	14	1	268923
10	2910056	rs76804385	T	C	14	1	268923
10	2910353	rs141294965	G	A	14	1	268923
10	2910378	rs150796420	A	G	14	1	268923
10	2910633	rs117245867	A	C	14	1	268923
10	2910849	rs1909688	A	G	14	1	268923
10	2911422	rs148798153	C	T	14	1	268923
10	2911623	rs17195604	T	C	14	1	268923
10	2912617	rs17195625	A	G	14	1	268923
10	2912730	rs117249756	A	G	14	1	268923
10	2912823	rs80313298	G	T	14	1	268923
10	2913054	rs147448844	C	T	14	1	268923
10	2914685	rs143992845	C	A	14	1	268923
10	2914897	rs140794476	T	G	14	1	268923
10	2914919	rs151165997	A	C	14	1	268923
10	2915006	rs140331274	T	C	14	1	268923
10	2915131	rs147037449	A	C	14	1	268923
10	2916156	rs118017267	T	A	14	1	268923
10	2916915	rs144555579	A	G	14	1	268923
10	2917096	rs17280724	T	A	14	1	268923
10	2917152	rs118148713	C	T	14	1	268923
10	2917398	rs142622800	A	G	14	1	268923
10	2917919	rs117793606	G	C	14	1	268923
10	2919107	rs149917436	T	A	14	1	268923
10	2919776	rs142204312	A	T	14	1	268923
10	2920522	rs117272544	T	C	14	1	268923
10	2920565	rs75761747	A	T	14	1	268923
10	2921243	rs142981630	A	G	14	1	268923
10	2921402	rs117785693	G	C	14	1	268923
10	2921466	rs117964068	C	T	14	1	268923
10	2922047	rs148414005	T	C	14	1	268923
10	2922064	rs141620978	C	T	14	1	268923
10	2922842	rs117179966	G	T	14	1	268923
10	2923838	rs117459297	T	C	14	1	268923
10	2927306	rs137966906	G	A	14	1	268923
10	2927549	rs148692308	A	T	14	1	268923
10	2930091	rs117368864	T	C	14	1	268923
10	2931744	rs188895874	C	T	14	1	268923
10	2936012	rs147481681	C	T	14	1	268923
10	2946896	rs79282375	G	A	14	1	268923
10	2957878	rs74845889	G	A	14	1	268923
10	2957939	rs117655057	C	T	14	1	268923
10	2958726	rs190866093	C	T	14	1	268923
10	2959612	rs117928509	C	A	14	1	268923
10	2959954	rs75752677	A	T	14	1	268923
10	2960068	rs149345189	C	A	14	1	268923
10	2960279	rs76526059	G	A	14	1	268923
10	2960583	rs78191961	T	C	14	1	268923
10	2960865	rs117976843	G	A	14	1	268923
10	2961595	rs78533673	T	G	14	1	268923
10	2961883	rs186104756	T	C	14	1	268923
10	2961908	rs118002132	G	T	14	1	268923
10	2961944	rs75549710	C	T	14	1	268923
10	2962539	rs78242080	T	C	14	1	268923
10	2963601	rs117621341	A	G	14	1	268923
10	2963878	rs140948161	T	C	14	1	268923
10	2964099	rs75395369	T	C	14	1	268923
10	2964220	rs184494019	C	T	14	1	268923
10	2965554	rs117680327	C	T	14	1	268923
10	2967528	rs74523052	T	C	14	1	268923
10	2970513	rs77035123	C	A	14	1	268923
10	3100437	rs17212411	C	T	56	1	141392
10	3101325	rs12763781	A	G	56	1	141392
10	3102000	rs35117327	T	G	56	1	141392
10	3106239	rs77322928	C	T	56	1	141392
10	3106281	rs76039948	T	C	56	1	141392
10	3107307	rs71477806	G	A	56	1	141392
10	3107338	rs34882494	T	A	56	1	141392
10	3107539	rs12762013	T	A	56	1	141392
10	3107607	rs12780595	C	T	56	1	141392
10	3107745	rs35363509	C	T	56	1	141392
10	3107796	rs35301243	C	T	56	1	141392
10	3107896	rs12779561	G	C	56	1	141392
10	3108213	rs79483948	G	T	56	1	141392
10	3108420	rs80333075	A	G	56	1	141392
10	3108507	rs79027905	C	G	56	1	141392
10	3111685	rs74504363	G	A	56	1	141392
10	3111797	rs78195233	T	C	56	1	141392
10	3112575	rs41288711	G	A	56	1	141392
10	3112709	rs17284739	A	G	56	1	141392
10	3112944	rs78021546	T	C	56	1	141392
10	3113176	rs80322866	G	C	56	1	141392
10	3113232	rs78882784	T	C	56	1	141392
10	3113362	rs113154165	C	T	56	1	141392
10	3113386	rs75366957	C	T	56	1	141392
10	3113450	rs117061561	T	C	56	1	141392
10	3114288	rs113204860	T	G	56	1	141392
10	3118835	rs74383941	T	C	56	1	141392
10	3118937	rs79634637	G	A	56	1	141392
10	3121320	rs72778561	C	T	56	1	141392
10	3128438	rs72778571	G	A	56	1	141392
10	3131564	rs11595530	G	C	56	1	141392
10	3131652	rs11591423	C	T	56	1	141392
10	3132515	rs11591990	C	G	56	1	141392
10	3228515	rs61829262	G	A	79	1	112948
10	3229670	rs141736350	T	C	79	1	112948
10	3230808	rs61829267	G	A	79	1	112948
10	3231614	rs78207995	A	G	79	1	112948
10	3232207	rs61829268	T	C	79	1	112948
10	3232584	rs36116530	T	C	79	1	112948
10	3236406	rs61829294	A	T	79	1	112948
10	3241051	rs61829299	T	C	79	1	112948
10	3241312	rs61829301	C	T	79	1	112948
10	3242724	rs149405671	G	T	79	1	112948
10	3242831	rs61829302	C	T	79	1	112948
10	3245194	rs61829303	G	A	79	1	112948
10	3247077	rs61829304	G	T	79	1	112948
10	3250454	rs61829306	C	T	79	1	112948
10	3252350	rs61829307	T	C	79	1	112948
10	3253116	rs61829308	G	A	79	1	112948
10	3255813	rs61829309	C	A	79	1	112948
10	3256014	rs61829310	G	A	79	1	112948
10	3256840	rs61829311	G	A	79	1	112948
10	3258685	rs61829312	C	G	79	1	112948
10	3259744	rs144952830	C	G	79	1	112948
10	3260255	rs76526184	C	T	79	1	112948
10	3260400	rs117160785	A	G	79	1	112948
10	3260765	rs61829334	C	G	79	1	112948
10	3264446	rs61829336	T	C	79	1	112948
10	3265669	rs61829337	C	T	79	1	112948
10	3271229	rs61829338	G	A	79	1	112948
10	3717925	rs72767166	A	G	7	1	351976
10	3724018	rs61831080	A	T	7	1	351976
10	3730833	rs61831082	C	T	7	1	351976
10	3732349	rs61831084	G	A	7	1	351976
10	3733586	rs61831085	G	T	7	1	351976
10	3735779	rs61831086	A	G	7	1	351976
10	3738772	rs61831087	C	T	7	1	351976
10	3742761	rs61831103	T	C	7	1	351976
10	3746026	rs61831107	A	C	7	1	351976
10	3747035	rs2129444	A	G	7	1	351976
10	3748979	rs61831109	G	A	7	1	351976
10	3750887	rs61831110	C	A	7	1	351976
10	3752397	rs61831114	T	A	7	1	351976
10	3753131	rs61831115	A	G	7	1	351976
10	3754249	rs61831118	C	T	7	1	351976
10	3754729	rs72769306	G	T	7	1	351976
10	3754753	rs72769307	A	T	7	1	351976
10	3754958	rs61831119	C	T	7	1	351976
10	3755020	rs72769309	A	T	7	1	351976
10	3755632	rs61831125	T	C	7	1	351976
10	3756238	rs61831126	C	A	7	1	351976
10	3757044	rs61831127	C	T	7	1	351976
10	3757387	rs61831128	A	C	7	1	351976
10	3758356	rs61831129	G	A	7	1	351976
10	3758719	rs72769316	A	G	7	1	351976
10	3760874	rs61831130	G	T	7	1	351976
10	3761821	rs61831131	A	G	7	1	351976
10	3762018	.	G	A	7	1	351976
10	3763585	rs61831133	C	A	7	1	351976
10	3763602	rs61831134	C	T	7	1	351976
10	3763815	rs61831135	G	A	7	1	351976
10	3766756	rs61831153	C	A	7	1	351976
10	3766794	rs61831154	G	C	7	1	351976
10	3768876	rs61831158	A	G	7	1	351976
10	3768966	rs72769341	T	G	7	1	351976
10	3768994	rs61831159	T	C	7	1	351976
10	3770581	rs79201692	A	G	7	1	351976
10	3772581	rs17326134	T	C	7	1	351976
10	3772915	rs72769348	C	T	7	1	351976
10	3774026	rs61832160	A	C	7	1	351976
10	3776801	rs72769354	G	A	7	1	351976
10	3782525	rs72769357	T	C	7	1	351976
10	3787568	rs61829681	A	G	7	1	351976
10	3792676	rs11252068	C	T	7	1	351976
10	3794127	rs11252069	A	G	7	1	351976
10	3794205	rs12218020	G	A	7	1	351976
10	3796544	rs72769375	C	T	7	1	351976
10	3798204	rs72769377	G	A	7	1	351976
10	3799547	rs1872750	T	C	7	1	351976
10	3799594	rs1872751	G	A	7	1	351976
10	3799694	rs72769381	C	T	7	1	351976
10	3799725	rs72769382	G	A	7	1	351976
10	3800076	rs17327128	C	G	7	1	351976
10	3800525	rs72769385	A	C	7	1	351976
10	3801127	rs72769386	T	G	7	1	351976
10	3804257	rs10508264	G	A	7	1	351976
10	3805018	rs1872755	G	T	7	1	351976
10	3808352	rs7069366	G	A	7	1	351976
10	3809383	rs72769389	C	G	7	1	351976
10	3809685	rs72769390	T	G	7	1	351976
10	3810499	rs11252078	T	C	7	1	351976
10	3810770	rs11252079	G	A	7	1	351976
10	3811212	rs11252080	A	G	7	1	351976
10	3811244	rs11252081	T	G	7	1	351976
10	3816851	rs2129438	T	C	7	1	351976
10	3817515	rs11252088	C	T	7	1	351976
10	3820114	rs112407993	G	T	7	1	351976
10	3823188	rs12414935	C	G	7	1	351976
10	3823531	rs3829201	G	A	7	1	351976
10	3825801	rs3793919	C	T	7	1	351976
10	3829186	rs9633755	C	G	7	1	351976
10	3829469	rs11252093	T	C	7	1	351976
10	3829996	rs11252094	G	A	7	1	351976
10	3830346	rs11252095	C	G	7	1	351976
10	3831656	rs11252096	A	G	7	1	351976
10	3831690	rs11252097	G	C	7	1	351976
10	3831768	rs11252098	T	C	7	1	351976
10	3832665	rs72771208	T	A	7	1	351976
10	3833267	rs11252099	C	G	7	1	351976
10	3833286	rs11252100	C	T	7	1	351976
10	3833498	rs72771210	T	C	7	1	351976
10	3833674	rs11252101	A	G	7	1	351976
10	3834164	rs7083745	G	A	7	1	351976
10	3834285	rs7084883	C	T	7	1	351976
10	3835352	rs72771214	G	A	7	1	351976
10	3836471	rs11595251	A	G	7	1	351976
10	3836585	rs11597255	G	A	7	1	351976
10	3836803	rs72771216	G	A	7	1	351976
10	3837173	rs11596255	T	G	7	1	351976
10	3837740	rs11593708	C	A	7	1	351976
10	3837766	rs5006151	C	T	7	1	351976
10	3837807	rs5006153	A	G	7	1	351976
10	3837857	rs5006154	A	G	7	1	351976
10	3838216	rs1872756	C	T	7	1	351976
10	3838791	rs72771219	G	A	7	1	351976
10	3841480	rs11592875	C	T	7	1	351976
10	3842780	rs72771222	A	G	7	1	351976
10	3845365	rs1872757	T	C	7	1	351976
10	3849583	rs11593360	G	C	7	1	351976
10	3849608	rs11597781	C	A	7	1	351976
10	3850303	rs17135848	G	T	7	1	351976
10	3856481	rs72478256	C	G	7	1	351976
10	3862173	rs55980471	C	G	7	1	351976
10	3862933	rs72771259	C	T	7	1	351976
10	3863901	rs17328824	G	A	7	1	351976
10	3864071	rs72771263	G	A	7	1	351976
10	3865793	rs17250304	G	C	7	1	351976
10	4007895	rs117707919	G	A	82	1	111595
10	4011083	rs11252215	C	G	82	1	111595
10	4011133	rs11252216	C	T	82	1	111595
10	4013542	rs79648474	T	C	82	1	111595
10	4013780	rs186259184	C	G	82	1	111595
10	4014062	rs139042537	C	T	82	1	111595
10	4014218	rs76814493	T	C	82	1	111595
10	4021270	rs11252233	C	T	82	1	111595
10	4022085	rs11252234	C	T	82	1	111595
10	4023041	rs146354078	A	C	82	1	111595
10	4023207	rs118035988	A	T	82	1	111595
10	4032981	rs11252247	C	T	82	1	111595
10	4035789	rs12219589	G	C	82	1	111595
10	4036699	rs11252248	T	C	82	1	111595
10	4036734	rs10430774	A	T	82	1	111595
10	4041203	rs12219136	T	G	82	1	111595
10	4043046	rs11252251	C	T	82	1	111595
10	4043569	rs11252253	G	A	82	1	111595
10	4044831	rs11252255	A	C	82	1	111595
10	4044841	rs11252256	G	A	82	1	111595
10	4049104	rs117741437	C	T	82	1	111595
10	4051440	rs11252262	G	A	82	1	111595
10	4053579	.	G	C	82	1	111595
10	4058890	rs11252269	G	A	82	1	111595
10	4062011	rs11252272	C	G	82	1	111595
10	4063986	rs8181281	G	A	82	1	111595
10	4065762	rs11252278	C	T	82	1	111595
10	4067888	rs188303563	C	T	60	1	136694
10	4068881	rs11252282	A	G	82	1	111595
10	4070931	rs182876519	A	G	60	1	136694
10	4071645	.	C	T	60	1	136694
10	4072540	rs192826160	C	T	60	1	136694
10	4072955	rs189649172	C	G	60	1	136694
10	4073131	.	C	G	60	1	136694
10	4073160	.	T	C	60	1	136694
10	4074612	.	G	A	60	1	136694
10	4075558	.	G	A	60	1	136694
10	4075626	.	C	G	60	1	136694
10	4076073	rs117046307	G	A	82	1	111595
10	4078748	rs139814451	A	G	82	1	111595
10	4079497	.	A	T	60	1	136694
10	4079878	rs11252289	T	G	82	1	111595
10	4082026	rs181379746	T	A	60	1	136694
10	4082500	rs192110000	G	A	60	1	136694
10	4082966	rs147863317	G	A	82	1	111595
10	4085244	.	T	A	60	1	136694
10	4085648	rs183942353	T	C	60	1	136694
10	4085783	rs191128666	T	C	60	1	136694
10	4088804	rs74980275	G	A	60	1	136694
10	4088942	rs74117024	T	A	60	1	136694
10	4089105	rs60276471	G	C	60	1	136694
10	4089373	.	G	A	60	1	136694
10	4089718	rs60943116	A	G	60	1	136694
10	4090200	rs11252296	C	T	82	1	111595
10	4090201	rs182341319	G	A	60	1	136694
10	4094089	rs11252299	T	G	82	1	111595
10	4103226	rs79145429	A	G	82	1	111595
10	4104019	rs148790886	C	T	82	1	111595
10	4104226	rs141167816	G	T	82	1	111595
10	4104856	rs11252310	G	A	82	1	111595
10	4105632	.	C	T	60	1	136694
10	4106063	.	A	T	60	1	136694
10	4107131	rs117420465	C	T	82	1	111595
10	4107471	rs117108864	A	G	82	1	111595
10	4108021	rs191028527	C	T	82	1	111595
10	4118428	.	C	T	60	1	136694
10	4130877	.	T	C	60	1	136694
10	4135779	.	G	A	60	1	136694
10	4155115	.	T	A	60	1	136694
10	4157747	.	T	A	60	1	136694
10	4168649	.	T	C	60	1	136694
10	4170130	.	G	A	60	1	136694
10	4188803	.	T	C	60	1	136694
10	4202094	.	C	T	60	1	136694
10	4208114	.	T	A	60	1	136694
10	4209603	rs75633603	C	T	60	1	136694
10	4209678	rs77041538	T	G	60	1	136694
10	4209714	.	T	G	60	1	136694
10	4212465	.	A	T	60	1	136694
10	4218629	.	G	C	60	1	136694
10	5118322	rs6601899	A	C	87	0	109959
10	5118842	rs7071638	G	C	87	0	109959
10	5121872	rs4881397	A	T	87	0	109959
10	5122570	rs2398186	T	C	87	0	109959
10	5124755	rs10904411	T	C	87	0	109959
10	5126044	rs7893549	A	G	87	0	109959
10	5129121	rs10795244	A	G	87	0	109959
10	5133140	rs2211624	C	G	87	0	109959
10	5134511	rs1937847	A	C	87	0	109959
10	5138036	rs2518049	A	G	87	0	109959
10	5144599	rs10904419	T	C	87	0	109959
10	5151565	rs4880710	G	A	87	0	109959
10	5152162	rs7077842	T	C	87	0	109959
10	5152680	rs7914117	G	A	87	0	109959
10	5157896	rs4622159	T	C	87	0	109959
10	5160499	rs10752005	T	C	87	0	109959
10	5162308	rs7920135	A	T	87	0	109959
10	5168690	rs4881403	G	A	87	0	109959
10	5180220	rs7893669	T	C	87	0	109959
10	5196119	rs1781929	C	T	87	0	109959
10	5196273	rs1781930	A	G	87	0	109959
10	5199216	rs1761603	T	C	87	0	109959
10	5206185	rs4330990	T	C	87	1	109959
10	5207683	rs61854684	A	G	87	1	109959
10	5213252	rs61854687	G	A	87	1	109959
10	5214467	rs61854697	A	G	87	1	109959
10	5217302	rs140101821	T	A	87	1	109959
10	5218654	rs138206919	C	G	87	1	109959
10	5218947	rs146763988	A	G	87	1	109959
10	5220427	rs377076644	T	G	87	1	109959
10	5221921	rs145508990	C	A	87	1	109959
10	5221988	rs7084630	G	A	87	1	109959
10	5234161	rs61854731	A	G	87	1	109959
10	5234406	rs76848149	G	A	87	1	109959
10	5238020	rs76656738	T	G	87	1	109959
10	5238272	rs3812616	T	C	87	1	109959
10	5239300	rs17134523	T	C	87	1	109959
10	5239706	rs7074004	T	G	87	1	109959
10	5239824	rs7087111	C	T	87	1	109959
10	5239958	rs7070862	A	T	87	1	109959
10	5241472	rs61854738	A	G	87	1	109959
10	5245780	rs76669111	G	T	87	1	109959
10	5246085	rs17134531	G	A	87	1	109959
10	5246125	rs77697233	C	T	87	1	109959
10	5247098	rs17134533	G	A	87	1	109959
10	5247376	rs3750572	T	C	87	1	109959
10	5247631	rs3750568	G	A	87	1	109959
10	5247701	rs7921838	G	A	87	1	109959
10	5247784	rs3829125	C	G	87	1	109959
10	5251482	rs7893850	A	G	87	1	109959
10	5251702	rs7908297	G	A	87	1	109959
10	5252013	rs117310669	C	G	87	1	109959
10	5252077	rs4424574	G	T	87	1	109959
10	5252838	rs7477114	G	T	87	1	109959
10	5252866	rs7475279	A	C	87	1	109959
10	5252902	rs7475281	A	C	87	1	109959
10	5253638	rs7078211	A	G	87	1	109959
10	5254146	rs6601927	A	G	87	1	109959
10	5254188	rs7897431	G	A	87	1	109959
10	5254820	rs4098025	A	C	87	1	109959
10	5254847	rs1832007	A	G	87	1	109959
10	5256272	rs17134585	T	C	87	1	109959
10	5256497	rs17134588	G	A	87	1	109959
10	5256758	rs77503049	C	T	87	1	109959
10	5256834	rs76551580	T	C	87	1	109959
10	5257097	rs78585347	G	T	87	1	109959
10	5257797	rs78686304	C	T	87	1	109959
10	5257941	rs7912751	C	T	87	1	109959
10	5260682	rs17134592	C	G	87	1	109959
10	5261101	rs75811842	A	G	87	1	109959
10	5261111	rs76494948	C	T	87	1	109959
10	5261175	rs17134601	A	G	87	1	109959
10	5261226	rs77353068	G	C	87	1	109959
10	5261256	rs17134604	T	A	87	1	109959
10	5261491	rs77896903	C	T	87	1	109959
10	5261576	rs80264034	T	A	87	1	109959
10	5261683	rs74404998	A	G	87	1	109959
10	5261829	rs117849125	C	T	87	1	109959
10	5261910	rs17134607	G	A	87	1	109959
10	5262019	rs17134608	G	A	87	1	109959
10	5262096	rs79849481	G	A	87	1	109959
10	5262136	rs77355283	C	T	87	1	109959
10	5262267	rs79717793	G	A	87	1	109959
10	5262490	rs78231592	G	C	87	1	109959
10	5262512	rs75529951	G	A	87	1	109959
10	5262822	rs143690051	C	T	87	1	109959
10	5262883	rs112455458	G	C	87	1	109959
10	5263461	rs17134616	A	T	87	1	109959
10	5263494	rs75413156	C	A	87	1	109959
10	5263516	rs80011059	A	T	87	1	109959
10	5267191	rs140107293	A	G	87	1	109959
10	5270301	rs143431627	C	T	87	1	109959
10	5284557	rs7897822	G	A	87	1	109959
10	5634260	rs77142884	C	A	76	1	115748
10	5635366	rs150942384	A	G	76	1	115748
10	5635459	rs150168412	G	A	76	1	115748
10	5635729	rs145041277	G	A	76	1	115748
10	5636590	rs77639378	G	T	76	1	115748
10	5642214	rs17137747	T	C	76	1	115748
10	5648659	rs78542929	T	C	76	1	115748
10	5649026	rs76264079	T	G	76	1	115748
10	5649050	rs75557502	A	G	76	1	115748
10	5649411	rs117430395	C	G	76	1	115748
10	5649719	rs117089852	G	A	76	1	115748
10	5651358	rs60879535	T	C	76	1	115748
10	5651553	rs11254968	A	G	76	1	115748
10	5651721	rs11254973	A	G	76	1	115748
10	5652869	rs11255033	A	T	76	1	115748
10	5653086	rs11255036	T	C	76	1	115748
10	5653110	rs11255038	A	G	76	1	115748
10	5654134	rs11255075	C	T	76	1	115748
10	5663330	rs11255587	G	A	76	1	115748
10	5663500	rs11255592	G	A	76	1	115748
10	5665020	rs117151416	C	T	76	1	115748
10	5666576	rs11255736	G	C	76	1	115748
10	5669490	rs11255947	C	T	76	1	115748
10	5674421	rs17142061	G	A	76	1	115748
10	5678838	rs11256331	G	C	76	1	115748
10	5682098	rs41290335	G	A	76	1	115748
10	5682284	rs41290339	A	G	76	1	115748
10	5682342	rs17142275	G	A	76	1	115748
10	5685535	rs12354690	A	T	76	1	115748
10	5687984	rs11256767	C	T	76	1	115748
10	5697984	rs11257244	T	G	76	1	115748
10	5699876	rs11257371	C	T	76	1	115748
10	6128456	rs75781374	G	A	85	1	111368
10	6128870	rs75556354	G	A	85	1	111368
10	6134152	rs111632675	T	G	85	1	111368
10	6138552	rs79869779	A	G	85	1	111368
10	6148058	rs200046563	A	C	85	1	111368
10	6151169	rs78693596	A	G	85	1	111368
10	6153466	rs188699622	C	T	85	1	111368
10	6153743	rs113507336	A	T	85	1	111368
10	6155566	rs79655939	G	A	85	1	111368
10	6158386	rs74945871	C	T	85	1	111368
10	6161556	rs113856641	C	G	85	1	111368
10	6168856	rs192056147	C	A	85	1	111368
10	6169851	rs112176212	A	G	85	1	111368
10	6177077	rs143729055	G	A	85	1	111368
10	6177383	.	A	G	85	1	111368
10	6178648	rs74899614	G	C	85	1	111368
10	6178910	rs80021589	C	T	85	1	111368
10	6179299	rs79177790	A	G	85	1	111368
10	6182749	rs75715082	G	T	85	1	111368
10	6183500	rs74939166	C	A	85	1	111368
10	6196543	rs187271587	C	T	85	1	111368
10	6207233	rs181641966	C	T	85	1	111368
10	6209689	rs79401430	A	C	85	1	111368
10	6212490	rs192525827	G	A	85	1	111368
10	6217686	rs141898937	A	G	85	1	111368
10	6734411	rs11254083	T	G	68	1	124123
10	6735854	rs11254093	A	G	68	1	124123
10	6737505	rs10795407	T	C	68	1	124123
10	6742893	rs7916191	C	G	68	1	124123
10	6743328	rs1410136	G	A	68	1	124123
10	6743726	rs11254134	C	T	68	1	124123
10	6747937	rs2039031	G	A	68	1	124123
10	6749638	rs10795423	C	T	68	1	124123
10	6752124	rs72638715	A	C	68	1	124123
10	6755304	rs10795426	C	T	68	1	124123
10	6756830	rs28628857	A	G	68	1	124123
10	6762403	rs11597924	A	G	68	1	124123
10	6762683	rs10904825	C	T	68	1	124123
10	6768337	rs11254270	A	G	68	1	124123
10	6768836	rs11254272	T	G	68	1	124123
10	6769297	rs17395064	A	G	68	1	124123
10	6776179	rs10904860	A	G	68	1	124123
10	6784704	rs11596755	T	C	68	1	124123
10	6784934	rs12359476	G	A	68	1	124123
10	6791034	rs7094310	C	G	68	1	124123
10	6794969	rs11254422	G	A	68	1	124123
10	6795454	rs11254430	G	A	68	1	124123
10	6805486	rs11254492	G	A	68	1	124123
10	6806370	rs11254495	G	A	68	1	124123
10	6807730	rs77618436	T	C	68	1	124123
10	6809952	rs11595220	G	A	68	1	124123
10	6813662	rs7909562	C	T	68	1	124123
10	6821947	rs10795490	A	G	68	1	124123
10	6823182	rs11254607	T	C	68	1	124123
10	6825499	rs76708816	A	G	68	1	124123
10	6825915	rs12569366	A	C	68	1	124123
10	6830962	rs10904966	A	G	68	1	124123
10	6834150	rs79464579	A	C	68	1	124123
10	6836687	rs2387742	C	T	68	1	124123
10	6842973	rs150423277	G	A	68	1	124123
10	6848278	rs150479517	T	A	68	1	124123
10	6850891	rs118018894	A	C	68	1	124123
10	6852077	rs77592302	C	T	68	1	124123
10	6852441	rs11596811	G	A	68	1	124123
10	6854785	rs17141856	A	G	68	1	124123
10	6864177	rs78571007	C	T	68	1	124123
10	6866734	rs190156012	G	A	68	1	124123
10	6867637	rs75516698	G	A	68	1	124123
10	6872627	rs35180044	C	T	68	1	124123
10	6883850	rs61051551	C	T	68	1	124123
10	6899176	rs78786401	T	C	68	1	124123
10	6900094	rs78725475	T	C	68	1	124123
10	6900179	rs74698834	T	C	68	1	124123
10	6903383	.	A	C	68	1	124123
10	6903690	.	A	G	68	1	124123
10	6903718	rs187815545	T	C	68	1	124123
10	6911375	rs76363192	T	C	68	1	124123
10	6911735	rs75403209	T	C	68	1	124123
10	6912619	rs77889388	A	G	68	1	124123
10	6914322	rs471285	G	C	68	1	124123
10	6921066	rs2791409	T	C	68	1	124123
10	6921335	rs2584865	C	T	68	1	124123
10	6922340	rs2791408	A	G	68	1	124123
10	6926178	rs572318	C	T	68	1	124123
10	6937190	rs2490671	T	C	68	1	124123
10	6939944	rs2490681	C	T	68	1	124123
10	6940303	rs2791407	C	T	68	1	124123
10	6941159	rs2804139	T	A	68	1	124123
10	6941749	rs2039832	T	C	68	1	124123
10	6942681	rs2791405	A	G	68	1	124123
10	6947263	rs2486878	T	C	68	1	124123
10	6966044	rs4748538	T	C	68	1	124123
10	6967041	rs61846248	T	C	68	1	124123
10	6967389	rs61846249	T	C	68	1	124123
10	6972009	rs10905067	C	T	68	1	124123
10	6977055	rs10905069	A	G	68	1	124123
10	6977250	rs10905070	A	G	68	1	124123
10	6993899	rs17319884	G	A	68	1	124123
10	6999169	rs11254902	C	G	68	1	124123
10	6999234	rs12359617	A	C	68	1	124123
10	6999348	rs11254903	C	T	68	1	124123
10	7002323	rs11254904	A	C	68	1	124123
10	7004207	rs4747370	T	C	68	1	124123
10	7006748	rs72638719	C	G	68	1	124123
10	7006767	rs72638720	A	G	68	1	124123
10	7006869	rs72638721	A	C	68	1	124123
10	7007171	rs2066051	C	T	68	1	124123
10	7007226	rs2066052	G	A	68	1	124123
10	7007284	rs2066053	G	A	68	1	124123
10	7008441	rs72638722	T	A	68	1	124123
10	7008464	rs72638723	C	G	68	1	124123
10	7008503	rs72638724	T	G	68	1	124123
10	7010787	rs117350442	C	T	68	1	124123
10	7011900	rs60807863	G	C	68	1	124123
10	7013767	rs12415164	G	A	68	1	124123
10	7014834	rs12415536	G	T	68	1	124123
10	7014917	rs12415542	G	A	68	1	124123
10	7015223	rs17142304	A	G	68	1	124123
10	7015236	rs36121457	T	C	68	1	124123
10	7015440	rs12415884	G	A	68	1	124123
10	7015844	rs17142309	T	A	68	1	124123
10	7018237	rs17142314	G	A	68	1	124123
10	7018398	rs72638725	G	A	68	1	124123
10	7020181	rs72638726	A	G	68	1	124123
10	7021289	rs72638727	G	T	68	1	124123
10	7021694	rs72638728	T	C	68	1	124123
10	7022815	rs17142323	G	A	68	1	124123
10	7024379	rs72638729	T	C	68	1	124123
10	7024705	rs72638730	T	C	68	1	124123
10	7025150	rs72638731	C	T	68	1	124123
10	7035006	rs4459190	T	C	68	1	124123
10	7036986	rs72638732	T	C	68	1	124123
10	7037112	rs2185138	T	G	68	1	124123
10	7037826	rs72638733	T	C	68	1	124123
10	7039093	rs12415847	T	C	68	1	124123
10	7040305	rs72638734	C	T	68	1	124123
10	7043252	rs72638735	T	C	68	1	124123
10	7160410	rs140158999	A	G	90	1	108271
10	7161394	rs61836671	A	G	90	1	108271
10	7161708	rs7916297	C	T	90	1	108271
10	7162177	rs11255011	A	G	90	1	108271
10	7162197	rs11255012	G	C	90	1	108271
10	7163565	rs61836685	A	G	90	1	108271
10	7163693	rs17142520	G	A	90	1	108271
10	7165087	rs10508324	C	G	90	1	108271
10	7167804	rs11255015	A	T	90	1	108271
10	7168313	rs11255018	C	T	90	1	108271
10	7168623	rs58598902	G	T	90	1	108271
10	7168833	rs59605795	G	A	90	1	108271
10	7170511	rs61836689	G	T	90	1	108271
10	7171522	rs117536870	T	G	90	1	108271
10	7171878	rs61836691	A	G	90	1	108271
10	7172747	rs12220424	C	T	90	1	108271
10	7228552	rs113414258	A	G	3	1	388009
10	7238481	rs17332285	C	T	3	1	388009
10	7241301	rs77336971	C	T	3	1	388009
10	7243647	rs77814620	C	T	3	1	388009
10	7249839	rs17332760	T	C	3	1	388009
10	7249891	rs17332795	C	T	3	1	388009
10	7250283	rs1998594	A	G	3	1	388009
10	7251877	rs74407570	T	C	3	1	388009
10	7251902	rs79286042	A	G	3	1	388009
10	7253803	rs77639622	A	G	3	1	388009
10	7255825	rs34515352	G	A	3	1	388009
10	7258096	rs75238088	G	A	3	1	388009
10	7259799	rs78373135	C	G	3	1	388009
10	7260284	rs80167205	G	A	3	1	388009
10	7272902	rs76252122	C	A	3	1	388009
10	7276622	rs79692779	G	C	3	1	388009
10	7280667	rs75176021	C	T	3	1	388009
10	7283980	rs75049075	A	G	3	1	388009
10	7288110	rs1123287	G	A	3	1	388009
10	7293898	rs80018624	A	T	3	1	388009
10	7294285	rs77593076	A	G	3	1	388009
10	7295570	rs78050974	C	T	3	1	388009
10	7296341	rs75903875	T	C	3	1	388009
10	7297973	rs76358607	A	G	3	1	388009
10	7299769	rs77567294	T	C	3	1	388009
10	7300910	rs79371265	G	T	3	1	388009
10	7302523	rs78984016	T	C	3	1	388009
10	7302615	rs77437920	C	T	3	1	388009
10	7302676	rs74789705	C	T	3	1	388009
10	7303816	rs77702760	T	C	3	1	388009
10	7303893	rs75933790	C	T	3	1	388009
10	7303906	rs79371916	T	C	3	1	388009
10	7304107	rs117391065	T	C	3	1	388009
10	7304126	rs144912570	T	C	3	1	388009
10	7304197	rs76908953	G	T	3	1	388009
10	7304395	rs78474067	A	G	3	1	388009
10	7321242	rs61834650	T	C	3	1	388009
10	7326235	rs61834651	C	T	3	1	388009
10	7327202	rs41290263	T	C	3	1	388009
10	7331930	rs79518940	C	T	3	1	388009
10	7337689	rs17425718	G	A	3	1	388009
10	7337974	rs55824097	C	T	3	1	388009
10	7344512	rs17334706	C	G	3	1	388009
10	7346488	rs17425824	A	G	3	1	388009
10	7351721	rs61837676	G	A	3	1	388009
10	7354684	rs17334831	G	A	3	1	388009
10	7355343	rs72775533	G	A	3	1	388009
10	7368192	rs61837677	A	G	3	1	388009
10	7370571	rs61837678	G	C	3	1	388009
10	7371244	rs61837679	T	C	3	1	388009
10	7371695	rs72775542	G	C	3	1	388009
10	7373318	rs61837680	G	A	3	1	388009
10	7376033	rs72775545	C	G	3	1	388009
10	7376822	rs56390707	A	T	3	1	388009
10	7384170	rs61837682	T	C	3	1	388009
10	7386148	rs74913709	A	G	3	1	388009
10	7387823	rs61837686	C	T	3	1	388009
10	7389714	rs61837689	T	C	3	1	388009
10	7390147	rs1749362	T	C	3	1	388009
10	7390214	rs1749361	G	A	3	1	388009
10	7396993	rs2767694	A	G	3	1	388009
10	7397288	rs667617	T	G	3	1	388009
10	7397837	rs545686	T	C	3	1	388009
10	7398800	rs684903	T	C	3	1	388009
10	7399153	rs490818	G	A	3	1	388009
10	7399361	rs606477	G	A	3	1	388009
10	7399836	rs484300	C	T	3	1	388009
10	7402299	rs650291	C	T	3	1	388009
10	7405529	rs1172702	C	T	3	1	388009
10	7405550	rs1183010	C	T	3	1	388009
10	7410589	rs4748862	A	G	3	0	388009
10	7412903	rs4748871	C	T	3	0	388009
10	7421834	rs10737020	C	T	3	0	388009
10	7423984	rs2254760	G	T	3	0	388009
10	7425121	rs2254890	G	C	3	0	388009
10	7425407	rs2254910	G	A	3	0	388009
10	7427068	rs2255142	T	C	3	0	388009
10	7427482	rs2255252	C	A	3	0	388009
10	7427677	rs2477537	C	T	3	0	388009
10	7429610	rs72775564	A	G	3	1	388009
10	7431475	rs72775570	G	A	3	1	388009
10	7431730	rs72775571	A	G	3	1	388009
10	7432554	rs11255104	T	C	3	1	388009
10	7433830	rs11255105	T	C	3	1	388009
10	7434167	rs72775572	T	C	3	1	388009
10	7435488	rs72775574	G	A	3	1	388009
10	7437062	rs113093589	C	A	3	1	388009
10	7437605	rs11255109	T	G	3	1	388009
10	7438500	rs11255110	T	C	3	1	388009
10	7438672	rs112946550	T	C	3	1	388009
10	7439725	rs11255111	G	A	3	1	388009
10	7442105	rs72775578	T	C	3	1	388009
10	7442832	rs11255113	C	T	3	1	388009
10	7443890	rs11255114	T	C	3	1	388009
10	7444453	rs11255115	C	G	3	1	388009
10	7445578	rs11255116	T	C	3	1	388009
10	7447629	rs12360187	A	C	3	1	388009
10	7448826	rs72775583	A	T	3	1	388009
10	7449571	rs72775584	G	A	3	1	388009
10	7450111	rs56281736	G	A	3	1	388009
10	7450229	rs56402297	G	A	3	1	388009
10	7450854	rs72775586	C	G	3	1	388009
10	7450891	rs72775587	G	A	3	1	388009
10	7459870	rs79037315	T	C	3	1	388009
10	7461888	rs76865115	A	T	3	1	388009
10	7461955	rs113765123	T	C	3	1	388009
10	7462560	rs111698340	T	C	3	1	388009
10	7463224	rs76966787	C	G	3	1	388009
10	7467634	rs17163	G	C	3	1	388009
10	7471925	rs79759421	A	C	3	1	388009
10	7472091	rs74814373	A	T	3	1	388009
10	7484007	rs143000713	C	T	3	1	388009
10	7488092	rs117041409	C	T	3	1	388009
10	7498061	rs117929882	T	C	3	1	388009
10	7507500	rs117764615	G	T	3	1	388009
10	7509170	rs11255146	C	T	3	1	388009
10	7511396	rs10905162	C	A	3	1	388009
10	7511603	rs11255149	T	C	3	1	388009
10	7511681	rs11255150	C	T	3	1	388009
10	7511824	rs11255151	G	A	3	1	388009
10	7511963	rs79162317	G	A	3	1	388009
10	7511976	rs79783535	C	A	3	1	388009
10	7513617	rs77098141	A	G	3	1	388009
10	7518177	rs11255161	G	A	3	1	388009
10	7519002	rs139815960	A	G	3	1	388009
10	7519579	rs79235281	T	A	3	1	388009
10	7520555	rs35805121	T	C	3	1	388009
10	7520633	rs74513508	G	A	3	1	388009
10	7523750	rs117676446	C	T	3	1	388009
10	7527613	rs74315794	T	C	3	1	388009
10	7528546	rs78844792	G	T	3	1	388009
10	7533795	rs111425905	T	C	3	1	388009
10	7535694	rs75300747	G	T	3	1	388009
10	7536428	rs113514097	C	T	3	1	388009
10	7536619	rs111502498	G	C	3	1	388009
10	7536661	rs74910027	C	T	3	1	388009
10	7537176	rs77604842	G	T	3	1	388009
10	7537474	rs11596661	T	G	3	1	388009
10	7543139	rs76366241	G	A	3	1	388009
10	7546676	rs111252618	C	T	3	1	388009
10	7906995	rs111862412	G	A	16	1	256400
10	7908825	rs113581865	C	T	16	1	256400
10	7909126	rs112710590	G	T	16	1	256400
10	7912815	rs76715011	G	T	16	1	256400
10	7913229	rs113329426	T	C	16	1	256400
10	7922167	rs112252408	C	G	16	1	256400
10	7925539	rs111369524	C	G	16	1	256400
10	7928789	rs113952777	C	A	16	1	256400
10	7931709	rs112120363	G	A	16	1	256400
10	7933334	rs78313733	A	T	16	1	256400
10	7939502	rs113948596	C	T	16	1	256400
10	7940039	rs113808455	C	T	16	1	256400
10	7941322	rs113085587	C	T	16	1	256400
10	7941766	rs111256238	A	G	16	1	256400
10	7943692	rs74317482	T	G	16	1	256400
10	7944356	.	A	T	16	1	256400
10	7945947	rs111940203	G	A	16	1	256400
10	7953910	rs111338770	C	A	16	1	256400
10	7954170	rs113455164	G	A	16	1	256400
10	7955868	rs79233740	A	G	16	1	256400
10	7960208	rs111827447	C	T	16	1	256400
10	7962690	rs112680096	T	A	16	1	256400
10	7970955	rs79904846	G	A	16	1	256400
10	7971720	rs113820359	G	A	16	1	256400
10	7972126	rs112239493	C	T	16	1	256400
10	7973629	rs79684362	G	A	16	1	256400
10	7975232	rs149155274	G	C	16	1	256400
10	7976352	rs77121524	C	T	16	1	256400
10	7976590	rs112630087	T	C	16	1	256400
10	7976897	rs113425826	T	C	16	1	256400
10	7980326	rs112643569	T	C	16	1	256400
10	7981287	rs80104768	G	A	16	1	256400
10	7989380	rs111432401	G	T	16	1	256400
10	7989792	rs78444561	C	T	16	1	256400
10	7997606	rs112040644	A	C	16	1	256400
10	7999487	rs113837510	C	A	16	1	256400
10	8000712	rs113371444	G	A	16	1	256400
10	8004282	rs113062403	A	G	16	1	256400
10	8004924	rs112637324	A	G	16	1	256400
10	8012383	rs111372573	G	T	16	1	256400
10	8015038	rs75924294	C	G	16	1	256400
10	8021549	rs79302279	T	C	16	1	256400
10	8023425	rs78515857	T	C	16	1	256400
10	8024105	rs79425017	T	G	16	1	256400
10	8033390	rs79928831	T	C	16	1	256400
10	8050917	rs76960858	G	T	16	1	256400
10	8063177	rs74230016	G	A	16	1	256400
10	8064026	rs76163105	T	C	16	1	256400
10	8070496	rs35053934	C	A	16	1	256400
10	8073124	rs12771626	C	T	16	1	256400
10	8073685	rs71481753	A	T	16	1	256400
10	8087792	rs35421083	G	T	16	1	256400
10	8090296	rs34737531	C	T	16	1	256400
10	8103645	rs35915743	G	A	16	1	256400
10	8105449	rs34640685	C	T	16	1	256400
10	8109582	rs3929763	C	T	16	1	256400
10	8110641	rs144964375	G	A	16	1	256400
10	8118063	rs111400702	C	G	16	1	256400
10	8118493	rs113881286	C	T	16	1	256400
10	8120718	rs35278622	C	T	16	1	256400
10	8122827	rs12780816	G	A	16	1	256400
10	8123093	rs10508341	G	A	16	1	256400
10	8123209	rs34185938	C	T	16	1	256400
10	8125784	rs3814677	C	G	16	1	256400
10	8129677	rs112972838	C	A	16	1	256400
10	8132148	rs111951871	C	T	16	1	256400
10	8135477	rs113845194	T	C	16	1	256400
10	8136568	rs80117848	A	C	16	1	256400
10	8139751	rs80093646	G	C	16	1	256400
10	8139796	rs75626700	C	G	16	1	256400
10	8151497	rs75444419	C	A	16	1	256400
10	8152489	rs79298926	C	T	16	1	256400
10	8155746	rs78380386	C	T	16	1	256400
10	8156557	rs11596723	C	A	16	1	256400
10	8173345	rs35393440	G	A	16	1	256400
10	8176656	rs11598100	G	T	16	1	256400
10	8189671	rs77623024	C	T	16	1	256400
10	8191566	rs78573777	C	T	16	1	256400
10	8191938	rs76237978	T	C	16	1	256400
10	8192172	rs80089822	C	T	16	1	256400
10	8193390	rs4749660	G	A	16	1	256400
10	8195039	rs79551343	T	C	16	1	256400
10	8195244	rs75445407	A	T	16	1	256400
10	8195916	rs113004054	G	C	16	1	256400
10	8195949	rs17376570	T	C	16	1	256400
10	8197938	rs112255861	G	A	16	1	256400
10	8198190	rs79328229	C	T	16	1	256400
10	8206606	rs17449373	T	C	16	1	256400
10	8209705	rs4749667	C	T	16	1	256400
10	8211507	rs11595823	A	G	16	1	256400
10	8212212	rs925308	T	A	16	1	256400
10	8213721	rs79694956	C	T	16	1	256400
10	8214705	rs77991746	C	T	16	1	256400
10	8215531	rs77603728	C	G	16	1	256400
10	8216712	rs11599087	A	T	16	1	256400
10	8217511	rs112286794	G	A	16	1	256400
10	8219488	rs4749675	T	C	16	1	256400
10	8220884	rs4747749	A	G	16	1	256400
10	8221658	rs112591670	C	T	16	1	256400
10	8221691	rs147950758	G	A	16	1	256400
10	8221798	rs113839996	T	C	16	1	256400
10	8221833	rs113162215	A	T	16	1	256400
10	8222048	rs113697874	G	A	16	1	256400
10	8222155	rs112953895	T	C	16	1	256400
10	8222212	rs10508344	G	A	16	1	256400
10	8223080	rs1509968	C	T	16	1	256400
10	8223279	rs1509970	G	A	16	1	256400
10	8224191	rs17450067	G	A	16	1	256400
10	8224261	rs17450095	T	G	16	1	256400
10	8232835	rs78260602	G	A	16	1	256400
10	8236079	rs11595490	A	C	16	1	256400
10	8249058	rs78136104	G	T	16	1	256400
10	8251068	rs78782799	A	C	16	1	256400
10	8251419	rs17450983	T	G	16	1	256400
10	8252895	rs17378984	G	A	16	1	256400
10	8255499	rs111848233	G	A	16	1	256400
10	8257147	rs17379115	A	G	16	1	256400
10	8258786	rs17464052	C	A	16	1	256400
10	8259519	rs17379424	G	A	16	1	256400
10	8260821	rs17379473	G	A	16	1	256400
10	8263404	rs1779625	A	G	16	1	256400
10	8266475	rs1243933	G	T	16	1	256400
10	8282297	rs1796856	G	A	16	1	256400
10	8301652	rs1419295	A	G	16	1	256400
10	8301720	rs1416559	T	C	16	1	256400
10	8302602	rs77040413	T	C	16	1	256400
10	8303050	rs75138795	C	T	16	1	256400
10	8306727	rs79733574	G	A	16	1	256400
10	8307003	rs111354643	T	A	16	1	256400
10	8307514	rs112992304	G	A	16	1	256400
10	8321068	rs7069034	G	T	16	1	256400
10	8324943	rs78592156	T	C	16	1	256400
10	8327988	rs112015478	A	G	16	1	256400
10	8330863	rs11594186	G	A	16	1	256400
10	8331674	rs77838082	A	G	16	1	256400
10	8331960	rs76121601	C	T	16	1	256400
10	8341932	rs11594660	G	A	16	1	256400
10	8342571	rs7923299	C	T	16	1	256400
10	8348749	rs112796792	G	A	16	1	256400
10	8349453	rs75063615	A	G	16	1	256400
10	8349980	rs140897956	A	G	16	1	256400
10	8350538	rs75740069	A	C	16	1	256400
10	8352787	rs78732843	T	C	16	1	256400
10	8353553	rs74351024	C	T	16	1	256400
10	8354681	rs78921566	T	C	16	1	256400
10	8355509	rs11597980	A	C	16	1	256400
10	8355679	rs11598012	A	G	16	1	256400
10	8356075	rs80169617	G	A	16	1	256400
10	8356132	rs76247713	T	C	16	1	256400
10	8357248	rs75958701	T	C	16	1	256400
10	8357295	rs113405442	A	G	16	1	256400
10	8360016	rs78237796	A	G	16	1	256400
10	8360691	rs116976934	G	T	16	1	256400
10	10632512	rs116984349	T	G	51	1	148088
10	10633729	rs117082262	G	A	51	1	148088
10	10638411	rs117134625	G	A	51	1	148088
10	10640455	rs116999193	G	A	51	1	148088
10	10643040	rs116918722	C	T	51	1	148088
10	10647320	rs117989460	A	C	51	1	148088
10	10650148	rs116965133	G	T	51	1	148088
10	10651245	rs117553316	T	G	51	1	148088
10	10651825	rs117043274	G	A	51	1	148088
10	10657203	rs117884281	G	A	51	1	148088
10	10659465	rs117791043	T	G	51	1	148088
10	10669828	rs117667353	A	T	51	1	148088
10	10670464	rs118071131	T	C	51	1	148088
10	10677525	rs116932766	G	A	51	1	148088
10	10679563	rs117901915	C	T	51	1	148088
10	10682231	rs117869066	G	T	51	1	148088
10	10685686	rs117763531	C	G	51	1	148088
10	10687496	rs117480093	A	G	51	1	148088
10	10692050	rs184481003	G	A	51	1	148088
10	10692412	rs117756520	G	C	51	1	148088
10	10704382	rs117595555	C	T	51	1	148088
10	10715339	rs117464607	G	A	51	1	148088
10	10715600	rs118072768	T	C	51	1	148088
10	10716604	rs192164159	G	A	51	1	148088
10	10717041	rs146033937	T	C	51	1	148088
10	10723734	rs117186028	T	C	51	1	148088
10	10724869	rs117772216	T	C	51	1	148088
10	10724883	rs138747198	G	A	51	1	148088
10	10727196	rs117263683	T	C	51	1	148088
10	10727832	rs116981580	G	A	51	1	148088
10	10728435	rs117657610	G	C	51	1	148088
10	10728820	rs117800499	C	A	51	1	148088
10	10729194	rs117823863	C	T	51	1	148088
10	10729407	rs142732062	C	A	51	1	148088
10	10729648	rs190236050	G	T	51	1	148088
10	10729691	rs182048470	C	T	51	1	148088
10	10729718	rs117953879	A	G	51	1	148088
10	10731239	rs189850201	G	A	51	1	148088
10	10731656	rs117952626	G	T	51	1	148088
10	10731800	rs117862963	C	A	51	1	148088
10	10731860	rs117326599	C	A	51	1	148088
10	10731887	rs117663937	T	C	51	1	148088
10	10732234	rs117084355	G	C	51	1	148088
10	10732366	rs118033028	C	T	51	1	148088
10	10732485	rs117900906	A	T	51	1	148088
10	10732522	rs117370038	C	A	51	1	148088
10	10733562	.	T	G	51	1	148088
10	10735890	.	A	C	51	1	148088
10	10736411	.	G	A	51	1	148088
10	10738807	.	C	T	51	1	148088
10	10739170	rs118161707	T	C	51	1	148088
10	10739223	rs118071255	G	A	51	1	148088
10	10739503	rs117820160	C	T	51	1	148088
10	10739993	rs7903832	G	A	51	1	148088
10	10740026	rs7924300	T	C	51	1	148088
10	10740082	rs117861717	G	A	51	1	148088
10	10740296	rs118109537	G	A	51	1	148088
10	10740687	rs117293489	G	A	51	1	148088
10	10741360	rs117444188	C	A	51	1	148088
10	10741596	rs117625631	G	A	51	1	148088
10	10741817	rs117203436	C	G	51	1	148088
10	10741997	rs116910858	C	T	51	1	148088
10	10742351	rs146834202	A	C	51	1	148088
10	10742410	rs150481984	C	T	51	1	148088
10	10742758	rs116950950	C	G	51	1	148088
10	10742928	rs117216815	C	G	51	1	148088
10	10743238	rs117610722	A	G	51	1	148088
10	10743288	rs116979537	C	T	51	1	148088
10	10743307	rs117319823	C	T	51	1	148088
10	10756780	rs117573660	G	A	51	1	148088
10	10758112	rs117279672	T	C	51	1	148088
10	10764194	rs139512580	G	T	51	1	148088
10	10765896	rs117790612	G	C	51	1	148088
10	10767250	rs117607754	G	A	51	1	148088
10	10767624	.	T	C	51	1	148088
10	10770526	rs118041973	G	T	51	1	148088
10	10775163	rs150952056	C	T	51	1	148088
10	10977464	rs150347689	G	A	13	1	270974
10	10981965	rs142910029	G	A	13	1	270974
10	10982084	.	G	A	13	1	270974
10	10983047	rs144397891	G	A	13	1	270974
10	10983189	rs143622578	G	T	13	1	270974
10	10985638	rs144748058	T	G	13	1	270974
10	10987123	rs143022817	C	T	13	1	270974
10	10989732	rs139985428	C	G	13	1	270974
10	10993998	rs145519717	G	A	13	1	270974
10	10996967	.	T	G	13	1	270974
10	10999726	rs147943323	C	T	13	1	270974
10	10999919	rs145416815	G	A	13	1	270974
10	11000523	.	G	A	13	1	270974
10	11002118	.	C	T	13	1	270974
10	11002567	.	T	C	13	1	270974
10	11004287	.	T	C	13	1	270974
10	11004330	.	C	T	13	1	270974
10	11005174	.	G	A	13	1	270974
10	11009222	.	A	C	13	1	270974
10	11010495	.	G	T	13	1	270974
10	11013201	.	C	T	13	1	270974
10	11014178	.	A	T	13	1	270974
10	11014212	.	A	G	13	1	270974
10	11015579	rs182158000	G	T	13	1	270974
10	11018061	rs138687140	T	C	13	1	270974
10	11019273	rs146377286	T	G	13	1	270974
10	11020586	.	A	G	13	1	270974
10	11020637	.	T	C	13	1	270974
10	11020801	.	T	C	13	1	270974
10	11021054	.	C	G	13	1	270974
10	11021732	rs372632434	G	A	13	1	270974
10	11021949	.	T	C	13	1	270974
10	11022853	.	T	C	13	1	270974
10	11023042	.	T	G	13	1	270974
10	11023389	.	T	A	13	1	270974
10	11023546	.	A	G	13	1	270974
10	11023655	rs188922642	A	C	13	1	270974
10	11025293	.	G	A	13	1	270974
10	11026444	rs145594947	G	A	13	1	270974
10	11028415	rs142910151	C	T	13	1	270974
10	11030821	.	A	G	13	1	270974
10	11031068	rs139188623	G	A	13	1	270974
10	11032552	.	G	A	13	1	270974
10	11033922	.	C	G	13	1	270974
10	11035501	rs148446627	A	G	13	1	270974
10	11036290	rs190970771	T	C	13	1	270974
10	11037247	.	A	C	13	1	270974
10	11037912	rs149895235	C	A	13	1	270974
10	11039419	rs186449331	C	T	13	1	270974
10	11040746	rs192642309	A	T	13	1	270974
10	11042611	.	G	C	13	1	270974
10	11043426	.	A	G	13	1	270974
10	11044102	.	C	T	13	1	270974
10	11045674	.	A	G	13	1	270974
10	11048486	.	G	A	13	1	270974
10	11049579	.	G	A	13	1	270974
10	11050108	.	C	A	13	1	270974
10	11056861	rs138011209	G	A	13	1	270974
10	11057874	rs188079503	G	A	13	1	270974
10	11064143	rs186350423	G	A	13	1	270974
10	11066828	.	T	C	13	1	270974
10	11068650	rs147638355	A	G	13	1	270974
10	11072030	rs149736229	T	C	13	1	270974
10	11073602	.	C	T	13	1	270974
10	11075382	rs186774626	G	A	13	1	270974
10	11078254	rs144573348	G	A	13	1	270974
10	11081464	rs187572305	C	T	13	1	270974
10	11081625	rs150346218	A	G	13	1	270974
10	11086952	.	T	C	13	1	270974
10	11088622	.	G	A	13	1	270974
10	11090464	rs186939466	G	A	13	1	270974
10	11092010	.	A	G	13	1	270974
10	11098544	rs142710726	T	C	13	1	270974
10	11098556	rs146945313	A	G	13	1	270974
10	11099746	.	A	T	13	1	270974
10	11104308	.	A	G	13	1	270974
10	11105192	rs139003580	G	A	13	1	270974
10	11107635	rs140562123	G	A	13	1	270974
10	11109301	rs139613865	G	C	13	1	270974
10	11109709	.	A	G	13	1	270974
10	11110007	rs144017311	G	A	13	1	270974
10	11110260	.	A	G	13	1	270974
10	11110393	rs146460017	C	G	13	1	270974
10	11115256	.	A	T	13	1	270974
10	11116711	.	A	C	13	1	270974
10	11120776	.	C	T	13	1	270974
10	11122041	.	T	G	13	1	270974
10	11122071	rs148437244	T	A	13	1	270974
10	11122654	rs189407278	A	G	13	1	270974
10	11123104	.	C	G	13	1	270974
10	11124528	.	T	C	13	1	270974
10	11124759	rs111615560	G	A	13	1	270974
10	11125084	rs143169160	T	C	13	1	270974
10	11130968	rs149419682	G	A	13	1	270974
10	11138930	rs140095778	G	A	13	1	270974
10	11143392	rs149344801	G	A	13	1	270974
10	11144441	rs150793511	A	T	13	1	270974
10	11144588	.	C	T	13	1	270974
10	11145041	rs144873180	C	T	13	1	270974
10	11147709	rs139796056	C	G	13	1	270974
10	11148340	rs181508184	C	T	13	1	270974
10	11151992	.	C	G	13	1	270974
10	11154625	rs141808895	T	C	13	1	270974
10	11157325	rs182303251	C	T	13	1	270974
10	11161715	rs183599681	C	T	13	1	270974
10	11165866	rs181633580	A	G	13	1	270974
10	11166731	rs150635895	A	G	13	1	270974
10	11166848	rs149296023	T	G	13	1	270974
10	12212033	rs17151378	G	T	62	1	133830
10	12230995	rs75678593	C	G	62	1	133830
10	12233952	rs73581329	C	T	62	1	133830
10	12243940	rs75412290	A	G	62	1	133830
10	12246377	rs77963688	T	C	62	1	133830
10	12252059	rs17151406	G	C	62	1	133830
10	12255965	rs80038468	T	G	62	1	133830
10	12256716	rs12570018	G	A	62	1	133830
10	12258010	rs12570953	C	T	62	1	133830
10	12262309	rs117004479	G	A	62	1	133830
10	12266703	rs7923397	C	T	62	1	133830
10	12269153	rs188811824	G	C	62	1	133830
10	12271943	rs76235089	C	G	62	1	133830
10	12273168	rs78909883	T	G	62	1	133830
10	12275934	rs17151448	G	A	62	1	133830
10	12276572	rs17151455	G	A	62	1	133830
10	12277615	rs79496457	T	C	62	1	133830
10	12290116	rs75157426	C	A	62	1	133830
10	12290134	rs117364762	A	G	62	1	133830
10	12294881	rs77217995	G	A	62	1	133830
10	12301555	rs80099423	T	G	62	1	133830
10	12302634	rs12569532	C	A	62	1	133830
10	12303003	rs76630255	T	A	62	1	133830
10	12307337	rs117003190	G	C	62	1	133830
10	12308795	rs117363848	T	C	62	1	133830
10	12321142	rs12572159	C	A	62	1	133830
10	12321230	rs12569868	G	A	62	1	133830
10	12322114	rs117974348	C	T	62	1	133830
10	12322171	rs139200529	G	A	62	1	133830
10	12322255	rs190347626	G	A	62	1	133830
10	12322679	rs12569412	T	C	62	1	133830
10	12326235	rs142922948	C	T	62	1	133830
10	12327384	rs28792116	G	A	62	1	133830
10	12329214	rs74878729	C	T	62	1	133830
10	12330143	rs117875455	G	T	62	1	133830
10	12330597	rs17151512	C	T	62	1	133830
10	12337560	rs116869608	A	G	62	1	133830
10	12337742	rs75716877	C	T	62	1	133830
10	12338768	rs117394604	A	T	62	1	133830
10	12405507	rs143896790	G	C	8	1	326611
10	12408036	rs117486572	C	T	8	1	326611
10	12409612	rs78880569	G	A	8	1	326611
10	12410974	rs149830516	G	C	8	1	326611
10	12411114	rs79413750	A	G	8	1	326611
10	12415424	.	A	T	8	1	326611
10	12417680	rs77333948	G	A	8	1	326611
10	12422233	rs146332131	C	T	8	1	326611
10	12424353	rs77902893	A	G	8	1	326611
10	12424486	rs77886655	A	C	8	1	326611
10	12426461	rs116922855	A	G	8	1	326611
10	12430490	rs76991464	A	G	8	1	326611
10	12433163	rs117207334	A	G	8	1	326611
10	12434351	rs117294014	C	T	8	1	326611
10	12434844	rs117462775	A	T	8	1	326611
10	12440673	rs117273410	T	A	8	1	326611
10	12445430	rs78267201	T	C	8	1	326611
10	12451299	rs75725221	T	C	8	1	326611
10	12456855	rs78831184	G	C	8	1	326611
10	12462911	rs117767763	T	G	8	1	326611
10	12465834	rs76488693	A	G	8	1	326611
10	12475900	rs74801958	T	A	8	1	326611
10	12478214	rs117292405	G	A	8	1	326611
10	12478534	.	C	G	8	1	326611
10	12484257	rs143672497	G	A	8	1	326611
10	12484726	rs79160675	T	C	8	1	326611
10	12496203	rs146133603	T	A	8	1	326611
10	12498473	rs78728321	A	C	8	1	326611
10	12505868	rs118169509	G	T	8	1	326611
10	12512997	rs12573043	G	A	8	1	326611
10	12520916	rs4750218	G	A	8	1	326611
10	12522873	rs4750223	A	C	8	1	326611
10	12524018	rs74933734	C	G	8	1	326611
10	12525326	rs117891393	A	G	8	1	326611
10	12526028	rs4750227	C	T	8	1	326611
10	12527968	rs17151762	G	T	8	1	326611
10	12528100	rs78482384	T	C	8	1	326611
10	12529656	rs12570508	G	A	8	1	326611
10	12533944	rs185815671	C	T	8	1	326611
10	12543720	rs12571745	G	A	8	1	326611
10	12545612	rs77503970	C	A	8	1	326611
10	12547780	rs12571316	G	A	8	1	326611
10	12550440	rs117284872	A	C	8	1	326611
10	12550548	rs116870223	A	G	8	1	326611
10	12563202	rs118184390	G	A	8	1	326611
10	12565595	rs148897344	C	A	8	1	326611
10	12567360	rs75724674	C	T	8	1	326611
10	12567534	rs148348440	A	G	8	1	326611
10	12577037	rs79204413	C	A	8	1	326611
10	12577480	rs75302582	C	G	8	1	326611
10	12579338	rs141322057	T	C	8	1	326611
10	12580120	rs118167675	A	G	8	1	326611
10	12582024	rs12570430	C	A	8	1	326611
10	12584166	rs76121524	T	C	8	1	326611
10	12586670	rs117658931	G	A	8	1	326611
10	12591145	rs116891371	G	A	8	1	326611
10	12592849	.	G	A	8	1	326611
10	12594597	rs76319053	C	T	8	1	326611
10	12597011	rs2296755	T	C	8	1	326611
10	12599976	rs80274053	C	T	8	1	326611
10	12607410	rs140049080	G	A	8	1	326611
10	12608734	rs74981836	G	T	8	1	326611
10	12609590	rs117676699	C	T	8	1	326611
10	12618625	rs145266119	C	T	8	1	326611
10	12618821	rs117342434	C	A	8	1	326611
10	12631727	rs150420361	T	G	8	1	326611
10	12633143	rs117541906	C	A	8	1	326611
10	12633386	rs117139456	C	T	8	1	326611
10	12635514	rs4750240	G	A	8	1	326611
10	12636046	rs143869484	A	G	8	1	326611
10	12636861	rs12414346	T	C	8	1	326611
10	12638629	rs4750242	G	C	8	1	326611
10	12640027	rs2399875	C	T	8	1	326611
10	12643777	rs77582716	A	T	8	1	326611
10	12646282	rs59336224	G	C	8	1	326611
10	12647935	rs75819847	A	G	8	1	326611
10	12649696	rs76414312	A	G	8	1	326611
10	12652394	.	T	G	8	1	326611
10	12655763	rs186757016	C	T	8	1	326611
10	12656381	rs78603910	A	G	8	1	326611
10	12656784	rs117714905	A	G	8	1	326611
10	12656994	rs79970611	C	T	8	1	326611
10	12658556	rs371492092	T	G	8	1	326611
10	12662431	rs117755612	G	A	8	1	326611
10	12674546	rs148002174	A	G	8	1	326611
10	12678397	rs144387986	G	A	8	1	326611
10	12678535	rs147859805	C	T	8	1	326611
10	12692737	.	A	C	8	1	326611
10	12692982	rs139908516	G	A	8	1	326611
10	12699292	rs182237933	C	T	8	1	326611
10	12700870	rs145459631	C	T	8	1	326611
10	12702368	rs149609012	A	G	8	1	326611
10	12720154	rs151338501	C	T	8	1	326611
10	12725346	rs139142064	A	T	8	1	326611
10	12726538	rs149504351	A	G	8	1	326611
10	12727479	rs139374462	A	G	8	1	326611
10	12728012	rs117062448	A	G	8	1	326611
10	12729474	rs148960407	C	G	8	1	326611
10	12731098	rs143972196	C	G	8	1	326611
10	12732148	rs118152971	G	A	8	1	326611
10	12732601	rs145290995	T	G	8	1	326611
10	12735218	rs143667370	G	A	8	1	326611
10	12738604	rs140039263	T	C	8	1	326611
10	12739172	rs186334334	A	G	8	1	326611
10	12747922	rs193286955	C	T	8	1	326611
10	12751698	rs144435742	G	A	8	1	326611
10	12752414	rs146444411	T	G	8	1	326611
10	12962590	rs79593278	C	T	46	1	154547
10	12962643	rs75152080	A	G	46	1	154547
10	12962687	rs74607308	G	A	46	1	154547
10	12962992	rs79693679	C	A	46	1	154547
10	12963067	rs78937717	C	G	46	1	154547
10	12963209	rs77653451	A	G	46	1	154547
10	12963366	rs76858064	T	C	46	1	154547
10	12963657	rs76334543	G	A	46	1	154547
10	12963727	rs17501300	C	T	46	1	154547
10	12963847	rs74981563	A	G	46	1	154547
10	12964106	rs17592586	C	T	46	1	154547
10	12964404	rs79922541	T	A	46	1	154547
10	12964522	rs17501362	A	G	46	1	154547
10	12964889	rs17592642	G	A	46	1	154547
10	12965000	rs17501418	T	C	46	1	154547
10	12965081	rs17501439	T	C	46	1	154547
10	12965215	rs78501401	G	A	46	1	154547
10	12965326	rs17501479	T	A	46	1	154547
10	12965363	rs77483921	T	C	46	1	154547
10	12965654	rs17501542	C	A	46	1	154547
10	12965678	rs74361570	C	T	46	1	154547
10	12966061	rs76505656	G	A	46	1	154547
10	12966655	rs80018412	G	A	46	1	154547
10	12966703	rs17593012	T	C	46	1	154547
10	12966745	rs17593034	A	G	46	1	154547
10	12966823	rs75827968	A	G	46	1	154547
10	12966837	rs78132484	A	C	46	1	154547
10	12966848	rs80212962	T	G	46	1	154547
10	12966989	rs74962360	T	G	46	1	154547
10	12967185	rs17501784	A	C	46	1	154547
10	12967237	rs78562859	A	C	46	1	154547
10	12967307	rs17593082	C	T	46	1	154547
10	12967668	rs74597981	T	C	46	1	154547
10	12967801	rs17508369	T	C	46	1	154547
10	12968193	rs17508397	A	C	46	1	154547
10	12968311	rs17593201	T	C	46	1	154547
10	12968419	rs76144002	C	T	46	1	154547
10	12968591	rs76632575	C	T	46	1	154547
10	12968882	rs77770015	A	G	46	1	154547
10	12969141	rs79793932	G	A	46	1	154547
10	12969463	rs77621730	A	C	46	1	154547
10	12969666	rs10508449	C	T	46	1	154547
10	12969834	rs77223029	G	T	46	1	154547
10	12970342	rs78144073	G	A	46	1	154547
10	12970508	rs10508450	C	T	46	1	154547
10	12973927	rs80345334	A	G	46	1	154547
10	12977893	rs75063046	A	G	46	1	154547
10	12978019	rs78704279	A	G	46	1	154547
10	12978896	rs149626241	C	T	46	1	154547
10	12983397	rs117743313	C	G	46	1	154547
10	12984449	rs78097108	G	A	46	1	154547
10	12984461	rs74529729	A	G	46	1	154547
10	12984640	rs79619228	A	G	46	1	154547
10	12984827	rs78388927	G	A	46	1	154547
10	12990071	rs117763668	C	T	46	1	154547
10	13137560	rs75251744	A	T	44	1	157802
10	13139637	rs150948162	T	C	44	1	157802
10	13140541	rs79279469	A	C	44	1	157802
10	13145610	rs79289690	C	T	44	1	157802
10	13149885	rs74420236	C	T	44	1	157802
10	13150265	rs41291309	G	A	44	1	157802
10	13152658	rs75860863	A	G	44	1	157802
10	13160654	rs3814658	T	C	44	1	157802
10	13169382	rs78859725	C	T	44	1	157802
10	13174269	rs77873111	G	A	44	1	157802
10	13181490	rs59451732	A	G	44	1	157802
10	13184348	rs139470492	T	C	44	1	157802
10	13187415	rs117756324	T	C	44	1	157802
10	13191930	rs78679042	A	T	44	1	157802
10	13197067	rs143891073	G	T	44	1	157802
10	13197958	rs192036338	C	G	44	1	157802
10	13202053	rs117501357	A	G	44	1	157802
10	13208288	rs117820739	C	T	44	1	157802
10	13209166	rs75451642	A	C	44	1	157802
10	13209804	rs116963467	A	G	44	1	157802
10	13210325	rs10508454	G	T	44	1	157802
10	13210759	rs76230716	A	C	44	1	157802
10	13211075	rs77547513	C	T	44	1	157802
10	13212848	rs75610705	A	T	44	1	157802
10	13214427	rs17152897	A	G	44	1	157802
10	13215974	rs17152903	A	G	44	1	157802
10	13221912	rs11258231	A	C	44	1	157802
10	13227601	rs79987214	T	C	44	1	157802
10	13236214	rs76697840	A	G	44	1	157802
10	13240166	rs11258244	C	A	44	1	157802
10	13242698	rs78709973	C	T	44	1	157802
10	13243688	rs11258249	C	T	44	1	157802
10	13244255	rs118168867	G	T	44	1	157802
10	13253358	rs12355521	G	A	44	1	157802
10	13254130	rs9645605	T	C	44	1	157802
10	13255014	rs77804403	G	A	44	1	157802
10	13257601	rs11258255	A	G	44	1	157802
10	13266014	rs75473749	G	C	44	1	157802
10	13270684	rs75241629	G	A	44	1	157802
10	13288861	rs117572867	G	A	44	1	157802
10	13289084	rs72781317	A	G	44	1	157802
10	13293796	rs75719451	A	C	44	1	157802
10	13294273	rs72781327	T	C	44	1	157802
10	13300714	rs117834442	A	C	44	1	157802
10	13301082	rs181672138	G	T	44	1	157802
10	13302912	rs72781333	T	A	44	1	157802
10	13304882	rs150368420	C	G	44	1	157802
10	13308627	rs149393622	C	G	44	1	157802
10	13311076	rs72781345	A	C	44	1	157802
10	13311471	rs143503856	G	A	44	1	157802
10	13320798	rs72781349	C	G	44	1	157802
10	13337699	rs72781358	G	A	44	1	157802
10	13342538	rs72781364	C	T	44	1	157802
10	13346627	rs72781374	G	A	44	1	157802
10	13347578	rs72781375	A	G	44	1	157802
10	13350198	rs72781379	G	C	44	1	157802
10	13358035	rs72781391	C	T	44	1	157802
10	13363759	rs74975970	A	G	44	1	157802
10	13363776	rs78945258	A	G	44	1	157802
10	13363852	rs72781397	A	G	44	1	157802
10	13363973	rs72781398	C	T	44	1	157802
10	13364590	rs72781399	T	G	44	1	157802
10	13364914	rs62641685	C	G	44	1	157802
10	13367346	rs117140121	T	G	44	1	157802
10	13367498	rs72783304	T	C	44	1	157802
10	13368793	rs72783307	C	T	44	1	157802
10	13379403	rs3802580	C	A	44	1	157802
10	13379764	rs3802581	C	T	44	1	157802
10	13379917	rs3802582	T	C	44	1	157802
10	13382406	rs3802584	C	T	44	1	157802
10	13385170	rs72783325	G	A	44	1	157802
10	13386231	rs3802585	G	A	44	1	157802
10	13388584	rs1004621	G	C	44	1	157802
10	13392615	rs72783328	G	A	44	1	157802
10	13399545	rs148968980	G	A	44	1	157802
10	13405055	rs151024982	G	A	44	1	157802
10	13407443	rs72783345	T	A	44	1	157802
10	13407488	rs72783346	G	A	44	1	157802
10	13407614	rs146797525	C	G	44	1	157802
10	13407846	rs72783349	T	C	44	1	157802
10	13407989	rs41407747	C	G	44	1	157802
10	13412628	rs17602579	C	G	44	1	157802
10	13412997	rs141551029	A	G	44	1	157802
10	13414862	rs17602642	A	G	44	1	157802
10	13416078	rs2185408	C	T	44	1	157802
10	13416120	rs72783363	G	T	44	1	157802
10	13781759	rs117352069	T	G	18	1	233653
10	13781869	rs140618451	G	A	18	1	233653
10	13784349	rs747705	C	A	18	1	233653
10	13789946	rs75226622	G	A	18	1	233653
10	13789976	rs79490592	A	T	18	1	233653
10	13790023	rs17153876	C	T	18	1	233653
10	13790210	rs61102910	G	T	18	1	233653
10	13791215	rs75417454	A	G	18	1	233653
10	13791562	rs75458028	T	C	18	1	233653
10	13792441	rs74406157	T	A	18	1	233653
10	13792651	rs77360012	A	T	18	1	233653
10	13792709	rs17153902	T	C	18	1	233653
10	13793416	rs79297765	G	T	18	1	233653
10	13793860	rs77233401	A	G	18	1	233653
10	13793907	rs80009938	C	T	18	1	233653
10	13794834	rs80232047	C	T	18	1	233653
10	13794855	rs76726245	A	C	18	1	233653
10	13794926	rs76212177	G	A	18	1	233653
10	13795019	rs7098871	G	A	18	1	233653
10	13796633	rs78494477	T	C	18	1	233653
10	13797378	rs75297738	G	A	18	1	233653
10	13797853	rs17153925	T	C	18	1	233653
10	13798911	rs7093606	C	T	18	1	233653
10	13800936	rs17153930	A	C	18	1	233653
10	13802027	rs80237289	A	G	18	1	233653
10	13804830	rs75592950	C	T	18	1	233653
10	13804906	rs78839648	T	C	18	1	233653
10	13805546	rs78873893	A	G	18	1	233653
10	13805621	rs17153964	T	C	18	1	233653
10	13805849	rs75237074	T	C	18	1	233653
10	13808071	rs79901478	C	T	18	1	233653
10	13808379	rs1573139	A	G	18	1	233653
10	13809387	rs74485859	C	T	18	1	233653
10	13810318	rs80068779	A	G	18	1	233653
10	13810357	rs76400889	C	T	18	1	233653
10	13811970	rs77737236	A	T	18	1	233653
10	13813051	rs885611	G	C	18	1	233653
10	13813105	rs2400011	T	G	18	1	233653
10	13813453	rs1104917	C	G	18	1	233653
10	13814581	rs78095148	A	G	18	1	233653
10	13815498	rs75814134	T	C	18	1	233653
10	13817089	rs7085842	G	A	18	1	233653
10	13818974	rs79275120	A	C	18	1	233653
10	13819484	rs17153968	C	A	18	1	233653
10	13820306	rs75809929	A	G	18	1	233653
10	13821567	rs17153988	T	A	18	1	233653
10	13821958	rs78630553	A	G	18	1	233653
10	13822532	rs79446997	C	A	18	1	233653
10	13822953	rs61364753	T	G	18	1	233653
10	13855841	rs2141463	T	C	55	1	142120
10	13859742	rs12413238	A	G	55	1	142120
10	13860785	rs17154061	G	A	55	1	142120
10	13863583	rs77952180	T	C	55	1	142120
10	13864299	rs77590404	C	T	55	1	142120
10	13868473	rs76474392	A	G	55	1	142120
10	13871508	rs78401418	A	G	55	1	142120
10	13871533	rs34988420	T	C	55	1	142120
10	13872011	rs78589096	C	A	55	1	142120
10	13872101	rs17154092	A	G	55	1	142120
10	13872221	rs75977853	C	T	55	1	142120
10	13872320	rs79828825	T	C	55	1	142120
10	13872400	rs79369472	C	T	55	1	142120
10	13872530	rs115431846	G	C	55	1	142120
10	13872629	rs80207127	T	C	55	1	142120
10	13872660	rs116097186	C	T	55	1	142120
10	13872839	rs114594971	G	A	55	1	142120
10	13876687	rs41506144	C	G	55	1	142120
10	13882272	rs117357946	C	G	55	1	142120
10	14214130	rs77599342	A	G	70	1	122963
10	14214910	rs17154771	G	C	70	1	122963
10	14223254	rs56041226	G	C	70	1	122963
[truncated: 173,554 more rows]

## Sheet: Supplementary File 1c
Neanderthal Matching SPrime Segments
This table lists the Sprime segments that are confidently introgressed into the Estonian population by Neanderthals, using the Vindija Nenderthal genome as a reference (Prufer et al. 2017). The columns are (1) Segment index; (2) Segment chromosome; (3) Segment starting position (hg19); Segment ending position (hg19); (4) number of Sprime alleles within the segment; (4) segment Sprime score; (5) S…
SEGMENT	CHR	SEG_START	SEG_END	N_ALLELES	SCORE	ALLELES
344	13	76588590	76779300	77	112043	76588590;76591234;76592232;76592391;76593247;76595217;76596480;76596492;76599230;76599822;76600573;76606752;76606898;76607535;76607945;76608103;76608421;76608811;76610716;76612893;76615279;76618447;76620845;76620871;76621437;76621477;76622394;76623593;76625468;76625769;76627176;76630199;76631726;76633093;76637458;76639752;76641869;76642473;76647631;76650770;76652622;76656399;76658266;76662603;766…
346	13	79254942	79467360	74	110194	79254942;79260726;79270482;79277739;79280886;79284916;79287729;79292109;79294606;79295701;79295884;79300347;79307709;79311306;79311996;79313969;79314189;79316588;79320703;79323945;79324324;79324582;79328236;79329034;79329341;79330068;79330747;79333115;79333139;79334208;79335274;79335380;79335882;79336416;79336899;79337401;79340348;79346390;79346710;79347397;79350178;79350848;79358587;79361273;793…
347	13	77459221	77625684	54	109106	77459221;77462624;77462872;77463765;77466744;77469249;77474727;77477763;77480690;77483528;77485902;77488262;77492291;77498035;77499000;77503423;77504683;77505438;77507293;77507497;77515246;77516899;77526188;77531082;77531115;77536043;77536697;77540469;77546129;77549057;77550497;77552400;77554526;77554936;77557799;77563467;77570078;77576236;77582012;77584174;77585273;77585949;77586548;77596857;775…
341	13	94925487	95063820	59	115374	94925487;94931127;94944969;94945736;94945943;94946107;94946779;94947739;94948147;94948235;94948275;94948433;94949003;94949017;94949122;94949416;94951743;94952097;94952648;94952662;94953867;94955608;94956694;94956826;94959240;94964920;94967677;94970341;94970368;94972995;94974992;94983847;94984210;94990312;94990569;94991205;94992827;95003835;95004765;95005373;95007048;95008097;95009006;95009333;950…
342	13	20812985	20914947	47	112715	20812985;20815968;20820477;20820622;20822390;20832455;20832874;20834090;20838486;20842271;20844536;20848674;20854697;20856006;20857386;20857644;20863453;20877547;20878882;20881383;20883704;20887700;20892295;20892566;20892608;20892681;20892716;20892896;20892921;20893557;20893902;20894161;20894190;20894290;20894393;20894433;20894510;20895209;20895418;20895572;20895852;20903179;20908628;20909131;209…
1653	9	28219709	28325242	68	117093	28219709;28222843;28225378;28242402;28254956;28257665;28258425;28261466;28265749;28269035;28270222;28270435;28272048;28274717;28278197;28283603;28286775;28287727;28288067;28294373;28294616;28294648;28295371;28296198;28297251;28297528;28297620;28297807;28297817;28297859;28298043;28298275;28299637;28302224;28303859;28305698;28306432;28306876;28306925;28307232;28307302;28307359;28307668;28307844;283…
298	13	62070771	63258001	346	218694	62070771;62073969;62075816;62083734;62086997;62089418;62089529;62089680;62091079;62092067;62092206;62092905;62093082;62093859;62096709;62096819;62097877;62098532;62100313;62101466;62102922;62104576;62106105;62108287;62110985;62111755;62112466;62112596;62114604;62114767;62115971;62118495;62119930;62121272;62121365;62124269;62124585;62125624;62125744;62126740;62128265;62128351;62129330;62130123;621…
294	13	106249305	106290338	60	234830	106249305;106250754;106252185;106252365;106256025;106256338;106258611;106260442;106262230;106265260;106268419;106269099;106269391;106269419;106269973;106270387;106270659;106270749;106270973;106271489;106272241;106272363;106272491;106272824;106272843;106273223;106273669;106273883;106273954;106273982;106274005;106274144;106274369;106275113;106275132;106275257;106275876;106275954;106276190;106276496…
292	13	67862582	68069178	128	265616	67862582;67863657;67863870;67864649;67864866;67866276;67866796;67868356;67869961;67870341;67870965;67872938;67875676;67876657;67877469;67877659;67880391;67881968;67886286;67897545;67903673;67906971;67907630;67908910;67909999;67911439;67914748;67914951;67917717;67919214;67921677;67922916;67924011;67924334;67924603;67926705;67929772;67933370;67933989;67934149;67934601;67935039;67935236;67935945;679…
293	13	102499955	102533699	50	254169	102499955;102500105;102500267;102500354;102500500;102501323;102501348;102501867;102501919;102502028;102503922;102504999;102513040;102514541;102514602;102514870;102515035;102515318;102515359;102515566;102515801;102516157;102516399;102516472;102516533;102516847;102518161;102518272;102518809;102518904;102519146;102519486;102520761;102520845;102520884;102521051;102521714;102522280;102522846;102523171…
290	13	47043202	47245708	103	335438	47043202;47046793;47046867;47047392;47048016;47048107;47048445;47048461;47048746;47048906;47049385;47049494;47049584;47049739;47049780;47049804;47049902;47050778;47050870;47050956;47051180;47051475;47051568;47052348;47052423;47053518;47053788;47054413;47060405;47060780;47064203;47065417;47067542;47076185;47076230;47076899;47092087;47092344;47096950;47097368;47097612;47100734;47103168;47112646;471…
291	13	69269806	69775557	271	273496	69269806;69271187;69272657;69273062;69273788;69277246;69278605;69278687;69279346;69279999;69280066;69282671;69285816;69288134;69291309;69291828;69301250;69304312;69305422;69306184;69309215;69310597;69310611;69310644;69310670;69310902;69311231;69311656;69311682;69312120;69313014;69314258;69314848;69315265;69315975;69317137;69317179;69317517;69317892;69318202;69319889;69320235;69320336;69321188;693…
274	12	78433180	78568772	49	108547	78433180;78433849;78436139;78444379;78445966;78446918;78449747;78452337;78457225;78459354;78470563;78483853;78489880;78491454;78501215;78502529;78505512;78507358;78511737;78513767;78518718;78524853;78527499;78532692;78533577;78535191;78535680;78536781;78539887;78553183;78554274;78555779;78555864;78557091;78558089;78559943;78560045;78561140;78561156;78562826;78563153;78563163;78563213;78563253;785…
278	12	62312101	62588904	101	107730	62312101;62313702;62320004;62326184;62326473;62326506;62327092;62341394;62348856;62355493;62356975;62360794;62361060;62372128;62377473;62381944;62389762;62392380;62395720;62395912;62398118;62398417;62398723;62402751;62403802;62406777;62408965;62409282;62422386;62425618;62426616;62428349;62437299;62440991;62446457;62462054;62470491;62471194;62474025;62475809;62477003;62479532;62480065;62485024;624…
109	11	132913987	133041306	68	270839	132913987;132914296;132914431;132914444;132915151;132915865;132916011;132917968;132918185;132918314;132919729;132922374;132922693;132924064;132926071;132929702;132935187;132936712;132936760;132938285;132949026;132955076;132956204;132960253;132960295;132960917;132962960;132970787;132971065;132971699;132978920;132979118;132989766;132991814;132994467;132994800;132999715;133000046;133006100;133008494…
103	11	4591149	4945199	157	321386	4591149;4591942;4592473;4594490;4598713;4598956;4600285;4601162;4601228;4603225;4604747;4604833;4604855;4612694;4612831;4613355;4613802;4615857;4616119;4620942;4621276;4624246;4625696;4629021;4629075;4634911;4639283;4640916;4643807;4644326;4645302;4645866;4651747;4656233;4657811;4662372;4662415;4673788;4676067;4676415;4678098;4679919;4680048;4680087;4680394;4680467;4680577;4680785;4680822;4680956…
100	11	45360514	45703540	175	353660	45360514;45363252;45365005;45366065;45366830;45367422;45371153;45391124;45395810;45398016;45399819;45399905;45403939;45406317;45407086;45407819;45408140;45408293;45411230;45412091;45412297;45421392;45433578;45433762;45434736;45439345;45440540;45443179;45444515;45445336;45446114;45446690;45447924;45448371;45451883;45452771;45452873;45453852;45455522;45456128;45457902;45459739;45461685;45463663;454…
101	11	56466412	57137809	520	349701	56466412;56466434;56466471;56466503;56466521;56466566;56466577;56466602;56466613;56466650;56466714;56466731;56466754;56466767;56466778;56466791;56466802;56466814;56466853;56466877;56466889;56466910;56466953;56466967;56466982;56467034;56467100;56467120;56467134;56467149;56467180;56467203;56467214;56467231;56467247;56467276;56467292;56467322;56467341;56467352;56467367;56467390;56467441;56467451;564…
106	11	81656756	82298773	226	285197	81656756;81661233;81662136;81666776;81667199;81678877;81681116;81681223;81688808;81690361;81696574;81698871;81707740;81707843;81711114;81711225;81712134;81720964;81723528;81723832;81725995;81730092;81731342;81731767;81732105;81732775;81741128;81744565;81745665;81747754;81751429;81753082;81757897;81758358;81760434;81761414;81762549;81764806;81765251;81765370;81767371;81772801;81777557;81781624;817…
107	11	61284949	61393090	54	280803	61284949;61292305;61296512;61300476;61301616;61304355;61307857;61312889;61314985;61315465;61316091;61316336;61316820;61319039;61321422;61323521;61326772;61328875;61330359;61335492;61338153;61339770;61342377;61345514;61345621;61347431;61347500;61350261;61352098;61353216;61354738;61354825;61354875;61355255;61356045;61356112;61357422;61357480;61357641;61359511;61364392;61369340;61369585;61376967;613…
104	11	116428591	116667545	91	319706	116428591;116428953;116436761;116437333;116437347;116437360;116438851;116440214;116447795;116450579;116457391;116457471;116465552;116466039;116471898;116478904;116488753;116494264;116495784;116496309;116500588;116500629;116500768;116501053;116501072;116501089;116501987;116502267;116502752;116502776;116502823;116504377;116506410;116508833;116510369;116510542;116512452;116512747;116513428;116514092…
105	11	100419500	101594826	399	304389	100419500;100419525;100423999;100427512;100428969;100430005;100431731;100433972;100436383;100436452;100436671;100439235;100444456;100444990;100446281;100451488;100451975;100451995;100452869;100456729;100457065;100457812;100460037;100463238;100464253;100471466;100475144;100477031;100478345;100488178;100493426;100497171;100498709;100501613;100503032;100503354;100503532;100506272;100508599;100512126…
1001	3	31500062	31778841	98	200185	31500062;31500104;31500147;31501098;31502725;31503825;31504761;31508513;31510674;31512587;31513139;31513209;31514900;31515147;31527786;31529298;31529704;31531038;31531075;31531365;31531919;31533758;31535067;31537823;31539370;31541383;31545331;31547787;31548357;31557073;31559863;31560465;31563519;31564739;31567680;31569208;31571513;31579621;31580149;31580455;31586568;31589012;31592257;31594087;315…
1375	6	130936887	131501834	131	135966	130936887;130937005;130939815;130945221;130947051;130948491;130948960;130949036;130952212;130953501;130963908;130966614;130971235;130976163;130976364;130981075;130984183;130996447;130998704;130999513;131002367;131005842;131007161;131009056;131019640;131022447;131024225;131025781;131030225;131031004;131031516;131032252;131034925;131035041;131035572;131042764;131046867;131055585;131057110;131061236…
1374	6	121374583	121766582	283	137076	121374583;121374819;121377885;121381843;121387376;121388978;121389352;121390035;121391365;121392846;121395925;121400826;121401173;121403900;121404842;121406330;121408503;121414902;121418264;121422286;121422564;121423560;121424996;121425716;121425889;121426800;121428173;121433192;121439683;121441780;121444034;121446118;121449294;121467821;121478472;121480045;121498255;121499985;121501090;121501588…
99	11	21460223	22157995	417	459215	21460223;21460313;21467384;21468068;21469535;21484658;21493143;21497047;21497188;21508706;21509224;21509298;21509641;21511156;21511207;21511626;21514410;21514552;21515575;21515826;21516589;21516842;21516901;21517094;21517521;21517566;21518377;21519007;21519714;21520334;21520760;21521103;21521202;21521391;21521522;21521973;21521994;21522420;21522458;21522601;21524537;21524615;21524826;21524846;215…
94	10	122384146	122518341	49	104314	122384146;122386093;122386788;122390064;122392050;122392832;122402798;122405719;122410526;122412320;122415943;122416495;122416761;122418605;122421758;122422085;122423820;122425019;122431259;122431299;122435782;122437264;122438569;122442238;122442963;122445864;122448559;122449962;122451597;122452504;122455852;122461271;122465082;122466030;122468895;122471751;122485176;122489477;122489981;122491056…
1625	9	130311025	130541486	81	154615	130311025;130314463;130315496;130316152;130317865;130317968;130318476;130319568;130324152;130326878;130332059;130332386;130333376;130334305;130335102;130337054;130338913;130339530;130348133;130352497;130355535;130356074;130358303;130360261;130362106;130365817;130365990;130366077;130368719;130373199;130384087;130392854;130394058;130396168;130396359;130397409;130400761;130415825;130417937;130418900…
1439	7	81889783	82091119	92	315335	81889783;81894548;81898794;81901774;81902070;81903450;81909413;81909898;81910195;81911495;81914418;81914713;81915181;81915621;81921839;81924194;81930071;81932507;81932602;81945580;81958456;81958673;81959039;81967301;81967311;81969170;81969227;81970476;81971610;81972945;81973073;81973162;81973396;81974066;81974224;81974437;81975142;81976058;81978291;81978346;81978469;81985241;81985707;81986440;819…
1191	4	101401867	101663126	85	107728	101401867;101404064;101410170;101410906;101410976;101427977;101436858;101447122;101454852;101461339;101463911;101466979;101474607;101479451;101482316;101482737;101482765;101483378;101484847;101485243;101487622;101488344;101491607;101494678;101501112;101504687;101506148;101507517;101508994;101512063;101513359;101514702;101518319;101518701;101523024;101523169;101525808;101526089;101529984;101531032…
1176	4	32328411	32487823	87	118853	32328411;32329743;32335063;32335475;32337899;32341241;32341523;32343815;32343903;32346488;32347413;32348941;32349347;32349850;32361637;32363660;32367833;32367997;32369183;32375856;32376327;32377392;32386548;32391398;32395965;32399672;32404839;32407017;32413189;32416894;32423286;32432676;32434234;32434691;32435010;32435414;32435700;32435737;32435959;32438050;32439057;32439909;32441383;32441575;324…
1174	4	118225949	118479095	85	119619	118225949;118226134;118226865;118226894;118227271;118230353;118232761;118233534;118239180;118240273;118240853;118240871;118246676;118246896;118254179;118259170;118263233;118268488;118270549;118273431;118274282;118280342;118285549;118287967;118294085;118297315;118301057;118302526;118303971;118306572;118307548;118310939;118312339;118315017;118317011;118317750;118319187;118319943;118332262;118339022…
1172	4	27514185	27616957	106	121336	27514185;27523757;27523955;27524241;27524330;27524672;27524682;27524733;27524829;27524920;27525267;27525746;27525959;27528755;27528874;27530518;27531055;27533973;27536567;27537341;27538650;27538832;27539789;27540007;27540462;27543441;27543458;27543683;27544056;27544720;27545832;27546041;27546109;27546119;27546145;27546344;27547353;27547363;27547532;27548341;27548521;27548854;27549011;27549060;275…
513	16	8900436	9100237	77	122286	8900436;8903763;8913774;8917206;8917914;8920485;8920762;8923835;8928858;8929523;8930802;8934921;8936041;8937044;8937603;8937740;8940567;8940811;8942941;8943452;8946904;8949187;8949220;8950250;8950326;8952790;8953676;8954569;8956633;8958860;8976554;8980091;8981955;8982155;8983392;8983735;8984129;8985092;9000729;9009286;9013696;9015721;9016532;9019416;9025252;9026099;9026656;9029799;9033796;9035467…
1003	3	169925714	170152131	89	197577	169925714;169926695;169931931;169932613;169935227;169935425;169944884;169949106;169949130;169952374;169960750;169961927;169975004;169975016;169976579;169977197;169978803;169981370;169984894;169986733;169988154;169992394;169996202;169997527;169999414;169999670;170006417;170012372;170013071;170024104;170026734;170030017;170031613;170031944;170036256;170036910;170038661;170038732;170041000;170041237…
879	2	116417100	117086631	259	261215	116417100;116417276;116424408;116426651;116426769;116433151;116435569;116435707;116435764;116440925;116446977;116447647;116448741;116456725;116461378;116462616;116463379;116468761;116480905;116481704;116485047;116486114;116488233;116489246;116495793;116496015;116501020;116504901;116506146;116509023;116526611;116528155;116528900;116530429;116537586;116550452;116554889;116554972;116556344;116558779…
689	1	33739636	34043986	123	156575	33739636;33741787;33741895;33743120;33743256;33743298;33748837;33751075;33757097;33757466;33757983;33758206;33760197;33762739;33764061;33767290;33767825;33775773;33776154;33789670;33792357;33792698;33794852;33796229;33799548;33799900;33813680;33816855;33820134;33824511;33825300;33835392;33835406;33835555;33839591;33840350;33848135;33848639;33849549;33858796;33862037;33862294;33869060;33870494;338…
685	1	237277507	237380534	45	164353	237277507;237277762;237284801;237286590;237288938;237293809;237301279;237310421;237315504;237321582;237322483;237322929;237329162;237331537;237332368;237335242;237335517;237335541;237336059;237337079;237338827;237340415;237341272;237342052;237342945;237342998;237344973;237345066;237347572;237347786;237351309;237352560;237353031;237353933;237354866;237356015;237360458;237364909;237366842;237367013…
687	1	12158567	12597740	131	158165	12158567;12162021;12164079;12164391;12164675;12165130;12168523;12169977;12170974;12171012;12171730;12173446;12174100;12188614;12206712;12212141;12212633;12221372;12223955;12225374;12229010;12235724;12239151;12242205;12245401;12249305;12253062;12260399;12264878;12266656;12273476;12274919;12276244;12283588;12285644;12287241;12288532;12289389;12295317;12295909;12300106;12312548;12313641;12326532;123…
686	1	75995645	76291226	95	159146	75995645;76001216;76004492;76010778;76013317;76014675;76015178;76015939;76016344;76016905;76017110;76017866;76026218;76030374;76030673;76031581;76032229;76033217;76038341;76042467;76044198;76044304;76045949;76047450;76047889;76048136;76049154;76050980;76058907;76062093;76063008;76063134;76066161;76066889;76069185;76071517;76072505;76073318;76074822;76075214;76080069;76080723;76084218;76084334;760…
680	1	4180806	4698271	212	171104	4180806;4183788;4185513;4186094;4186123;4187916;4188046;4188222;4188737;4188857;4188875;4188903;4188921;4188931;4189359;4189422;4189443;4189484;4189507;4189599;4189621;4189690;4190167;4190195;4190242;4190257;4190982;4191047;4191529;4206250;4207391;4210630;4212585;4212626;4216781;4218781;4227091;4227351;4228548;4228980;4229842;4230081;4230463;4232007;4232981;4234940;4236710;4237878;4237984;4238038…
683	1	209784002	210398215	198	166740	209784002;209784188;209787702;209787811;209789467;209791508;209791929;209792244;209793111;209793807;209794258;209797198;209797253;209797498;209797665;209798068;209798155;209801058;209801569;209802894;209804190;209807094;209807228;209807782;209807815;209809274;209809673;209809790;209810698;209811806;209818762;209819926;209820022;209826726;209828239;209828308;209841273;209850020;209850138;209858453…
873	2	232717255	233302219	218	339753	232717255;232724461;232734475;232737558;232742601;232745800;232748713;232748937;232750974;232752675;232757333;232758588;232759254;232763060;232763510;232763694;232769337;232769483;232775111;232775867;232783698;232797021;232798864;232799662;232801627;232802489;232802625;232806505;232808314;232812489;232818361;232821108;232821953;232823051;232824683;232824707;232826860;232829279;232829502;232832544…
406	14	93411497	93627693	52	114805	93411497;93411918;93412031;93418069;93419166;93419340;93424226;93426640;93435939;93438249;93440649;93440985;93450862;93454787;93455402;93456798;93457431;93464075;93467059;93467887;93469298;93475852;93477921;93480458;93482485;93485092;93485907;93491901;93493770;93499509;93502222;93511060;93514604;93521625;93524019;93527610;93530484;93540661;93548726;93550686;93551066;93551451;93555717;93562505;935…
405	14	51702432	51825065	46	116806	51702432;51704723;51705588;51706910;51706922;51708905;51714799;51715034;51718207;51719868;51724624;51725775;51727623;51730386;51733853;51734621;51739583;51743154;51743249;51744337;51744832;51746260;51747888;51749542;51750617;51751081;51752562;51752754;51752902;51755235;51756630;51757191;51769956;51774149;51778483;51781455;51786252;51790573;51791834;51792828;51794606;51804555;51812054;51814097;518…
1372	6	7981891	8069826	36	138527	7981891;7988394;8002752;8005666;8008383;8013126;8018853;8022206;8029565;8030041;8031707;8033307;8033959;8038418;8053233;8057608;8065264;8065312;8065367;8065543;8065560;8065707;8065818;8066223;8066872;8066916;8067324;8067457;8068192;8068659;8068815;8068882;8068894;8069465;8069583;8069826
403	14	77942506	78113260	48	117705	77942506;77943842;77950205;77956861;77959068;77959490;77962046;77964661;77968695;77970128;77979110;77979718;77991359;77995298;78001692;78004564;78006685;78009392;78012954;78019783;78020457;78022739;78022855;78034111;78034779;78037162;78037331;78042307;78047454;78061009;78061892;78063279;78067042;78067545;78069675;78070313;78074806;78074940;78077041;78082110;78086741;78088813;78091660;78096108;781…
401	14	79669795	79938323	77	119488	79669795;79671575;79673607;79680760;79681532;79683344;79683673;79684830;79686969;79688557;79689186;79691175;79707466;79709460;79710645;79713575;79715393;79717194;79717422;79720833;79725416;79727744;79728123;79729990;79732733;79735509;79736887;79744836;79750299;79757254;79757428;79758420;79762142;79767082;79767486;79773980;79783429;79785304;79786185;79786747;79789482;79791283;79791685;79794925;797…
1379	6	157896912	157974454	41	130030	157896912;157901980;157902029;157902078;157902170;157902552;157902886;157903193;157918038;157926044;157935894;157937084;157937191;157938092;157938121;157938691;157939133;157939554;157941109;157941608;157948134;157948697;157950290;157950344;157950581;157952818;157953616;157955255;157959037;157959844;157960491;157960849;157961548;157963370;157963951;157967368;157967546;157967650;157968492;157972988…
1378	6	70365131	70739854	110	132452	70365131;70369198;70369632;70370353;70371318;70372833;70384535;70392529;70397738;70406626;70407758;70419255;70419956;70421051;70421790;70425596;70425897;70435403;70443428;70445050;70450031;70454253;70472735;70473603;70478527;70480981;70483454;70487877;70500834;70503090;70508650;70515073;70515267;70516845;70529150;70539253;70542348;70543261;70551128;70553125;70555321;70560488;70563560;70564992;705…
409	14	72352898	72470679	48	110240	72352898;72353650;72353723;72354541;72355960;72357347;72359641;72359993;72365408;72374413;72375036;72375753;72380109;72380387;72382794;72387666;72388475;72388743;72388901;72390211;72390264;72393522;72396337;72396939;72397419;72398547;72403414;72405657;72409015;72413377;72413836;72417827;72424089;72424812;72428113;72428793;72433102;72433303;72437149;72456907;72461647;72465488;72465951;72467439;724…
408	14	81131322	81491652	104	110687	81131322;81133809;81141270;81146378;81146879;81149066;81153493;81159189;81163332;81165251;81173569;81177458;81177473;81178966;81182666;81183223;81184135;81187025;81191973;81193927;81202260;81202923;81210047;81211061;81211269;81213891;81218265;81228144;81230207;81232329;81233067;81234109;81236637;81250194;81252313;81255918;81259653;81263562;81268513;81275444;81277412;81277745;81283615;81287220;812…
453	15	63577624	63722953	57	128929	63577624;63577949;63579780;63585128;63597072;63605364;63605923;63611828;63615016;63616561;63618032;63618250;63624144;63625091;63627576;63628048;63628120;63628152;63628289;63630891;63631505;63633238;63634428;63634487;63637528;63638637;63639324;63640496;63643541;63645643;63652976;63653886;63655120;63655327;63663751;63673669;63678018;63680067;63682350;63683072;63688374;63691103;63693773;63694105;636…
1344	6	101940447	102112180	70	176050	101940447;101941322;101941715;101942496;101945549;101946692;101948495;101954103;101957616;101959459;101967242;101968681;101969408;101973603;101974503;101977574;101982171;101983675;101986339;101987050;101987433;101988325;101992044;101996709;102001943;102003148;102005413;102008002;102008051;102017720;102018861;102018981;102019446;102021910;102025932;102028709;102028964;102029424;102032950;102033170…
1345	6	103765925	104489325	238	174814	103765925;103767533;103771148;103779494;103784909;103785649;103785868;103788691;103789702;103793134;103796804;103798160;103799161;103801210;103805799;103819859;103819879;103821011;103830453;103831496;103834178;103834802;103834975;103837229;103839208;103840019;103849692;103850490;103852990;103853348;103857255;103865018;103866249;103867165;103869552;103877992;103882720;103888428;103890650;103896742…
379	14	103019515	103388439	145	149628	103019515;103019617;103019798;103025794;103037342;103039531;103045633;103046491;103046688;103048111;103048209;103050105;103051986;103052212;103058037;103067675;103067989;103071860;103078770;103078985;103090607;103097290;103100672;103107707;103111584;103114130;103116820;103117085;103134221;103136233;103136800;103138192;103139244;103140411;103146105;103146374;103153030;103157888;103158270;103164465…
370	14	96018041	96146156	66	180495	96018041;96019718;96021485;96022788;96023217;96024717;96026014;96026574;96027015;96027886;96027911;96027981;96028242;96030013;96030485;96030675;96033116;96034187;96034941;96036966;96040113;96041288;96043013;96043487;96047049;96048592;96050727;96066984;96069841;96070727;96073360;96073439;96074033;96074438;96078883;96080037;96084532;96085334;96090002;96092951;96092976;96093301;96094594;96095517;960…
375	14	68072097	68247336	69	167325	68072097;68072213;68072302;68072581;68072614;68073013;68073245;68073433;68073705;68074231;68075029;68075057;68075125;68075168;68075334;68075642;68075653;68076051;68076403;68076720;68077521;68079391;68084237;68084617;68085454;68087731;68094770;68095665;68096483;68100272;68100525;68101911;68105853;68121086;68121147;68122608;68131866;68134536;68134578;68143057;68144585;68146915;68151072;68152582;681…
376	14	43491069	44187333	245	159313	43491069;43500928;43501524;43504305;43505327;43505445;43508290;43508997;43511360;43512846;43514993;43517553;43517745;43517881;43520424;43524815;43529473;43531692;43532563;43537243;43537765;43538131;43539244;43547009;43551546;43551612;43567407;43576080;43577566;43579649;43579976;43592329;43594907;43595550;43600712;43603120;43610468;43612364;43613148;43614269;43615119;43615387;43615856;43618404;436…
393	14	49958758	50125329	79	130415	49958758;49961631;49968518;49972655;49972723;49973425;49975894;49977565;49979251;49980932;49982275;49987115;49987643;49993587;49998529;50000020;50000640;50004210;50005334;50006909;50007915;50008346;50011425;50012187;50012698;50013866;50014904;50015629;50015787;50015930;50017499;50020847;50023803;50024564;50025171;50025510;50025668;50026146;50027094;50029725;50030182;50030362;50031878;50032446;500…
397	14	86055732	86201527	61	122682	86055732;86056077;86066490;86067152;86068859;86075478;86079806;86081589;86085876;86089253;86089508;86091242;86094573;86097835;86101469;86104515;86104912;86105238;86107615;86107751;86109161;86115340;86115645;86116390;86117041;86121434;86121492;86133672;86142209;86142272;86147248;86153888;86157510;86158670;86158929;86159941;86160397;86161621;86167945;86168189;86172209;86174745;86177126;86196310;861…
395	14	92828250	92934379	41	125042	92828250;92829170;92830083;92831219;92831285;92832002;92832771;92833251;92833554;92833740;92838693;92840572;92840878;92841686;92841935;92843953;92844602;92845631;92847609;92854627;92855856;92857865;92861638;92864223;92871785;92871959;92877383;92877613;92878150;92880030;92880148;92880386;92884389;92885946;92898011;92906150;92906697;92923836;92931103;92931878;92934379
394	14	53635451	53866172	72	130220	53635451;53646827;53646857;53658894;53659572;53667858;53668653;53669395;53671417;53672592;53674313;53677493;53678934;53681539;53685963;53687659;53699716;53700004;53702041;53703997;53704045;53705483;53709892;53713013;53716074;53719085;53722714;53722768;53727977;53729265;53732977;53739396;53743715;53753506;53759458;53766506;53771409;53773595;53774780;53777077;53778965;53780980;53782025;53783670;537…
399	14	69054485	69198876	46	122118	69054485;69055743;69059451;69063430;69068365;69069416;69081273;69085085;69086516;69090512;69090796;69101987;69104743;69106738;69110530;69111114;69117751;69120106;69122391;69130070;69130588;69139724;69142080;69146824;69151346;69163110;69167738;69170063;69175149;69175778;69178241;69178260;69178375;69178458;69178697;69178795;69181429;69184103;69184225;69185656;69189940;69190069;69192545;69195403;691…
895	2	238470681	238572133	69	184533	238470681;238470910;238470990;238472726;238473132;238473506;238475826;238476392;238476453;238476584;238476608;238478200;238478499;238478804;238479607;238479672;238479749;238479849;238484340;238485256;238485481;238486309;238486767;238487257;238487818;238488164;238488706;238489150;238491014;238491714;238494494;238499969;238509324;238509820;238509907;238511168;238511712;238512217;238512808;238518361…
245	12	16575229	16688343	57	130781	16575229;16580235;16580783;16581090;16587985;16595496;16596247;16597252;16599946;16605861;16605910;16610553;16611366;16613456;16617073;16618212;16618568;16619899;16629348;16631089;16631164;16636024;16638668;16641540;16642404;16645924;16648942;16659068;16660613;16660767;16660807;16663375;16664050;16667130;16667164;16667623;16667651;16669898;16671237;16671647;16673062;16673503;16674174;16674932;166…
241	12	113991313	114607167	217	135250	113991313;113994784;113994862;113998414;114004606;114015641;114018577;114020489;114020713;114020859;114021299;114022918;114022968;114023119;114023467;114023513;114032700;114034868;114036798;114039180;114040669;114040824;114045183;114046679;114047575;114050965;114051617;114055794;114057310;114059588;114070604;114087893;114087939;114087988;114088672;114088790;114089069;114089633;114089867;114089985…
248	12	53242415	53365184	62	128033	53242415;53246960;53259655;53275264;53275946;53278127;53278429;53278451;53278851;53278911;53279239;53279959;53280673;53280934;53282149;53282554;53283269;53283916;53284012;53284199;53284460;53284941;53286523;53286983;53287021;53289858;53289869;53289992;53290084;53290153;53290229;53290394;53290681;53290712;53290778;53291459;53291480;53291585;53291821;53291892;53292643;53292957;53293024;53293211;533…
179	11	20255984	20563528	85	104974	20255984;20263646;20264278;20266046;20266395;20269176;20280844;20283924;20284847;20286888;20292602;20307705;20308355;20312029;20312386;20314643;20316200;20321192;20321484;20327764;20333045;20333235;20334260;20342456;20346244;20353127;20359563;20362323;20362762;20363684;20366385;20368127;20368740;20380868;20381027;20382349;20392484;20395948;20401432;20415079;20425184;20426090;20429454;20429807;204…
178	11	42685000	42778879	105	104981	42685000;42692921;42694224;42698912;42699285;42699647;42700129;42700390;42700525;42700605;42700735;42701110;42704396;42704604;42704747;42705077;42705330;42705529;42705797;42705888;42706351;42706386;42707241;42707321;42708101;42708627;42708768;42709314;42709673;42709841;42709941;42710278;42710423;42711219;42711489;42711641;42711702;42711817;42712401;42712773;42713141;42713382;42713530;42713542;427…
174	11	111569743	111971664	167	106490	111569743;111576594;111578922;111580182;111581008;111581766;111583608;111584496;111585196;111585246;111585536;111585570;111585919;111586331;111586406;111586419;111587173;111587215;111587630;111588324;111588484;111589665;111593714;111595068;111597954;111598010;111598586;111600671;111600696;111601774;111601838;111602190;111603150;111603196;111604194;111605309;111605637;111608659;111608853;111608954…
173	11	346015	545700	75	106683	346015;352963;353098;353861;354119;359532;365897;367049;367430;370876;371265;371325;371494;371514;372095;372225;383510;383554;388020;388298;390003;395343;396406;396473;397706;397732;403939;409385;409720;419167;424291;428385;433135;437401;437559;438939;439073;449818;457879;460765;462684;462855;466032;467368;473300;477623;484469;487101;487136;487201;491334;492057;494662;495699;495892;496193;501429;…
172	11	117903749	118022257	34	107551	117903749;117904485;117910983;117917248;117923063;117923131;117928795;117934118;117936709;117938323;117947603;117948387;117949798;117950316;117950386;117950522;117953936;117957500;117961862;117964909;117965872;117966528;117966847;117970326;117970787;117973151;117988105;118003672;118005605;118009832;118012555;118018732;118022220;118022257
171	11	91376645	91626721	72	107587	91376645;91380370;91386461;91394378;91394780;91406725;91409639;91411583;91414297;91418465;91418657;91418946;91419088;91419226;91419438;91419731;91420030;91420716;91421056;91421219;91421714;91421870;91421970;91422238;91422261;91422801;91425082;91425668;91431391;91434703;91435695;91435877;91439422;91449871;91450305;91451947;91452057;91453079;91456557;91471537;91475456;91475755;91479122;91484895;914…
170	11	9907399	10369255	115	107714	9907399;9910188;9911781;9913713;9917615;9923684;9933553;9941245;9947376;9948404;9952121;9954011;9954137;9954652;9959655;9963016;9965136;9966421;9967170;9968290;9971253;9972633;9975409;9975972;9981921;9984751;9985860;9985880;9987962;9989234;9996789;10003182;10004186;10006065;10013813;10014235;10021447;10022902;10023584;10028165;10036718;10037179;10040834;10043108;10044760;10049285;10052839;1006225…
1500	7	132166469	132238045	33	112190	132166469;132184175;132186375;132186472;132189471;132191899;132192499;132192982;132195551;132195632;132196068;132196174;132199671;132199817;132201657;132208323;132211905;132212622;132217342;132218082;132219538;132220255;132221076;132224625;132224967;132224990;132226002;132228087;132229835;132231502;132231661;132234298;132238045
1507	7	24864058	25065572	56	104742	24864058;24868565;24872251;24879095;24883372;24890531;24893081;24894736;24897822;24898218;24903139;24903227;24903667;24906418;24917273;24925960;24931152;24935354;24947629;24950928;24958616;24969869;24982285;24987469;24991216;25002609;25005667;25006114;25006946;25007820;25009149;25010436;25013119;25014039;25014449;25015718;25015819;25017122;25021373;25021958;25025027;25025467;25027761;25031753;250…
1367	6	130450581	130784658	118	148196	130450581;130466956;130470516;130470711;130473026;130475145;130476595;130486437;130487636;130488063;130488369;130488838;130489038;130489244;130489438;130489923;130491257;130491734;130495209;130501733;130511934;130513315;130515795;130516102;130516206;130519967;130529361;130536041;130536107;130542369;130547255;130550825;130551049;130551973;130555686;130556923;130561146;130561513;130567272;130574701…
1504	7	157220486	157445584	104	109637	157220486;157231455;157237958;157238410;157244460;157245299;157246480;157247842;157248171;157263955;157266553;157268425;157269654;157278354;157279717;157283052;157284419;157285075;157285857;157287264;157287345;157290819;157291043;157292888;157294194;157295879;157295911;157296534;157297113;157297944;157298170;157298962;157299088;157299108;157299972;157300107;157300406;157300577;157300845;157302459…
1618	9	73404573	73561536	71	161676	73404573;73404754;73405481;73406463;73412040;73416214;73416867;73421059;73421572;73424508;73424569;73425459;73426743;73426914;73428066;73428337;73428518;73428556;73429131;73429423;73430141;73430339;73430368;73430426;73430544;73431016;73431244;73431566;73432685;73435550;73435851;73436179;73436670;73444920;73445515;73450377;73456968;73462610;73464058;73465213;73465305;73467672;73468025;73468451;734…
1619	9	71178347	71317945	51	161137	71178347;71180476;71180578;71190496;71198224;71200964;71202097;71202229;71202581;71220304;71220722;71223336;71230197;71232927;71233246;71234231;71246231;71248578;71261086;71267268;71267844;71269485;71272537;71275727;71275798;71284849;71286327;71290953;71292547;71294495;71294767;71295432;71295790;71296357;71296403;71300326;71300632;71300791;71302378;71302428;71302747;71307045;71308133;71308722;713…
1613	9	18770891	18935620	78	174588	18770891;18773839;18774026;18779355;18779773;18783767;18785552;18786677;18788190;18789005;18795017;18799582;18801276;18802289;18803199;18804836;18804918;18805163;18806526;18820848;18822433;18822843;18833101;18833974;18834609;18834987;18835274;18835809;18837605;18839696;18841946;18843194;18843586;18843643;18844271;18844298;18844769;18859782;18863898;18867337;18873941;18877385;18877654;18880494;188…
1610	9	23852074	23997866	83	182314	23852074;23852986;23854475;23858462;23859680;23862143;23870350;23871582;23878631;23881616;23882278;23882469;23882956;23887566;23888339;23890924;23891446;23891614;23892676;23894447;23895438;23896954;23896997;23900559;23904662;23905623;23908116;23908498;23909762;23909990;23910076;23914036;23915771;23921089;23921525;23921862;23922448;23922599;23923495;23929045;23931607;23933798;23935033;23942142;239…
1363	6	102643217	103230379	173	152395	102643217;102644983;102649558;102652386;102653720;102669113;102670891;102673094;102674969;102682720;102684020;102685005;102690676;102697183;102697235;102697400;102697983;102698459;102699930;102706491;102707930;102710339;102713053;102717769;102718941;102719840;102724112;102726861;102726908;102731708;102736692;102739105;102742754;102743074;102748586;102752798;102755384;102766587;102770251;102771396…
1143	4	13703012	13787907	69	144045	13703012;13704570;13704689;13707718;13714359;13719182;13724734;13738014;13742374;13743297;13743438;13745233;13747273;13747757;13747998;13749770;13750234;13751237;13753317;13758362;13760029;13760856;13761121;13767895;13770973;13771426;13771955;13772177;13773189;13773288;13774954;13775043;13776208;13777021;13778081;13778129;13778790;13779152;13779167;13779315;13779338;13779357;13779641;13779944;137…
1147	4	30234909	30575138	141	142956	30234909;30236543;30243234;30243958;30248314;30248722;30255615;30255956;30273296;30276437;30276753;30278520;30281202;30281932;30282715;30283134;30283364;30285174;30290428;30297830;30299530;30302332;30304315;30307011;30314635;30315310;30315956;30322345;30322675;30325567;30330095;30334191;30336351;30339413;30350118;30350896;30355210;30358304;30363873;30365476;30365749;30366433;30368808;30369336;303…
1149	4	116338698	116779631	187	140752	116338698;116344117;116345030;116350948;116352228;116354659;116355506;116366215;116367448;116379774;116384330;116384776;116396730;116399643;116400204;116401522;116406117;116412812;116419577;116424602;116425972;116435775;116436678;116437648;116439099;116439675;116440046;116442375;116443217;116455685;116456781;116456952;116456963;116458595;116458908;116460259;116460332;116461116;116461352;116463213…
690	1	175754690	175885560	41	156197	175754690;175759490;175759547;175759769;175761549;175772488;175779676;175786421;175786748;175790580;175795463;175802250;175804240;175813695;175813907;175815350;175815570;175815673;175817659;175818118;175818469;175821362;175822102;175822653;175823562;175829080;175830125;175834001;175834208;175837385;175847630;175850173;175853796;175862771;175865574;175866358;175869789;175874348;175877007;175882159…
691	1	205329419	205484585	62	155013	205329419;205330763;205331999;205332529;205334632;205338968;205340765;205341383;205342351;205342450;205342652;205343478;205349507;205353492;205354695;205355903;205366677;205369097;205370469;205378492;205378588;205382132;205386151;205388175;205393738;205398564;205401840;205402255;205402453;205405368;205405470;205408242;205413038;205422567;205427402;205427644;205428427;205438100;205441907;205442478…
697	1	18327941	18457869	65	145486	18327941;18329962;18330169;18330746;18333467;18333981;18334345;18337988;18338920;18341138;18341622;18342218;18342302;18343298;18349513;18349879;18363801;18365268;18371105;18371530;18371715;18372739;18372805;18377536;18379570;18379743;18386461;18387989;18391816;18397801;18400119;18402715;18406879;18407179;18407217;18407586;18407731;18410025;18410038;18410835;18410971;18411129;18414163;18414637;184…
694	1	230589245	230776997	66	146157	230589245;230590428;230598644;230599287;230602463;230603476;230608309;230608342;230608375;230610548;230612012;230612788;230619385;230619430;230619629;230619824;230620848;230621832;230624940;230625208;230625230;230625732;230629227;230632019;230633289;230634744;230636514;230636745;230638025;230645137;230646401;230654760;230656195;230656549;230658166;230662948;230663368;230663397;230663456;230666349…
698	1	233639423	233860651	79	144517	233639423;233639493;233644419;233644713;233648082;233650589;233659937;233661290;233661658;233662348;233662469;233668100;233673271;233690467;233691238;233691278;233698256;233698316;233700789;233705483;233707022;233717556;233717882;233718784;233721292;233721444;233722554;233727178;233728001;233729350;233731047;233732746;233736167;233737522;233738625;233739220;233741079;233744218;233745034;233745417…
1548	8	2811276	2929235	67	160333	2811276;2811423;2812390;2813735;2814577;2816916;2817479;2820895;2821658;2836642;2837608;2841413;2843663;2849196;2851980;2853462;2858055;2863427;2864001;2866046;2868043;2869683;2870671;2870950;2871043;2871091;2871573;2873506;2874385;2874717;2875750;2879122;2880786;2880871;2881153;2881976;2882174;2883717;2883731;2883777;2884248;2897573;2903932;2904070;2904848;2905155;2905431;2906120;2906150;2906995…
1549	8	5487529	5568212	55	154767	5487529;5494711;5494799;5502622;5504131;5504308;5504808;5504915;5507557;5508042;5508195;5509319;5512249;5512374;5513873;5516304;5517283;5517682;5519442;5520093;5526221;5526534;5528855;5530923;5533035;5533086;5533694;5533740;5533855;5533896;5534799;5535299;5536270;5536867;5542897;5545964;5551602;5553405;5553848;5554645;5555396;5555829;5556051;5556572;5559635;5560242;5561173;5561716;5561877;5561969…
542	17	11821864	12044353	102	168774	11821864;11839017;11843595;11844115;11844907;11847157;11847516;11856857;11858880;11873358;11874361;11880719;11889134;11891614;11900928;11900951;11904332;11904547;11904722;11907167;11912136;11912242;11920840;11923609;11925991;11930468;11931369;11931848;11939166;11940864;11941022;11943904;11951704;11964262;11966403;11973793;11974665;11975731;11980296;11982242;11983562;11985048;11986821;11986873;120…
543	17	38256401	38617890	87	159390	38256401;38263225;38269904;38270067;38273847;38280916;38282670;38285693;38288756;38289614;38290022;38306925;38308334;38312093;38312400;38316877;38325394;38328208;38332022;38333134;38337818;38350667;38355101;38374197;38387093;38403271;38407944;38412542;38432267;38438714;38443629;38445445;38448383;38450248;38452290;38457548;38462006;38464504;38466139;38472368;38474528;38482766;38484060;38485025;384…
546	17	7800139	8221935	136	149505	7800139;7805504;7813276;7824863;7830439;7831863;7833589;7834552;7835773;7844639;7846836;7853480;7854115;7854958;7856237;7856439;7858072;7863305;7866653;7868560;7868687;7868930;7873137;7874410;7874503;7874614;7875062;7875125;7875423;7875633;7877487;7877587;7877720;7877835;7877867;7877956;7878218;7878454;7878860;7879206;7879347;7879824;7880110;7880290;7880436;7886886;7888361;7891606;7893724;7894003…
549	17	36071034	36210933	50	141849	36071034;36074513;36074697;36074905;36075868;36079453;36084261;36090702;36095246;36099858;36104276;36104304;36107869;36108033;36108170;36112156;36112268;36122425;36122952;36128262;36130330;36131296;36131333;36143119;36144109;36144507;36151684;36153828;36158794;36159876;36160158;36162011;36162124;36167273;36168507;36170681;36171018;36171122;36171178;36171508;36174806;36174990;36187767;36189672;361…
1388	6	42013949	42330522	98	123288	42013949;42014057;42015886;42017321;42019622;42022287;42024285;42024634;42025318;42028230;42029271;42029866;42029906;42030645;42030878;42037167;42037348;42037628;42040291;42043264;42044655;42052815;42057655;42058447;42066621;42076564;42091569;42095276;42097886;42099667;42101676;42104149;42104869;42104931;42106384;42111497;42113111;42119445;42123052;42123637;42124483;42133359;42141041;42142922;421…
411	14	41934375	42306774	141	108936	41934375;41936252;41940428;41942267;41949234;41955782;41960048;41960478;41960741;41962088;41979557;41979594;41980129;41981508;41983310;41987936;41988418;41997653;42007118;42009637;42018683;42021730;42026383;42028440;42028454;42029691;42036251;42037717;42038714;42039363;42040258;42049131;42061004;42061510;42070878;42070916;42084220;42089865;42101651;42102936;42103345;42106491;42106683;42107895;421…
413	14	91119996	91300175	65	105432	91119996;91121847;91122100;91122123;91124247;91127264;91128763;91134196;91134903;91141986;91142817;91145851;91146360;91152015;91159104;91163329;91164169;91164759;91165541;91170559;91170861;91174627;91177768;91190212;91194844;91195313;91196949;91197100;91200089;91200183;91202734;91203745;91205283;91205859;91206314;91209677;91210405;91210774;91211121;91212496;91212758;91212912;91217651;91225083;912…
1384	6	72658004	73007671	117	123870	72658004;72665851;72666829;72667970;72671110;72671905;72676098;72678007;72682954;72685620;72688965;72691537;72694887;72703296;72710745;72711404;72713016;72713042;72722574;72724893;72725251;72726964;72730598;72731039;72732987;72742066;72748463;72751108;72751315;72751574;72752340;72752597;72753040;72753441;72754430;72755821;72756463;72759419;72760560;72766079;72770912;72777042;72779492;72783943;727…
1385	6	145658156	146714068	378	123842	145658156;145662672;145669446;145678150;145689370;145689486;145689540;145692147;145692960;145694250;145709964;145710069;145721388;145721503;145728282;145730882;145738174;145738474;145742259;145743082;145745082;145747077;145756163;145757946;145761036;145767146;145769042;145774302;145775790;145775806;145776244;145776336;145777224;145777649;145778043;145778726;145782386;145786607;145787644;145787711…
1383	6	69523995	69826891	96	125255	69523995;69525425;69529644;69533938;69536582;69536924;69542165;69547402;69551541;69553239;69557386;69561451;69567095;69567811;69568729;69583104;69586024;69589566;69589956;69590096;69591585;69593055;69593298;69593308;69593687;69593880;69595427;69597792;69597893;69599051;69606985;69608505;69609089;69619089;69623635;69633081;69635555;69638504;69639853;69642026;69643681;69647534;69653183;69656085;696…
366	14	49348095	49592870	84	193106	49348095;49358835;49368883;49377337;49379912;49379948;49381555;49391570;49394015;49394131;49396760;49397071;49400420;49404512;49409168;49409193;49409453;49409560;49410210;49410835;49411374;49413042;49416369;49416678;49419777;49419881;49420790;49420859;49422639;49423000;49423021;49423557;49423636;49424460;49425425;49427691;49427763;49427900;49429698;49430303;49432478;49434442;49435671;49435903;494…
365	14	57483417	57603226	92	200186	57483417;57483486;57486895;57488749;57489359;57490706;57492378;57495971;57496196;57496535;57497807;57500529;57501500;57504384;57504613;57504652;57504722;57504926;57504941;57507605;57507893;57508381;57513056;57516661;57519938;57526763;57527771;57529091;57531061;57533989;57534205;57540081;57542776;57545114;57547269;57547560;57549096;57549322;57551501;57553911;57554504;57556122;57562211;57563352;575…
363	14	59171113	59860716	264	242510	59171113;59177445;59178014;59178562;59178823;59179402;59185120;59189063;59191152;59196113;59205486;59215676;59217572;59219219;59221002;59221308;59221460;59221994;59222565;59223463;59224793;59225583;59225733;59225846;59226181;59226365;59226410;59226603;59229164;59231395;59234041;59235321;59237415;59246920;59250880;59255333;59255462;59257873;59266812;59267696;59269439;59272141;59272748;59274245;592…
360	14	28482338	29018820	243	266568	28482338;28483226;28483249;28485353;28487536;28492867;28493785;28494317;28500111;28500579;28505843;28508652;28508676;28517524;28519039;28519351;28521736;28522767;28522939;28523891;28529219;28539546;28543928;28544871;28552086;28552385;28555222;28556895;28558012;28559196;28562830;28564042;28572390;28584488;28589457;28591157;28600315;28603023;28603872;28605675;28608735;28609124;28611162;28612047;286…
380	14	82040034	82286326	103	148813	82040034;82041568;82042191;82043690;82044385;82044535;82050822;82061026;82061603;82067440;82068542;82068636;82068768;82068873;82068883;82068894;82069006;82070240;82071653;82072652;82072844;82074226;82074913;82075470;82076352;82081894;82081935;82082227;82084383;82085535;82085982;82094482;82096833;82115277;82115343;82118785;82122246;82126000;82126722;82126889;82131022;82132783;82133088;82134517;821…
381	14	35633653	35856814	83	147798	35633653;35634236;35644518;35644544;35644949;35645941;35647520;35648104;35650371;35650552;35667554;35674130;35679039;35682901;35691153;35691523;35695040;35697205;35698418;35711407;35713984;35722078;35724026;35729811;35732958;35733480;35737873;35741584;35744192;35745081;35755360;35756447;35760062;35760073;35761279;35761967;35765038;35765913;35772605;35775207;35775588;35778469;35780481;35781881;357…
386	14	22016868	22244708	80	138025	22016868;22019076;22027572;22045869;22046396;22048178;22052015;22063770;22067632;22068034;22068764;22081448;22081649;22082976;22087533;22092449;22096995;22103201;22106184;22107199;22108483;22108651;22112522;22116280;22116773;22117407;22127724;22130794;22131000;22132554;22132847;22139069;22140219;22141085;22141565;22143065;22145577;22145935;22148141;22150913;22154285;22156608;22156815;22159287;221…
387	14	63792739	63957456	55	136700	63792739;63793807;63796699;63798231;63802346;63803673;63804154;63807186;63811813;63814177;63818913;63820684;63824535;63825672;63830498;63834408;63836872;63843049;63844259;63844874;63849499;63850859;63859680;63860206;63863471;63871366;63875126;63875819;63876753;63885092;63886921;63887113;63890040;63891852;63891949;63892480;63897482;63898086;63898295;63900259;63909931;63918446;63921590;63923245;639…
388	14	99138753	99276892	52	136317	99138753;99139009;99139684;99140484;99140538;99142868;99143330;99145901;99147668;99149366;99150065;99150529;99152120;99152266;99153190;99155749;99156065;99160189;99162194;99169369;99172460;99174963;99179722;99182559;99186600;99198450;99198810;99201658;99203514;99207942;99212979;99216928;99223104;99223643;99227422;99230165;99233533;99237643;99239283;99240740;99248996;99249020;99249175;99251517;992…
389	14	105650945	105769502	55	133975	105650945;105654334;105655790;105655853;105656447;105672471;105676084;105676378;105678098;105679080;105682862;105683505;105684546;105685728;105686776;105686994;105687413;105687795;105688300;105692176;105694592;105695431;105695645;105710050;105710360;105710501;105713280;105714379;105714457;105718623;105719124;105719580;105720013;105723423;105723709;105726457;105726596;105728276;105728383;105728932…
258	12	121266425	121599829	78	117893	121266425;121266522;121272789;121273732;121285966;121291507;121295452;121303509;121308105;121318770;121330980;121334696;121339698;121355485;121355851;121364252;121364323;121364392;121367012;121372005;121378877;121383662;121386617;121390462;121399932;121402199;121408211;121419089;121419822;121422243;121430329;121430618;121440510;121442241;121442385;121444601;121445761;121449697;121453645;121454148…
259	12	68925575	69319507	99	117807	68925575;68926154;68927987;68931782;68932176;68932696;68933342;68937924;68938759;68939561;68941402;68946612;68947986;68948482;68951603;68953671;68955739;68957091;68957390;68960259;68962767;68963651;68966779;68966804;68967073;68967224;68975927;68977014;68978924;68981470;68982683;68985900;68990767;68993759;69005988;69007464;69021247;69028938;69045465;69047031;69049861;69051101;69051227;69058364;690…
169	11	43563384	43845813	101	109103	43563384;43580570;43581153;43582712;43586146;43593483;43593554;43602642;43607714;43615436;43615615;43617103;43618609;43619060;43624170;43628790;43634268;43636466;43644821;43645810;43646138;43647080;43648313;43650331;43651170;43651244;43657761;43662642;43663975;43664452;43665248;43670972;43677721;43679570;43681802;43685772;43687594;43691193;43693726;43694182;43694236;43696435;43698000;43698849;437…
166	11	119500716	119631231	54	116152	119500716;119503006;119505547;119522397;119528985;119532321;119538431;119543866;119544502;119544968;119545571;119552339;119552497;119553610;119554030;119555451;119556347;119558302;119559027;119560909;119561336;119561687;119561796;119562356;119564313;119567831;119570098;119571751;119572644;119574180;119575805;119578542;119581071;119582837;119583551;119585316;119593512;119601380;119602104;119602530…
161	11	11481485	11688700	74	120870	11481485;11481684;11482097;11485261;11485539;11485924;11487915;11489347;11492207;11500205;11513254;11513406;11516743;11518018;11520431;11524658;11530287;11535255;11535325;11537403;11544568;11547530;11551130;11569020;11571744;11575213;11576453;11576549;11576924;11578241;11582784;11586257;11589168;11589901;11590971;11591675;11594572;11596334;11597453;11598866;11601552;11608922;11613527;11630216;116…
679	1	162131127	162311719	82	171528	162131127;162133661;162134319;162138774;162138802;162138871;162139191;162141852;162145955;162147670;162149018;162149794;162150104;162151093;162152307;162152603;162152644;162153184;162154038;162154224;162155428;162157061;162157654;162158571;162158610;162158777;162158825;162158839;162159775;162166745;162167607;162167742;162173149;162176695;162177118;162183793;162184218;162190613;162191193;162198657…
1603	9	136618591	136757406	50	211190	136618591;136627016;136627955;136628248;136635364;136641985;136642740;136643545;136646767;136646781;136650059;136654130;136654176;136654789;136655250;136658613;136660949;136663426;136663827;136665497;136665661;136666012;136669307;136669539;136676653;136679471;136681904;136682925;136683205;136684651;136686921;136691506;136700253;136701726;136704888;136705848;136709910;136714496;136715258;136716742…
800	20	18124915	18279104	56	120098	18124915;18125441;18130037;18133216;18133446;18134426;18141022;18143117;18144731;18145071;18151698;18152424;18157255;18160922;18167977;18170962;18173296;18173707;18183651;18185462;18192411;18193454;18200690;18201555;18203118;18204286;18206294;18207525;18207557;18207897;18208769;18211589;18213964;18214097;18216850;18223999;18227901;18228553;18230694;18232246;18232861;18232902;18234207;18234346;182…
804	20	55470391	55646066	60	106459	55470391;55471296;55471786;55472511;55473183;55476224;55478599;55478966;55479163;55479594;55479717;55484290;55485876;55487333;55493474;55495571;55508572;55508904;55510139;55512764;55515040;55528578;55531578;55532459;55537024;55538277;55540680;55546489;55552146;55553490;55567118;55574261;55574597;55582869;55588062;55588855;55589766;55590989;55594141;55594277;55596243;55596268;55600138;55600624;556…
608	19	30169761	30346263	55	201166	30169761;30174485;30176192;30176372;30179782;30192449;30193535;30201298;30214597;30214794;30216619;30216683;30228458;30228534;30229567;30230298;30244559;30244612;30248429;30248760;30252100;30252187;30252281;30255718;30256588;30257857;30258742;30259138;30260502;30260512;30260528;30261038;30261756;30261994;30267353;30274438;30278928;30282131;30301844;30301869;30307338;30307451;30310879;30312874;303…
1154	4	181644985	181730082	52	136664	181644985;181649890;181651341;181658296;181660540;181663227;181666304;181668824;181669286;181670038;181672466;181673418;181673521;181680624;181684618;181688230;181688700;181691957;181693058;181693170;181693215;181693802;181694153;181695314;181695983;181696005;181696371;181697150;181697678;181697946;181698733;181699658;181699779;181700030;181700406;181700802;181701516;181703378;181704615;181706646…
1156	4	115843970	116163489	161	135519	115843970;115845183;115849969;115850410;115852473;115853732;115856885;115857026;115859892;115861557;115862939;115863395;115863444;115867518;115870115;115872664;115875256;115878376;115882487;115896574;115898215;115901088;115903926;115903989;115904005;115906463;115907378;115907707;115908681;115908780;115909407;115910317;115917443;115921068;115922081;115925423;115939309;115939442;115940348;115940703…
1153	4	107504932	107824201	118	137449	107504932;107508179;107510685;107516438;107519060;107522168;107522449;107526011;107527751;107529902;107531324;107533323;107533786;107538534;107538858;107542681;107545400;107546614;107548494;107552327;107553424;107556452;107556690;107563227;107563644;107563657;107566185;107570204;107570687;107571157;107571248;107572436;107575184;107578052;107578672;107579641;107580388;107583233;107584001;107588170…
1551	8	131785537	132342706	172	151623	131785537;131789469;131793283;131801046;131801917;131813167;131816901;131825884;131826956;131827131;131827593;131829084;131844434;131853111;131853388;131858271;131859435;131861566;131863550;131864152;131864351;131869997;131872161;131877433;131883195;131887028;131896194;131901803;131902367;131907393;131907837;131908694;131908770;131909647;131910674;131914210;131917168;131926367;131926382;131929110…
1550	8	1068080	1160641	46	151754	1068080;1081608;1083123;1083252;1084298;1084906;1087125;1088315;1089029;1090099;1093322;1093683;1096308;1098989;1103621;1103965;1104864;1105088;1107174;1110445;1111275;1112469;1113100;1113629;1114857;1121833;1122268;1123638;1126653;1127008;1129445;1129950;1134318;1134750;1135886;1143432;1144159;1144379;1146508;1147286;1148260;1150862;1152975;1154894;1160299;1160641
1557	8	21216240	21324692	45	136007	21216240;21217286;21219454;21221179;21223083;21224939;21225809;21235493;21239003;21242671;21248299;21257936;21259258;21259821;21260364;21266533;21266725;21267296;21269757;21270002;21270560;21275107;21275469;21276555;21277367;21279202;21280287;21283485;21283969;21284580;21285291;21287958;21295234;21297748;21298402;21300117;21304145;21306391;21309158;21313277;21315968;21316022;21316509;21324426;213…
1556	8	103044131	103490710	180	139050	103044131;103047373;103049766;103056089;103056531;103058162;103058695;103059940;103063897;103065970;103072947;103073768;103078881;103080564;103080634;103080690;103080810;103081264;103082068;103083081;103083704;103086647;103086789;103086976;103087285;103087298;103087322;103087756;103087849;103087896;103087974;103089159;103095020;103097145;103102086;103106568;103110381;103111516;103113727;103116967…
54	10	94847097	95356058	149	144892	94847097;94849566;94860602;94876967;94877011;94877582;94879191;94880256;94881305;94885164;94885567;94886488;94889905;94892052;94892735;94894346;94898436;94899077;94905911;94906803;94906907;94911897;94916604;94917160;94917674;94922299;94924916;94930559;94942204;94949831;94956499;94969864;94973883;94981296;94982364;94982805;94985926;94986871;94987520;94988556;94990834;94994070;94996117;95000543;950…
56	10	3100437	3132515	33	141392	3100437;3101325;3102000;3106239;3106281;3107307;3107338;3107539;3107607;3107745;3107796;3107896;3108213;3108420;3108507;3111685;3111797;3112575;3112709;3112944;3113176;3113232;3113362;3113386;3113450;3114288;3118835;3118937;3121320;3128438;3131564;3131652;3132515
51	10	10632512	10775163	77	148088	10632512;10633729;10638411;10640455;10643040;10647320;10650148;10651245;10651825;10657203;10659465;10669828;10670464;10677525;10679563;10682231;10685686;10687496;10692050;10692412;10704382;10715339;10715600;10716604;10717041;10723734;10724869;10724883;10727196;10727832;10728435;10728820;10729194;10729407;10729648;10729691;10729718;10731239;10731656;10731800;10731860;10731887;10732234;10732366;107…
53	10	62043574	62314175	103	146328	62043574;62052806;62052931;62053391;62053459;62054758;62056016;62056782;62057733;62058726;62064095;62064308;62064568;62066303;62067143;62068457;62068483;62068568;62068665;62073282;62074611;62081469;62086814;62087227;62088406;62094231;62095133;62095877;62096916;62100988;62102829;62113322;62115366;62122162;62123421;62125894;62127943;62129652;62131937;62141903;62142798;62153083;62154446;62161477;621…
52	10	134040139	134175974	64	146675	134040139;134041177;134041683;134043825;134043971;134044379;134047081;134058567;134058797;134060197;134062041;134063561;134065109;134067882;134079742;134079870;134079955;134080770;134080902;134083349;134084288;134085434;134086435;134087028;134087191;134088317;134088696;134089021;134092780;134096487;134096927;134097201;134100509;134100532;134101752;134102337;134102740;134107045;134115141;134118906…
535	17	34052157	34280480	84	227976	34052157;34053701;34053839;34055591;34057341;34061486;34066198;34069578;34071647;34073301;34077412;34077748;34077876;34077954;34077993;34078217;34078373;34080207;34082578;34084821;34085189;34085539;34086026;34086159;34086665;34086947;34086980;34087510;34089251;34093472;34093597;34093663;34095971;34100707;34101769;34101780;34101844;34104195;34106884;34112705;34112718;34119311;34121144;34124062;341…
534	17	14953334	15032527	67	229537	14953334;14953385;14953806;14956451;14957156;14959188;14961239;14962430;14962576;14962734;14964787;14966160;14968384;14968496;14973207;14973450;14974798;14974949;14975209;14975478;14975578;14976688;14981941;14985031;14986548;14987989;14989236;14990070;14990201;14990244;14990285;14990487;14991196;14992346;14992816;14993310;14993927;14994297;14994526;14994610;14995403;14995437;14995458;14995550;149…
533	17	65469817	65583036	48	230782	65469817;65473124;65483644;65483726;65483952;65485378;65485681;65489775;65491616;65492648;65492939;65494278;65499524;65505047;65506486;65513788;65515013;65516528;65529179;65531974;65535164;65535634;65537856;65539463;65539511;65542698;65544655;65546046;65547046;65550025;65551501;65556629;65559582;65562974;65563910;65564375;65564529;65566087;65570903;65572757;65574490;65579382;65580761;65581861;655…
538	17	12375116	12664400	94	194343	12375116;12376811;12378991;12381019;12381952;12392251;12392723;12394245;12395912;12401480;12404347;12407966;12408660;12409746;12410949;12414871;12415273;12416901;12417626;12421029;12421433;12421632;12421681;12423696;12426457;12428694;12431651;12434948;12437817;12438253;12446163;12447859;12450319;12454365;12467464;12468825;12477403;12483119;12494132;12498400;12501776;12511316;12512952;12517716;125…
1398	6	53943827	54288926	134	115404	53943827;53945170;53946501;53948515;53949632;53952034;53954001;53957002;53960607;53960682;53967103;53968890;53969474;53971008;53972139;53979873;53983907;53985317;53985329;53991260;53993477;53998194;53999622;53999695;54002243;54003246;54004539;54013403;54013759;54023612;54027639;54029402;54035618;54046626;54051830;54056653;54063231;54067650;54077283;54077617;54079925;54090566;54094946;54103718;541…
423	15	52392903	52588156	102	305901	52392903;52393877;52395083;52400460;52401282;52403094;52406896;52412084;52414080;52416404;52417773;52417863;52418027;52418268;52418453;52418480;52418666;52419154;52419287;52422475;52427604;52428639;52429225;52431972;52432185;52432204;52432270;52432819;52434592;52435903;52436165;52436364;52436620;52437057;52438069;52440671;52443175;52443474;52445377;52447567;52448656;52451770;52452413;52452435;524…
422	15	92418760	92722532	119	312612	92418760;92420515;92420632;92421696;92424132;92426748;92436664;92439235;92441169;92441475;92442099;92443422;92443856;92443866;92444871;92447710;92451189;92451905;92455604;92456012;92456683;92456897;92457507;92458348;92458760;92466459;92466670;92467338;92471122;92471335;92473388;92474060;92478315;92478394;92482480;92486782;92487625;92490508;92490661;92490859;92492558;92493335;92494225;92495219;924…
427	15	87440147	87692380	200	266834	87440147;87446446;87447090;87448878;87449347;87449974;87451761;87454292;87455116;87455918;87456054;87456125;87456316;87457720;87457923;87458330;87459854;87459910;87459921;87459984;87460113;87460429;87466287;87466989;87467296;87468643;87470192;87470850;87470983;87471890;87473283;87474947;87475038;87476703;87477373;87478803;87479083;87482640;87482981;87484240;87484645;87491551;87493126;87493281;874…
227	12	63057324	63231626	79	155133	63057324;63060608;63060634;63063031;63063187;63069445;63074600;63082671;63084713;63084926;63085233;63086425;63087304;63088574;63088672;63088930;63089562;63092862;63094017;63096386;63110950;63114782;63115863;63117284;63118057;63118640;63119874;63123356;63124492;63137172;63147937;63150835;63151367;63152625;63154160;63158954;63167150;63167264;63179929;63189320;63191927;63199004;63204191;63204333;632…
226	12	132333682	132567327	126	156645	132333682;132333893;132338464;132340230;132345600;132346401;132346703;132346823;132350112;132350139;132350429;132359511;132359533;132361935;132381559;132392171;132400028;132400420;132402324;132405820;132405879;132406162;132416065;132416633;132416813;132418423;132423893;132428250;132429846;132431989;132432726;132433275;132438196;132439413;132439913;132442804;132447548;132454237;132455376;132455720…
225	12	92068053	92374947	145	158080	92068053;92078443;92080720;92081769;92086620;92087860;92089417;92095624;92096240;92096575;92097259;92100469;92100671;92101849;92103567;92104261;92106678;92107579;92108286;92110448;92115034;92116438;92116874;92119033;92121066;92121194;92125332;92131151;92131185;92132268;92132281;92133626;92133925;92135945;92137358;92137877;92139636;92139737;92139943;92140931;92140984;92142978;92143059;92143255;921…
224	12	17372323	17624841	87	161469	17372323;17372592;17374927;17376220;17380993;17386934;17388895;17397742;17405934;17408072;17410550;17410718;17411554;17412266;17416275;17425538;17426301;17427512;17427691;17438184;17447180;17450295;17451740;17454963;17455271;17457773;17460370;17461245;17475001;17478622;17483471;17488051;17489909;17490454;17491807;17492176;17497795;17505463;17506964;17508859;17519707;17525119;17532603;17532763;175…
222	12	38972282	39728286	252	164634	38972282;38973146;38985994;38986911;38989749;38989764;38998249;38998433;38999879;39003459;39009953;39022313;39023142;39023475;39024730;39030280;39031519;39032991;39033649;39035025;39042019;39046145;39048871;39050425;39051947;39053291;39056015;39059348;39064165;39067196;39067567;39072221;39073233;39075431;39076246;39079248;39079610;39079710;39083154;39085963;39086904;39087708;39088755;39097623;390…
151	11	20779325	20972532	81	129256	20779325;20781270;20782531;20783003;20783437;20791966;20794926;20795283;20799062;20799304;20799861;20801689;20803271;20806872;20807310;20808929;20809023;20809131;20809150;20809717;20809888;20809964;20810224;20810458;20810717;20810827;20813177;20814891;20815069;20817828;20821292;20821828;20825208;20825740;20828849;20829720;20830561;20831533;20850230;20852613;20853221;20854719;20856940;20858979;208…
152	11	89851149	90201327	121	128779	89851149;89857722;89869614;89870410;89871030;89871227;89873349;89873389;89880116;89886693;89895001;89896640;89900629;89901497;89904716;89909619;89915390;89917968;89919622;89923485;89923605;89924001;89928351;89936706;89953424;89960649;89962490;89963514;89964838;89966092;89968035;89968952;89971568;89977180;89982733;89982833;89984319;89987452;89987505;89987770;89990932;89995489;89996325;89998964;899…
1524	8	13951959	14394394	182	243129	13951959;13955788;13955898;13963152;13967918;13971870;13978139;13978644;13979844;13979875;13980364;13981490;13987214;13994725;13996450;14016058;14023668;14032507;14035045;14037400;14042304;14045180;14048430;14049760;14054248;14054816;14056214;14061557;14062438;14063948;14064020;14068740;14068914;14068969;14069540;14070778;14071361;14071499;14071663;14072897;14073313;14074598;14074927;14075987;140…
1544	8	2404208	2666831	111	168827	2404208;2404733;2419786;2420737;2423991;2424151;2425250;2431245;2432655;2435933;2436661;2437419;2442248;2446663;2451457;2454782;2456867;2457766;2458783;2459100;2460434;2462058;2472990;2479110;2481208;2481831;2481925;2481967;2482078;2486614;2494960;2495598;2495977;2496360;2498174;2499279;2502588;2509389;2509602;2512877;2521648;2523719;2525566;2528875;2529475;2534124;2534253;2536081;2536407;2538824…
1526	8	18602568	18903650	157	236682	18602568;18606291;18606637;18606977;18608651;18611659;18611744;18612578;18612698;18615127;18615389;18615564;18616227;18617331;18618715;18630471;18630664;18632276;18633172;18635294;18635441;18635514;18637360;18640126;18640335;18642252;18642879;18643698;18644914;18644951;18645009;18645940;18646968;18657300;18675103;18675545;18675706;18675780;18676008;18676228;18676746;18678943;18681562;18686287;186…
0	10	136274	751425	288	459670	136274;141708;158101;159038;162717;165281;168426;169683;171324;172098;175149;184616;188859;193279;197167;198081;199652;203133;213152;213722;216183;216680;219558;222329;222744;223877;226224;232999;240346;242319;245094;246559;252682;253367;253508;253690;255249;257036;259901;260588;261398;267580;271017;272459;278739;278811;281703;283058;284938;285164;285806;288871;291973;296056;296527;298735;305308;…
812	21	46435946	46743070	147	344526	46435946;46436814;46437134;46439482;46442925;46443413;46445709;46446001;46446097;46446211;46446354;46447571;46447940;46450083;46456737;46463969;46463991;46464252;46464379;46464697;46465615;46466320;46469002;46470395;46471199;46471564;46471635;46474289;46480815;46483828;46483868;46487762;46493311;46499033;46499474;46500380;46502096;46502626;46504505;46506784;46507591;46508052;46509889;46509908;465…
815	21	30905697	31196557	92	198010	30905697;30910776;30913678;30919510;30925507;30934714;30941463;30955464;30961186;30964807;30965040;30966802;30966985;30968209;30969450;30969759;30970194;30973325;30980249;30984939;30986229;30998064;30999087;31002248;31007190;31008793;31010726;31019929;31020018;31024255;31024455;31026647;31027455;31027511;31028123;31031350;31036030;31048384;31049110;31052908;31060116;31070537;31073320;31079343;310…
816	21	15491294	15840020	143	197823	15491294;15492653;15492689;15492946;15498807;15499641;15499796;15500371;15502912;15507966;15508316;15508746;15509538;15511975;15512381;15515039;15516012;15518352;15520132;15520265;15527816;15533526;15537944;15539766;15540322;15540651;15540895;15541102;15542450;15544387;15546000;15548670;15548798;15550182;15550435;15555649;15556758;15558346;15558464;15562655;15566804;15566918;15567181;15568786;155…
1523	8	89335100	90204940	336	271944	89335100;89352829;89354316;89354612;89357706;89363033;89363741;89363996;89364390;89367285;89371795;89383383;89383473;89392806;89394211;89395125;89396041;89397741;89398364;89399936;89400773;89403127;89406412;89418817;89422823;89438102;89438957;89446600;89452585;89456793;89456870;89460906;89466059;89466297;89470033;89470497;89472752;89474828;89481047;89482440;89485880;89486890;89491139;89491388;894…
1490	7	20127250	20253406	59	120933	20127250;20134067;20135650;20136100;20145038;20149215;20150151;20155783;20157027;20157104;20159473;20160497;20163513;20165372;20165569;20182080;20184239;20185306;20186480;20189052;20190237;20190268;20191291;20192081;20195554;20196756;20200922;20202779;20203559;20203773;20203856;20204122;20204411;20204957;20205068;20207828;20208711;20209352;20210438;20212294;20214672;20215445;20217701;20219792;202…
1493	7	46323827	46688629	183	119516	46323827;46323970;46324724;46329673;46332623;46333094;46334594;46334675;46335188;46335620;46337559;46339039;46339075;46345025;46345819;46347745;46351213;46352512;46352593;46353356;46360746;46360963;46361063;46361428;46361603;46363393;46363690;46365907;46369871;46371713;46373237;46375616;46380708;46380833;46382525;46382903;46383369;46383484;46384006;46384405;46384660;46384738;46384795;46385122;463…
1494	7	20640760	20702562	45	115290	20640760;20641038;20641270;20641635;20642173;20642198;20643760;20643839;20644787;20647794;20648253;20653478;20653986;20654168;20655153;20656250;20656305;20656505;20657009;20662524;20663069;20663096;20663898;20665141;20666588;20667427;20668633;20669814;20671281;20671782;20676909;20676984;20679471;20679568;20679657;20680049;20680130;20680322;20680353;20683939;20689015;20690776;20701571;20702294;207…
1496	7	5626734	5835108	74	114252	5626734;5626912;5627773;5630619;5631133;5647118;5654935;5659715;5671431;5672468;5677318;5677922;5678653;5683374;5691103;5691982;5693505;5697010;5697101;5697620;5701398;5701439;5701993;5710024;5710460;5718009;5720789;5721154;5724822;5725458;5725580;5726142;5726313;5734911;5737639;5740956;5743451;5745918;5747718;5748476;5748957;5755818;5756155;5756817;5759087;5759373;5778467;5778791;5778847;5782681…
1396	6	79174840	79376092	70	116393	79174840;79175071;79175617;79175901;79176759;79177557;79178004;79179948;79180181;79180526;79181096;79182442;79184412;79185990;79186835;79189031;79198142;79200267;79209012;79218955;79220908;79224396;79229620;79230878;79233612;79234206;79235303;79236207;79237116;79238196;79248564;79255569;79259329;79266363;79268310;79280064;79282845;79283354;79291054;79293875;79294950;79296840;79300584;79315312;793…
1499	7	44201149	44303842	65	112234	44201149;44205514;44205605;44206394;44206682;44212285;44215871;44216112;44218794;44219742;44221295;44222220;44223295;44223558;44225486;44225829;44226688;44226944;44227285;44227897;44228636;44229232;44229320;44231237;44231310;44231592;44232589;44232613;44232878;44232918;44233345;44234428;44234713;44234860;44236363;44239715;44241896;44244494;44246534;44246733;44248628;44248720;44252018;44253021;442…
1394	6	156136203	156285023	47	118218	156136203;156137934;156145415;156149063;156150689;156151835;156152652;156156451;156157397;156162827;156171848;156172960;156173838;156179148;156180813;156181121;156185154;156194551;156201497;156207450;156213944;156216335;156220011;156220301;156225494;156227678;156233047;156245356;156245991;156246292;156247252;156251619;156253360;156255551;156258450;156258524;156261973;156266694;156268052;156270992…
425	15	34032685	34199022	99	277286	34032685;34034125;34034817;34035016;34037119;34037297;34038106;34044475;34044545;34044858;34047074;34048467;34048707;34049162;34051034;34051314;34051666;34052159;34067330;34083293;34089121;34089358;34089734;34089829;34091030;34091248;34092407;34101515;34101628;34104663;34107876;34115281;34115562;34115628;34115924;34116083;34116112;34116290;34129723;34130697;34132246;34132872;34138483;34138840;341…
1391	6	100984092	101613299	216	121370	100984092;100996627;101005163;101006820;101017538;101026866;101027208;101030400;101033151;101034434;101040232;101043738;101050706;101053683;101053886;101054745;101058211;101060888;101061750;101062676;101067213;101070636;101070752;101072381;101072541;101073707;101078513;101079270;101080561;101086741;101087719;101087964;101088514;101095613;101096664;101102591;101104494;101105234;101107060;101112612…
1628	9	1180010	1266073	52	145004	1180010;1180146;1181555;1182923;1184039;1185810;1186742;1187309;1187776;1187899;1188346;1188909;1191047;1191220;1191584;1192205;1194241;1194338;1195795;1198313;1198772;1199742;1203551;1204134;1206476;1209103;1209671;1209994;1211563;1215293;1219319;1220100;1221428;1221668;1232184;1232267;1234134;1236703;1245504;1246260;1249754;1250791;1252868;1253534;1255117;1257840;1259185;1261152;1261865;1262951…
1120	4	11851726	12208450	126	195067	11851726;11852395;11855298;11859713;11860608;11863025;11864534;11867429;11867561;11870340;11872338;11872746;11873328;11874690;11875473;11877834;11881106;11883219;11884030;11889844;11903936;11909110;11910105;11914768;11916359;11916673;11917610;11930431;11944355;11944440;11952309;11957518;11961115;11961610;11968558;11975107;11980743;11988822;11992730;11994169;11996477;11997820;11999481;12000553;120…
1121	4	189806382	190016715	100	186032	189806382;189810439;189811498;189814427;189816201;189816663;189821883;189823323;189823429;189824005;189827146;189827198;189828001;189829427;189831599;189834427;189836265;189836590;189837409;189837474;189837788;189838633;189840144;189841288;189842080;189842291;189842307;189842854;189843001;189843519;189843651;189843774;189844918;189844993;189845202;189847375;189847692;189849636;189851987;189854593…
1123	4	127546513	128786519	428	179464	127546513;127553271;127554025;127559453;127561687;127563189;127566337;127568857;127569055;127570808;127572265;127572529;127573953;127574049;127574239;127574268;127574305;127574383;127574486;127574790;127577046;127578147;127578589;127579268;127580510;127580539;127582460;127582812;127583502;127585474;127585571;127586315;127587154;127587226;127588803;127590106;127590604;127590857;127591138;127591216…
1125	4	157488226	157814336	127	167796	157488226;157488882;157489857;157489999;157490885;157491095;157491802;157491881;157492182;157495624;157496714;157498191;157499086;157499773;157499891;157499949;157500025;157500285;157502208;157504162;157507427;157507585;157508109;157509114;157509894;157510383;157514384;157516167;157518336;157519841;157521496;157521693;157523482;157525434;157529049;157530408;157531827;157531975;157542692;157547040…
1126	4	152805078	153095097	102	165825	152805078;152806922;152813726;152819567;152819711;152820463;152820593;152826818;152838775;152839540;152844175;152845606;152855538;152855935;152858786;152861550;152862582;152863256;152875086;152875937;152876160;152877177;152877202;152877308;152879796;152880512;152882458;152886787;152891323;152893193;152895001;152897448;152898734;152899593;152903568;152913524;152914555;152915263;152915475;152925397…
524	16	55279760	55403138	44	106545	55279760;55283176;55289641;55293823;55298145;55308816;55309715;55314350;55314783;55316584;55319684;55325128;55325872;55326640;55327154;55330424;55333244;55334378;55338830;55339154;55341249;55344132;55346961;55347349;55349466;55351112;55351176;55352216;55353766;55355923;55360283;55367404;55373318;55376895;55384259;55390361;55391770;55393202;55396114;55396295;55396849;55397497;55398439;55403138
1014	3	21713546	22103146	158	171182	21713546;21714599;21714934;21716151;21716513;21718522;21718633;21719283;21719476;21720374;21728780;21730246;21731281;21737095;21740189;21743019;21749644;21749769;21752879;21754346;21755993;21770259;21776520;21781737;21782164;21782663;21788882;21789160;21795098;21796468;21801584;21802000;21802174;21805121;21805282;21805305;21805928;21806038;21806904;21812274;21814403;21815184;21818777;21820100;218…
1015	3	54173211	54379685	78	167616	54173211;54176218;54176440;54178050;54182415;54193086;54194304;54194960;54196483;54197638;54197753;54198274;54200720;54202908;54203531;54204397;54206572;54206661;54208898;54211086;54219289;54222180;54222466;54226657;54233372;54233437;54234833;54243419;54243931;54246467;54249007;54249109;54249267;54249282;54250951;54251385;54261327;54266102;54278423;54286212;54287575;54289945;54293799;54294535;543…
1017	3	16760369	17120556	104	165125	16760369;16760422;16761941;16768239;16772472;16783524;16788965;16790184;16791684;16797660;16798928;16799247;16799871;16800902;16801152;16805109;16811642;16812908;16813120;16814175;16820813;16823003;16823222;16823247;16823955;16824390;16827659;16828143;16836385;16853843;16857055;16857123;16858137;16858772;16862223;16872683;16874701;16879092;16880054;16889281;16889345;16893711;16893750;16894141;168…
528	16	4692033	4814177	70	104894	4692033;4693648;4695949;4696772;4702943;4703540;4709993;4710241;4713115;4714998;4717453;4720128;4720433;4720819;4721840;4721933;4725844;4725920;4726375;4726557;4726613;4726637;4728705;4728862;4729992;4730264;4730870;4731336;4731976;4732122;4732224;4733282;4734272;4734311;4734420;4734706;4737950;4741109;4741768;4742127;4750248;4750849;4751004;4754659;4755108;4755387;4755413;4764320;4765403;4769208…
1234	5	65912397	66141691	78	163379	65912397;65914432;65915016;65923198;65928913;65934464;65935710;65935743;65938409;65942046;65947358;65947553;65951282;65961195;65965899;65966232;65972325;65972651;65977650;65980953;65982668;65984294;65994164;66001994;66003906;66004023;66005011;66006337;66007186;66019289;66021802;66024356;66024916;66025142;66029006;66031176;66035312;66036388;66038254;66039087;66040376;66041576;66043841;66044111;660…
1235	5	19490291	19915685	168	161984	19490291;19493579;19495190;19495200;19498301;19503460;19506351;19506402;19507005;19509391;19511170;19511356;19515008;19515729;19517503;19518325;19519361;19520665;19526334;19528850;19530101;19532022;19538128;19539663;19550012;19550834;19551849;19557615;19561240;19564491;19577896;19579755;19580293;19585284;19595764;19597519;19603650;19613801;19614509;19615806;19617326;19617477;19618098;19619407;196…
1230	5	2743973	2833124	41	168042	2743973;2756852;2757917;2761207;2764013;2766440;2768777;2770463;2771172;2773805;2778426;2779848;2782333;2785733;2786959;2787270;2788406;2788835;2789912;2792359;2793008;2794983;2797588;2800361;2801945;2802518;2803408;2804059;2806830;2808510;2808881;2808927;2812865;2813630;2813712;2814499;2816986;2818984;2820990;2825544;2833124
238	12	3353562	3460390	42	141957	3353562;3353822;3353862;3354916;3356286;3359506;3364536;3367086;3368139;3373823;3375780;3379139;3383989;3388713;3390197;3390803;3392663;3393100;3402031;3402644;3404101;3405787;3407835;3409746;3411061;3411307;3412253;3419756;3421568;3421811;3440081;3448143;3448799;3450180;3450928;3451093;3451721;3453848;3457799;3459454;3459711;3460390
239	12	101862176	102079197	69	140138	101862176;101862585;101863385;101867367;101876456;101884399;101887222;101893342;101893810;101894665;101895763;101895936;101896996;101901433;101905641;101907497;101909380;101909415;101909964;101910729;101911912;101918001;101918819;101921346;101922402;101924016;101925322;101927608;101936329;101940364;101947898;101948241;101950563;101952192;101952531;101952570;101953104;101956390;101956720;101961700…
236	12	104130847	104239857	70	143806	104130847;104131155;104131189;104131232;104131255;104136316;104137310;104149689;104151931;104154375;104157234;104161253;104163425;104177338;104181616;104183718;104183952;104184884;104185164;104185661;104186995;104188770;104190869;104191696;104193086;104194263;104197143;104197523;104202160;104205100;104206092;104207414;104207870;104209446;104209661;104209772;104210068;104210240;104211278;104211454…
231	12	22110749	22457635	99	149308	22110749;22111685;22112031;22117688;22122207;22122397;22129209;22132194;22133619;22138028;22144347;22155977;22160300;22161333;22164187;22165562;22168925;22169484;22174937;22174952;22177156;22183914;22184206;22184558;22187832;22197751;22215683;22223688;22231096;22231164;22232395;22236791;22238815;22240816;22247996;22250886;22253176;22255631;22257144;22258068;22261713;22262680;22264618;22268399;222…
232	12	33021103	33373196	105	148508	33021103;33026909;33030644;33032865;33051032;33054061;33056676;33064290;33082627;33085614;33090604;33094713;33097430;33100911;33101090;33102167;33103053;33103985;33107285;33110158;33112671;33112918;33117661;33121178;33123890;33124525;33126857;33129300;33129394;33130139;33130471;33142052;33153704;33155401;33156812;33162910;33167227;33167584;33169043;33171336;33171698;33173242;33176417;33177089;331…
233	12	18903533	19169208	139	147157	18903533;18907381;18911080;18911248;18911353;18913291;18913920;18915342;18915859;18917329;18918128;18923545;18926365;18927027;18927364;18928751;18928795;18929148;18929391;18929661;18929685;18929817;18930351;18930497;18933992;18935102;18935188;18935744;18935834;18935917;18935939;18936078;18936214;18936567;18936929;18937116;18937627;18938091;18938166;18939146;18939252;18940114;18940397;18940891;189…
1	10	120975780	121284041	159	434503	120975780;120978635;120982220;120982988;120983634;120983944;120984012;120986431;120987327;120989756;120989971;120992682;120992994;120997227;120997432;120997794;120998250;120999407;121000697;121002923;121003335;121003509;121006369;121006613;121007135;121007305;121007499;121007688;121007704;121007818;121008865;121009355;121009393;121009605;121009798;121010234;121011957;121012241;121012315;121013057…
146	11	86275858	86561299	114	143592	86275858;86282604;86285915;86289747;86299188;86303092;86309101;86309476;86309601;86310251;86310972;86317733;86323416;86323532;86333661;86336082;86339950;86341332;86345365;86354438;86354526;86362418;86364636;86370921;86372228;86387504;86388108;86389871;86390578;86391058;86392928;86394496;86395711;86398024;86398092;86398335;86398573;86399207;86400733;86401972;86403868;86406507;86406601;86407041;864…
147	11	33718527	33861917	51	143218	33718527;33719184;33722594;33727671;33733402;33740776;33749895;33749976;33760296;33761350;33765839;33767966;33772732;33775265;33783437;33789563;33792611;33793170;33797290;33798422;33798459;33799685;33812171;33816316;33818120;33820821;33821860;33824890;33828414;33828430;33828621;33828648;33828766;33829028;33829180;33829213;33830259;33830376;33830395;33830454;33833296;33833960;33835584;33835612;338…
140	11	97799649	98360566	155	149962	97799649;97807764;97808622;97820785;97824589;97827856;97829778;97834635;97835905;97836172;97840923;97841094;97841324;97845161;97851199;97857464;97862928;97865848;97871272;97872368;97875149;97882872;97883315;97884623;97895884;97898099;97900507;97901368;97902243;97903759;97907161;97908863;97909969;97914953;97916614;97917741;97917949;97929528;97931108;97936393;97938846;97941471;97941614;97950273;979…
141	11	102371595	102525928	67	147835	102371595;102378034;102378065;102378193;102378298;102379805;102382081;102384166;102387878;102387929;102387959;102389588;102389904;102391425;102392380;102392656;102393055;102393547;102394291;102397596;102398436;102398593;102400336;102400624;102400768;102401083;102419067;102419691;102419819;102421444;102422443;102423694;102426332;102426475;102429324;102430166;102431133;102432049;102433123;102434901…
149	11	99619509	100030785	164	138382	99619509;99629128;99629248;99634674;99634849;99635616;99637969;99641100;99642042;99642569;99643381;99646425;99647850;99648872;99649103;99649349;99663193;99664718;99665247;99666146;99667557;99673182;99673614;99674531;99674542;99675211;99675413;99677136;99677678;99683010;99683569;99684531;99687043;99687518;99692423;99692713;99693817;99703028;99703452;99705256;99707407;99726964;99727125;99730255;997…
931	2	173288337	173415706	47	140129	173288337;173288817;173289239;173290287;173290562;173293562;173293584;173295405;173296252;173297783;173300939;173302006;173308194;173311553;173313453;173313965;173317826;173318179;173318244;173319112;173319930;173321413;173327823;173331076;173334716;173342416;173344128;173344680;173352157;173352824;173368358;173373831;173374424;173375391;173377277;173377302;173379230;173382986;173392942;173393605…
937	2	106375875	106537667	79	129806	106375875;106376194;106378067;106379470;106379618;106380640;106380850;106384656;106385343;106386114;106387947;106394411;106394881;106397912;106398247;106398575;106399404;106399505;106400058;106400295;106400611;106400717;106400991;106401106;106401763;106403465;106403710;106404337;106404898;106406019;106406251;106406852;106407894;106408273;106409538;106409694;106409722;106409987;106410112;106410359…
936	2	177095005	177309641	76	131729	177095005;177096677;177097310;177098375;177100026;177100410;177104706;177109691;177110423;177110451;177124276;177130549;177131531;177134291;177134913;177135641;177139772;177142216;177146691;177154228;177161042;177162299;177169566;177170427;177171537;177172295;177173780;177175274;177175706;177180856;177181062;177183461;177190023;177192368;177193087;177196488;177197059;177197083;177198492;177199123…
934	2	172271447	172449291	83	137204	172271447;172271502;172272628;172273780;172274272;172275023;172276145;172278763;172279026;172281558;172282461;172288645;172296353;172296853;172296911;172296953;172299802;172300409;172302378;172303215;172303277;172311900;172313249;172313307;172315590;172318160;172318312;172318976;172321821;172327353;172331920;172334787;172336801;172338002;172338658;172342249;172359135;172360355;172374017;172374108…
828	21	43542386	43668362	65	114856	43542386;43544184;43546509;43548851;43553681;43553736;43553771;43553849;43553960;43554098;43554171;43554250;43555151;43557157;43564228;43570199;43572458;43574055;43578222;43593891;43594834;43595643;43596499;43596557;43597622;43597972;43598043;43598347;43598755;43598999;43599103;43599172;43599252;43599279;43599745;43600149;43600164;43600587;43600943;43604470;43604533;43605017;43605091;43605753;436…
825	21	37344647	37557870	91	133023	37344647;37345080;37345637;37345664;37346157;37346800;37346845;37348386;37350173;37350319;37351306;37351459;37351802;37352953;37361832;37363385;37364473;37368100;37369628;37370442;37371181;37375656;37379974;37380878;37382478;37386288;37386533;37388830;37393426;37397600;37406063;37406342;37410477;37410633;37414256;37415603;37417185;37422226;37427991;37428021;37431964;37432673;37433765;37438381;374…
824	21	36902746	37053784	97	137089	36902746;36905318;36908369;36908682;36909397;36910279;36910335;36910523;36910568;36910754;36911201;36911397;36912210;36912839;36913304;36913907;36915992;36916005;36916623;36916902;36918085;36918960;36919005;36919218;36920133;36920239;36920434;36920853;36921396;36921488;36921676;36921907;36922050;36922142;36923081;36923124;36923879;36926444;36933897;36936784;36938900;36943898;36945611;36946700;369…
826	21	43733628	44190378	179	132338	43733628;43735183;43735844;43738859;43740165;43744809;43746022;43747917;43748823;43749623;43752725;43753584;43754515;43754699;43755728;43756430;43756505;43758762;43760043;43760839;43763899;43765456;43767776;43774112;43774637;43775213;43779317;43782526;43782613;43783660;43784414;43786633;43788572;43793933;43801102;43801520;43803363;43803576;43803934;43803950;43804876;43806557;43809970;43811011;438…
823	21	32863762	33207694	93	137388	32863762;32865553;32866412;32871154;32884758;32890896;32891088;32893623;32904425;32904698;32909236;32911244;32919790;32925898;32938032;32938221;32940306;32941025;32954299;32957021;32964911;32966623;32966663;32968457;32970203;32977152;32979363;32979628;32981927;32982379;32988217;32989132;33003216;33008600;33009242;33015897;33016490;33016865;33027600;33028368;33035995;33038865;33044408;33047548;330…
1536	8	21908440	22219322	85	188646	21908440;21912925;21913824;21916072;21917300;21917715;21927549;21928771;21934686;21937825;21937847;21944541;21944719;21944995;21945061;21949097;21949817;21950908;21961405;21967407;21969665;21975345;21975927;21977744;21982114;21995146;21996411;21996453;22004340;22004725;22009282;22024743;22026147;22028254;22029778;22041309;22041870;22046748;22047973;22048127;22048971;22049341;22050584;22051281;220…
1482	7	13990919	14174720	74	129455	13990919;13996947;14002057;14002806;14003443;14006017;14006255;14012886;14014360;14034112;14035304;14035950;14038275;14039904;14039919;14043697;14044010;14047296;14049516;14050195;14057894;14059421;14059487;14062500;14064555;14068933;14069299;14076537;14079111;14081958;14082247;14088598;14089991;14090868;14091862;14093287;14098672;14099155;14100880;14105996;14106242;14108312;14111674;14114611;141…
1481	7	25409431	25667554	76	130751	25409431;25420102;25425325;25436917;25448936;25452194;25452603;25452819;25453767;25453817;25454202;25454529;25454796;25461323;25464151;25466516;25467782;25468682;25468916;25473826;25473913;25477976;25481777;25482951;25483161;25485356;25489823;25494452;25502403;25504198;25508765;25509486;25510920;25511236;25516694;25523054;25534616;25537673;25538672;25542747;25547257;25550560;25550859;25555260;255…
1485	7	80649746	80831769	86	125861	80649746;80650505;80652473;80652604;80652737;80655089;80655773;80655822;80656084;80657817;80658541;80659643;80660678;80661363;80665969;80666209;80666223;80666635;80670395;80670584;80670786;80684924;80686196;80687757;80694034;80694417;80694448;80695981;80698124;80700583;80703364;80705741;80708255;80723373;80726391;80727151;80728283;80731137;80732672;80735294;80737212;80737843;80739870;80741242;807…
1488	7	53239438	53610116	153	124726	53239438;53241921;53242513;53243734;53245206;53245407;53248541;53250392;53251200;53252525;53253372;53253425;53253882;53253925;53254152;53257309;53259755;53262866;53268647;53269673;53269990;53270035;53270870;53275010;53278030;53278046;53281889;53283231;53283997;53293965;53297884;53297960;53299090;53303174;53303644;53309538;53323232;53326038;53327249;53333546;53335338;53344532;53345973;53346116;533…
795	20	58786901	58967842	74	128428	58786901;58794316;58795257;58796055;58802684;58814671;58818564;58820603;58822396;58824042;58827034;58827747;58829173;58829276;58831701;58833722;58835526;58852520;58853877;58858132;58860508;58866575;58871071;58871111;58871195;58871337;58872441;58872986;58877779;58878977;58880481;58882525;58886956;58887538;58889343;58891779;58906976;58907047;58908318;58908343;58913942;58919157;58920092;58920141;589…
792	20	49084417	49236475	52	143783	49084417;49087712;49089945;49091287;49093376;49096493;49098568;49099558;49102514;49108879;49109807;49110202;49110663;49110827;49116932;49118519;49120883;49132139;49133280;49134091;49135707;49143114;49148007;49150913;49151999;49153808;49161754;49166548;49168051;49173006;49180306;49188476;49191415;49191939;49203895;49208718;49209846;49211747;49213986;49214055;49214188;49217503;49224572;49225610;492…
790	20	24061845	24297111	110	157656	24061845;24062669;24063330;24063382;24063651;24063670;24063999;24065207;24068249;24068746;24068770;24069114;24070539;24072684;24073926;24074147;24077725;24085782;24086516;24089274;24091455;24091609;24092488;24092639;24093591;24094416;24094784;24094917;24097086;24100680;24101876;24107403;24107791;24110870;24112842;24114148;24117887;24119790;24120816;24124374;24125486;24128797;24129712;24131900;241…
799	20	56080967	56158848	36	120889	56080967;56085461;56085633;56088039;56088561;56095815;56096382;56097160;56097392;56097916;56098400;56103046;56103136;56103305;56104309;56110157;56113998;56117135;56118051;56121999;56125389;56126590;56130895;56131933;56132328;56136408;56139365;56143662;56144102;56146496;56147351;56151133;56151484;56152650;56154861;56158848
1137	4	96507809	96732191	160	151066	96507809;96508502;96509514;96509708;96511595;96515800;96516544;96519742;96521733;96521891;96522822;96525679;96528236;96529081;96531108;96537093;96537261;96537823;96539928;96542295;96542339;96548141;96548162;96551703;96553252;96555823;96563306;96567724;96569659;96569776;96570022;96570364;96570381;96571272;96571457;96571531;96571969;96572056;96573160;96573343;96573396;96574130;96574974;96575161;965…
1136	4	181783790	181893794	70	152737	181783790;181788631;181791101;181792812;181796673;181804199;181804235;181806282;181806571;181811476;181815326;181815623;181815837;181818097;181818292;181818520;181818911;181820277;181821385;181822790;181823821;181825056;181825227;181825940;181828083;181832063;181845156;181845340;181846474;181846890;181847022;181847698;181848432;181849159;181849396;181849453;181849870;181850027;181850125;181850546…
1134	4	130151927	130447232	118	153133	130151927;130159911;130161321;130165693;130167521;130169568;130171763;130176551;130177800;130178330;130186052;130187744;130189145;130189765;130189880;130196110;130196285;130210443;130210808;130210954;130214768;130220207;130222525;130236496;130236650;130241296;130243970;130245549;130248564;130256317;130260147;130265003;130269904;130270608;130271025;130271181;130271816;130271937;130272851;130277583…
1009	3	190033513	190218903	92	184042	190033513;190039888;190042378;190042657;190043951;190044046;190048082;190051880;190054335;190055840;190057409;190057980;190058381;190058407;190059042;190059185;190059591;190059985;190061447;190061796;190062121;190062685;190062697;190062726;190062819;190063368;190067454;190067537;190067551;190067882;190068036;190068469;190071721;190071807;190072279;190072535;190073560;190073827;190074599;190074790…
1008	3	5856917	6082275	80	185106	5856917;5861205;5861681;5863786;5864798;5866407;5867227;5872053;5876424;5876448;5878521;5882295;5882386;5883768;5888848;5891590;5892059;5894958;5897381;5897419;5900429;5901724;5902184;5902298;5905505;5912773;5917923;5923588;5924840;5927368;5928807;5931782;5933848;5936056;5936099;5945521;5948411;5955821;5958414;5960850;5964642;5965221;5968027;5975547;5977065;5977315;5980487;5980853;5987269;5987906…
1007	3	135621414	136675412	588	190601	135621414;135626457;135628361;135635381;135638860;135649831;135650281;135650972;135651048;135651355;135651688;135653394;135653616;135653927;135654339;135654934;135655198;135655334;135655628;135655829;135655946;135656311;135656616;135657368;135658840;135658912;135659871;135660017;135660452;135660474;135661555;135663224;135663259;135663713;135665622;135665887;135666445;135666912;135667431;135667609…
1005	3	52214839	52848533	241	193025	52214839;52215937;52218386;52221914;52222440;52222729;52224589;52225766;52227274;52227289;52228605;52233295;52236800;52238356;52241714;52241801;52242103;52242651;52243246;52243406;52244085;52249068;52251632;52256805;52257183;52258770;52263622;52266806;52268743;52270178;52271164;52271779;52272197;52274129;52281969;52285685;52286042;52286657;52294746;52295868;52301334;52304427;52315833;52316247;523…
1000	3	66270544	66541813	99	207909	66270544;66271956;66273969;66274006;66275050;66275105;66275121;66275425;66275954;66276700;66277673;66280175;66280505;66280552;66281656;66282407;66282629;66283275;66284506;66287492;66287925;66288569;66291793;66293043;66294578;66294967;66296331;66299110;66299211;66302771;66314003;66314138;66315797;66318934;66321065;66323596;66323878;66324161;66330151;66330908;66331747;66334583;66338447;66341388;663…
620	19	31919417	32036226	47	127736	31919417;31931269;31943179;31945566;31948941;31964841;31968098;31972549;31972876;31978559;31981479;31983007;31984256;31986643;31993261;31995051;31995557;31995955;31996299;31996795;31997592;31999624;32002483;32002955;32003733;32003960;32004783;32005032;32007292;32008764;32010792;32011877;32012996;32016529;32018722;32020587;32020614;32020999;32021773;32021829;32024088;32027905;32028531;32031384;320…
624	19	38715498	38900947	47	122147	38715498;38722592;38733755;38744845;38746071;38749038;38754643;38756602;38762640;38768206;38768562;38774080;38775843;38776676;38778167;38780308;38782056;38793136;38798408;38798473;38798679;38809519;38810063;38811597;38811688;38813163;38817232;38818733;38824929;38827811;38829331;38833634;38834123;38846713;38849371;38850238;38850420;38850815;38856586;38856805;38858505;38865586;38866553;38867560;388…
629	19	50939393	51068519	40	107825	50939393;50952400;50955277;50960529;50962131;50973129;50978724;50985867;50986341;50988562;50993691;50993983;50994307;50998516;50998581;50998802;50998836;50999497;50999595;50999608;50999643;51003571;51007722;51009742;51010653;51012619;51013711;51013807;51014600;51018233;51025916;51027650;51028183;51035305;51043281;51051059;51064526;51064609;51068178;51068519
1535	8	69863099	70205499	117	189436	69863099;69869293;69872620;69873636;69878223;69880963;69881691;69886143;69887724;69888532;69889391;69889547;69889645;69890040;69890074;69890187;69890234;69890497;69893956;69895826;69896006;69900592;69900724;69903815;69916816;69934282;69935616;69935741;69941910;69945678;69946578;69947908;69957117;69963347;69968143;69968325;69974170;69975300;69978818;69990695;69991399;69992814;69994213;69995660;699…
2	10	66576800	68393544	588	404159	66576800;66577080;66580178;66581225;66581667;66583015;66601316;66602222;66602760;66607503;66609385;66614525;66623534;66625193;66636623;66637953;66639784;66642076;66646034;66646272;66646328;66646560;66646816;66647008;66647027;66647129;66647482;66648224;66648322;66648363;66648661;66648720;66648752;66648785;66649016;66649454;66649484;66649763;66650212;66650275;66650508;66650763;66651183;66651839;666…
11	10	44070943	44817683	355	276349	44070943;44076737;44079147;44082168;44082972;44085947;44089490;44092393;44097016;44106291;44117549;44118532;44120982;44124810;44128542;44129260;44132099;44132505;44138523;44138975;44140333;44141952;44142382;44147001;44147275;44147688;44150112;44150558;44153724;44158530;44158852;44160088;44161066;44161244;44163192;44164520;44166755;44172396;44176295;44177939;44181072;44182337;44186524;44189550;441…
10	10	752876	831004	95	288518	752876;752898;753022;753095;753200;753298;754487;754731;755026;755262;755932;756109;756245;756358;756373;756455;756673;756703;756715;756757;756966;757100;757222;757477;757571;758991;759497;759559;759640;760510;760952;762288;763365;763617;764545;764683;764786;765008;765072;765117;765162;765313;765675;765739;765769;765800;765852;765897;765968;766283;766598;766862;768367;770979;771870;778770;787740;…
15	10	90568010	90736909	80	257436	90568010;90569427;90570817;90573309;90573491;90573587;90574742;90575957;90578438;90579323;90580292;90582886;90585248;90586081;90586417;90586729;90586930;90588789;90589241;90590099;90590724;90591125;90591562;90591577;90592855;90595408;90597665;90598182;90599996;90606201;90614790;90615587;90616806;90618468;90619164;90622282;90625271;90627853;90630003;90630920;90631937;90640578;90640668;90640827;906…
17	10	126059489	126294965	89	244718	126059489;126059884;126061203;126062058;126063075;126064162;126065635;126067965;126079616;126080504;126081156;126082466;126082849;126083850;126083897;126085976;126088673;126090908;126092140;126095615;126096515;126102896;126102987;126105356;126107671;126108403;126109296;126111724;126121946;126124882;126131704;126135795;126136803;126140950;126157636;126158358;126161628;126161839;126162086;126163343…
18	10	13781759	13822953	49	233653	13781759;13781869;13784349;13789946;13789976;13790023;13790210;13791215;13791562;13792441;13792651;13792709;13793416;13793860;13793907;13794834;13794855;13794926;13795019;13796633;13797378;13797853;13798911;13800936;13802027;13804830;13804906;13805546;13805621;13805849;13808071;13808379;13809387;13810318;13810357;13811970;13813051;13813105;13813453;13814581;13815498;13817089;13818974;13819484;138…
1534	8	32137271	32399378	110	192346	32137271;32143306;32147517;32149956;32159488;32161592;32166816;32168607;32175181;32176848;32178274;32183122;32191308;32196911;32208121;32209331;32211991;32213431;32214715;32214785;32214812;32214835;32214859;32215090;32215103;32215220;32215393;32215643;32216283;32217590;32217654;32217944;32218182;32218309;32218541;32218560;32219018;32219152;32219490;32219550;32219572;32223539;32223901;32225692;322…
205	12	61274122	61724255	192	210015	61274122;61289054;61290069;61295146;61296992;61300052;61300733;61301423;61313711;61317064;61324549;61331319;61335009;61338631;61339043;61340564;61345051;61348605;61350668;61352890;61353817;61354309;61355913;61356221;61356571;61358972;61365959;61366420;61369102;61370118;61371153;61371813;61371962;61374883;61379084;61379346;61380434;61382228;61383246;61383289;61383769;61384690;61384715;61384909;613…
204	12	77110819	77387827	191	215773	77110819;77112647;77113900;77117692;77128294;77129417;77130016;77132508;77135808;77137112;77137627;77137937;77141301;77143666;77144420;77144953;77145056;77148112;77148422;77150089;77151314;77151336;77152091;77152232;77152360;77153508;77155247;77156443;77158841;77159147;77159952;77162447;77162834;77163040;77163856;77165301;77165609;77165823;77165865;77166158;77166938;77167094;77167838;77168182;771…
207	12	96632840	96824763	70	197183	96632840;96637222;96638781;96639569;96640417;96641991;96642679;96644353;96645041;96648385;96654328;96654648;96658617;96659870;96673016;96679212;96680623;96685925;96687268;96687622;96689289;96689781;96689883;96695104;96695983;96698811;96708035;96708301;96708764;96715874;96719201;96719350;96720802;96724973;96735163;96736759;96738717;96744376;96744741;96745765;96748551;96754049;96757706;96757811;967…
206	12	57865558	58280751	124	200472	57865558;57871951;57879986;57883741;57884116;57892500;57898120;57900490;57905612;57906282;57906592;57909284;57913740;57913963;57914264;57915634;57917602;57922929;57926628;57929507;57930170;57935691;57945036;57945256;57946436;57948552;57963828;57972213;57976313;57989034;57991657;57993330;57998311;58000144;58003741;58003844;58007149;58011717;58012007;58012055;58012138;58013915;58014396;58015819;580…
1577	8	131011520	131488343	137	106682	131011520;131013019;131014233;131016103;131018286;131018442;131019619;131020798;131024253;131034168;131036353;131041020;131043310;131044680;131044837;131045893;131046123;131050613;131054622;131066848;131066928;131078287;131084211;131096799;131097157;131098956;131099595;131105046;131105414;131109935;131110092;131115354;131118658;131123811;131135657;131136551;131137025;131145239;131159933;131163760…
1576	8	66187918	66384822	102	108756	66187918;66191708;66193316;66195047;66199045;66201519;66204650;66209436;66210699;66212426;66213958;66222330;66224929;66224987;66226308;66234944;66238289;66240455;66245377;66253170;66260370;66264710;66265162;66266728;66267445;66268011;66268445;66268843;66275290;66276707;66278761;66279227;66282366;66287704;66289112;66292500;66293171;66301775;66301949;66302722;66302869;66308927;66311032;66316530;663…
929	2	235264976	235348562	42	141704	235264976;235265444;235265985;235266310;235267208;235268122;235273033;235273918;235279555;235282246;235282366;235283180;235283315;235283683;235284226;235284268;235285027;235285277;235286202;235286502;235286716;235287102;235289912;235290104;235292620;235293985;235297201;235297567;235300404;235302999;235312307;235315059;235318356;235334566;235336220;235338926;235340043;235343733;235345380;235347458…
920	2	236289377	236352237	41	150698	236289377;236294145;236298701;236298954;236299461;236299716;236305501;236315089;236315268;236315281;236316654;236317086;236318922;236319533;236319547;236319938;236320049;236320342;236320489;236320631;236320770;236321007;236321201;236321226;236321340;236321386;236321926;236322068;236322438;236322784;236326533;236326963;236329501;236330669;236333260;236333956;236334483;236348372;236348902;236352072…
921	2	179570122	180138313	166	148989	179570122;179580434;179581835;179585963;179589769;179589919;179592161;179592735;179603225;179604160;179604366;179604742;179605705;179607487;179609005;179609978;179610009;179611711;179617370;179622805;179631851;179633090;179634936;179635850;179636257;179636668;179637861;179641975;179644160;179645285;179645731;179660954;179666246;179666425;179674471;179676118;179678889;179679810;179686840;179687500…
922	2	82485327	83495814	353	147572	82485327;82487387;82487460;82487693;82487876;82487936;82488087;82488141;82488345;82490079;82490168;82490280;82490741;82492413;82493104;82493229;82494566;82494739;82496618;82498007;82498080;82499124;82501192;82503390;82504300;82518471;82519510;82520456;82526821;82527843;82528891;82537628;82539272;82550916;82552821;82553725;82555004;82560717;82565010;82573548;82580095;82583293;82589395;82597156;825…
923	2	162124590	162744546	269	146515	162124590;162127034;162133525;162143283;162143592;162161388;162174837;162179197;162182954;162185558;162193238;162205061;162215563;162218614;162226315;162230834;162232085;162240407;162245832;162245871;162247399;162249206;162250910;162251856;162252421;162252619;162252899;162253435;162257548;162258195;162265189;162269775;162269866;162270728;162273891;162278233;162283469;162286314;162289156;162295623…
924	2	167139021	167350180	69	144811	167139021;167143200;167146998;167147041;167155131;167162683;167166083;167172336;167180703;167188222;167188545;167189303;167196466;167197414;167198295;167198680;167200980;167202258;167204415;167208610;167210035;167213683;167213848;167224050;167224079;167233776;167239558;167250945;167258910;167261159;167263533;167264355;167265446;167265494;167265706;167265988;167266344;167266515;167266928;167267069…
927	2	169183480	169514500	165	142503	169183480;169187267;169188775;169189086;169191759;169195679;169198236;169198285;169203693;169208680;169210824;169211341;169211818;169212418;169212863;169214257;169220880;169221824;169224754;169227625;169229629;169229827;169230839;169237431;169238057;169238079;169239686;169240666;169244002;169245661;169246562;169250233;169251378;169252694;169254630;169259651;169262272;169265449;169271548;169278529…
832	22	49204866	50343144	457	718855	49204866;49208132;49210123;49211058;49214887;49217141;49217253;49219178;49219811;49219910;49219989;49221482;49221732;49223683;49223910;49224013;49227384;49231842;49234262;49234360;49238637;49240361;49248777;49254551;49260069;49260922;49261062;49261576;49265199;49268243;49268922;49275003;49278968;49280258;49282783;49287421;49287535;49293781;49295483;49295787;49295942;49301511;49306212;49309948;493…
833	22	33123589	33505155	145	239555	33123589;33124514;33132896;33133708;33133903;33133936;33134140;33134751;33135579;33136262;33137937;33138463;33139169;33156903;33159366;33160176;33160513;33166622;33169950;33173588;33179013;33194294;33196512;33203759;33207005;33211054;33213494;33213797;33223408;33229506;33229902;33230983;33231815;33235303;33241368;33241843;33242604;33248647;33249611;33249888;33260386;33263607;33263815;33266909;332…
836	22	33843450	33929122	74	178952	33843450;33845372;33847385;33847422;33847857;33860656;33863141;33867748;33867797;33868301;33868913;33868956;33870452;33870541;33871186;33872045;33872839;33873059;33873362;33873876;33874038;33874961;33875299;33876090;33876210;33876272;33876535;33876801;33879185;33879745;33880217;33880620;33881724;33881816;33884894;33885936;33886428;33886962;33887430;33887491;33887609;33887837;33887917;33888713;338…
834	22	30792168	31230699	149	193935	30792168;30793817;30794350;30795742;30798113;30801633;30806425;30812973;30818913;30823013;30823104;30823643;30827325;30827567;30830919;30835369;30839213;30840786;30841208;30842189;30843396;30843509;30846102;30852711;30855901;30855925;30859127;30862028;30864655;30864720;30866053;30866736;30873150;30879738;30880871;30880890;30881817;30885992;30886645;30888206;30888234;30888329;30888492;30893887;309…
838	22	34382614	34847727	138	169220	34382614;34392971;34401970;34402185;34405242;34415179;34417069;34418421;34420959;34421041;34422430;34425705;34426135;34427344;34434098;34435516;34436761;34451306;34452963;34460882;34464813;34466361;34471719;34472051;34474261;34474283;34488196;34488667;34494140;34501749;34502495;34502559;34502803;34511321;34511961;34513821;34514948;34516260;34521535;34522558;34527315;34527328;34527992;34529557;345…
839	22	26214676	26311502	47	158006	26214676;26214942;26215305;26215568;26216187;26221203;26223822;26224669;26227817;26233500;26233672;26239489;26239698;26241197;26245736;26245936;26246809;26248998;26249092;26249616;26252071;26252923;26253622;26253912;26253960;26255904;26257024;26257535;26257737;26259619;26263696;26270632;26283255;26283320;26290726;26290762;26290851;26291452;26292990;26294731;26295229;26295263;26302083;26305856;263…
1532	8	102560664	102746319	69	196501	102560664;102561256;102561323;102566260;102566846;102586173;102587651;102588156;102590007;102595182;102595807;102598766;102599407;102605267;102606925;102607574;102607739;102613096;102616591;102616787;102616878;102620617;102621715;102623182;102623334;102625361;102634704;102637779;102640257;102645185;102647360;102651890;102660207;102666342;102671448;102674677;102674713;102676508;102678344;102679130…
784	20	40567099	40743745	89	237924	40567099;40567159;40570082;40571132;40571712;40572214;40575237;40575871;40579183;40579396;40579551;40579981;40581066;40583164;40584032;40584448;40588661;40590982;40595884;40597574;40601077;40602596;40604255;40606658;40607027;40607094;40607135;40607178;40609189;40610475;40611260;40613720;40615352;40615447;40615883;40615931;40616531;40620253;40622401;40622909;40623986;40624117;40628646;40629488;406…
785	20	15808487	16421353	209	198945	15808487;15808549;15816520;15816772;15817563;15820570;15822786;15829568;15829764;15830144;15832464;15833605;15834141;15837346;15841177;15845515;15847929;15848436;15851413;15854901;15857064;15858566;15859834;15860092;15864030;15864536;15872019;15873799;15877027;15878616;15886612;15894590;15898322;15901883;15904979;15906317;15907093;15911630;15916596;15920133;15926817;15927732;15941950;15948037;159…
780	20	41084721	41112555	110	272350	41084721;41085040;41086553;41086590;41086607;41086841;41087151;41087589;41087963;41088636;41089066;41089180;41089649;41089800;41089922;41089954;41090169;41090359;41090785;41091265;41091874;41092239;41092486;41092508;41092599;41092930;41092977;41093369;41094016;41094442;41094791;41095001;41095179;41096016;41096075;41096168;41096760;41096917;41097004;41097174;41097191;41097381;41097586;41098591;410…
781	20	14538546	14985861	140	261611	14538546;14539450;14542687;14544595;14546237;14546951;14549065;14560149;14561724;14566486;14579967;14583355;14585747;14595794;14595861;14596677;14598329;14603709;14612593;14614682;14616354;14619978;14622524;14624786;14625558;14631740;14633561;14634983;14643053;14643952;14651465;14652403;14653101;14660301;14662950;14663820;14671712;14677564;14686465;14687059;14688781;14689649;14693777;14694073;146…
782	20	39008011	39427135	169	248718	39008011;39023699;39024691;39033758;39034388;39034823;39034959;39035819;39037151;39037451;39037964;39038590;39038813;39040753;39041152;39041279;39045487;39045734;39046906;39047111;39048185;39048538;39049327;39049646;39050793;39052646;39052703;39054820;39055032;39055693;39056095;39074242;39078185;39080653;39089365;39091287;39095282;39096696;39096742;39103202;39103650;39104709;39105631;39107318;391…
783	20	3442729	3800410	115	243755	3442729;3446033;3447640;3450791;3456866;3462032;3462235;3471898;3472033;3474584;3475997;3476940;3478347;3480667;3482099;3493153;3494730;3500877;3504485;3505409;3508043;3508381;3509171;3509604;3510553;3512190;3512381;3512696;3514355;3514746;3517040;3521344;3530895;3530911;3533605;3539928;3540715;3541382;3543542;3546143;3546691;3549650;3549713;3551637;3556956;3560191;3561624;3561892;3566672;3568794…
788	20	41751225	41820166	45	173141	41751225;41752221;41752414;41752998;41755597;41762647;41768078;41772771;41777452;41785446;41786683;41794109;41795729;41795936;41797123;41802728;41802770;41803685;41806023;41807024;41807046;41807061;41807220;41807685;41807903;41808844;41808882;41809328;41809395;41809626;41809653;41809703;41810173;41810600;41810790;41812423;41812474;41815264;41815524;41815660;41815704;41815826;41816117;41819634;418…
789	20	13326093	13687072	141	161607	13326093;13328801;13330897;13332305;13333335;13335766;13338790;13341096;13341379;13341392;13341928;13341939;13342157;13342559;13342597;13345788;13347736;13352701;13359590;13364059;13364884;13367535;13367621;13369342;13370707;13371524;13373036;13375614;13376209;13378423;13380439;13382193;13382252;13382631;13388296;13390748;13391683;13391861;13394199;13394477;13394555;13395898;13401060;13403072;134…
65	10	43458888	43580041	70	130797	43458888;43465077;43466182;43466969;43467006;43467103;43469492;43470884;43473019;43474111;43475699;43475719;43476392;43477111;43478876;43479935;43480498;43481076;43481155;43481745;43484745;43484930;43489320;43492207;43496401;43498285;43499332;43499709;43500207;43503351;43505162;43505688;43511037;43511674;43512378;43513041;43513950;43514457;43516848;43517576;43517832;43518344;43522808;43523526;435…
67	10	114035772	114195682	48	129651	114035772;114039844;114053154;114055779;114057332;114057530;114057583;114057680;114059393;114060500;114061751;114062359;114065697;114068259;114083403;114086461;114087412;114094184;114096972;114099788;114105081;114105672;114106373;114106757;114109186;114117430;114119852;114123008;114123027;114128242;114134213;114134316;114135055;114136196;114141822;114144466;114144952;114152791;114153550;114159737…
68	10	6734411	7043252	112	124123	6734411;6735854;6737505;6742893;6743328;6743726;6747937;6749638;6752124;6755304;6756830;6762403;6762683;6768337;6768836;6769297;6776179;6784704;6784934;6791034;6794969;6795454;6805486;6806370;6807730;6809952;6813662;6821947;6823182;6825499;6825915;6830962;6834150;6836687;6842973;6848278;6850891;6852077;6852441;6854785;6864177;6866734;6867637;6872627;6883850;6899176;6900094;6900179;6903383;6903690…
1580	8	118468283	118609165	54	104969	118468283;118469279;118472007;118475417;118477307;118480882;118482248;118482594;118482770;118488297;118490089;118492480;118493842;118495273;118495902;118498086;118499419;118501147;118503442;118506012;118507810;118510733;118511064;118512746;118515393;118515733;118515804;118518156;118519452;118520765;118521937;118526181;118531404;118541863;118543670;118551603;118554917;118556912;118557645;118559975…
404	14	86304975	86633819	143	117704	86304975;86317611;86318113;86318178;86318713;86318994;86319857;86322930;86326582;86327130;86327926;86329152;86330153;86330309;86330736;86331878;86332425;86332697;86332825;86333295;86333324;86335311;86335358;86337145;86340156;86341666;86344422;86345872;86359516;86360892;86363800;86371715;86372502;86379639;86379672;86382067;86384431;86390472;86392456;86398601;86400634;86403244;86408178;86408550;864…
509	16	88934446	89038759	42	124404	88934446;88934873;88935826;88937921;88941875;88945149;88945380;88945936;88947013;88950518;88952069;88952670;88954282;88954296;88957210;88957933;88962943;88968144;88973054;88974070;88976840;88977855;88982918;88987041;88988953;88991640;88992488;88995162;89000427;89002425;89004285;89006069;89006510;89012318;89015058;89015697;89027371;89029035;89029410;89032120;89032384;89038759
1030	3	126686103	127037477	113	147323	126686103;126687698;126687855;126688014;126688846;126690930;126691720;126696235;126703234;126704698;126706525;126708899;126708992;126715322;126715530;126716420;126717720;126720150;126728348;126742580;126746097;126747015;126749585;126749712;126754653;126755414;126762362;126769401;126772887;126773907;126777215;126781780;126799516;126806057;126807315;126807750;126809407;126809662;126810499;126811455…
503	16	7105939	7162014	64	130504	7105939;7113483;7114563;7115115;7115530;7116382;7116491;7116614;7118453;7119531;7122801;7124554;7124859;7129535;7130250;7132079;7132666;7132682;7132789;7132838;7132907;7132919;7133062;7133197;7133338;7133383;7133520;7133733;7133772;7133801;7133821;7134064;7134379;7134426;7134543;7134914;7134999;7135369;7135528;7135748;7135989;7136080;7136240;7139075;7139242;7142306;7142477;7142568;7142596;7143654…
637	1	37609580	37815147	131	359237	37609580;37611534;37611750;37612249;37612620;37612765;37613140;37614570;37617175;37618249;37618812;37620575;37622092;37622503;37627280;37628004;37628178;37629279;37630329;37630493;37632889;37635504;37635537;37638733;37639441;37640551;37649038;37650472;37655316;37658242;37658486;37658974;37659133;37660024;37660134;37660843;37660953;37661499;37661632;37662419;37666213;37679389;37683329;37690656;376…
638	1	2903159	3456483	205	356502	2903159;2907667;2907980;2908806;2909250;2909737;2909838;2910396;2913235;2913897;2915263;2915334;2915884;2917698;2918907;2921282;2921417;2921860;2925497;2926379;2926555;2927678;2931440;2932560;2940998;2947756;2960608;2962225;2964397;2968983;2973576;2974064;2975119;2994540;2995262;2996556;2998934;2999415;3000465;3005638;3005750;3006131;3006198;3006315;3007675;3015592;3015842;3017158;3019627;3020188…
1376	6	428211	649113	67	133907	428211;432662;433343;433777;434241;435648;435998;436282;437005;437793;438646;441327;444443;444604;445320;451522;452480;452581;453318;453860;453881;454022;454050;455439;458304;461966;463603;465778;467079;468157;470720;483320;496761;497210;497806;503851;510346;512283;512306;524559;524956;525023;529237;534172;535237;535668;540308;542405;544833;552282;556147;565730;571655;582312;587483;591464;591819;…
1103	4	188963108	189257043	93	256461	188963108;188963197;188968350;188968587;188970868;188970902;188972133;188976649;188978074;188979403;188981318;188987282;188988334;188990915;188995106;188998278;188998566;189001354;189008746;189016220;189032770;189036323;189040320;189055670;189062602;189062959;189076550;189076738;189084327;189098744;189101535;189108254;189109877;189111495;189112161;189115813;189116593;189116669;189117163;189122887…
1458	7	158142664	158222749	46	176595	158142664;158143186;158143489;158148321;158150367;158151977;158152016;158159924;158163872;158164395;158165643;158165839;158166750;158167929;158168522;158171160;158171412;158171863;158173008;158176111;158179152;158181109;158182454;158184648;158185187;158187408;158187700;158192171;158195180;158195740;158199561;158202539;158207905;158208572;158212357;158213858;158214638;158215994;158216607;158216763…
1459	7	7682439	7964238	95	174622	7682439;7685808;7689170;7691092;7692767;7693771;7694728;7697335;7698008;7698431;7699568;7704889;7706540;7707340;7711427;7717673;7720017;7721540;7721646;7730990;7737864;7739206;7742919;7743961;7746675;7747779;7752411;7752928;7755591;7759201;7759701;7760481;7771594;7774687;7778527;7785314;7786415;7791807;7797514;7797780;7800642;7801275;7809860;7814161;7814376;7814848;7815602;7819044;7821142;7832347…
1108	4	181149181	181501381	110	233015	181149181;181149988;181152248;181153122;181157371;181158380;181159997;181160545;181165920;181169691;181174902;181174988;181175571;181177076;181180393;181181237;181182340;181185720;181185986;181186708;181190868;181191003;181193387;181195735;181197589;181202106;181203964;181204297;181205765;181212779;181212842;181215384;181218500;181221012;181229959;181237230;181237984;181239927;181252055;181252753…
214	12	24164709	24286520	53	177835	24164709;24166263;24166633;24170743;24173507;24182105;24183349;24186350;24189388;24197748;24197868;24198408;24200121;24201935;24202277;24205248;24205484;24205933;24208032;24210164;24210542;24212717;24213125;24213568;24216524;24216951;24217252;24218838;24219676;24230977;24233332;24238076;24239711;24239835;24240050;24240230;24246131;24249134;24250926;24251344;24252856;24255025;24255755;24259784;242…
215	12	95127506	95930492	212	176338	95127506;95132982;95139652;95140940;95142807;95142939;95143572;95147436;95148832;95153435;95159541;95162360;95163034;95165475;95168164;95186538;95187183;95194432;95194515;95194590;95206803;95209896;95213729;95217284;95217855;95218027;95218582;95218616;95222345;95223454;95224033;95224887;95225142;95226909;95228007;95228631;95230054;95237052;95237725;95238217;95239546;95245848;95251873;95255788;952…
212	12	30559048	30716049	71	187827	30559048;30561887;30568774;30576711;30580295;30582000;30588134;30588491;30588852;30592382;30595760;30597303;30597869;30601816;30603336;30608975;30612565;30614770;30621035;30628079;30628146;30628920;30630795;30632443;30637205;30637478;30641228;30641954;30643296;30644080;30646598;30649048;30651546;30653632;30655109;30655515;30655622;30655706;30655927;30655998;30656062;30656430;30656536;30657107;306…
210	12	125086492	125248077	65	191146	125086492;125099547;125106832;125109334;125109780;125110981;125120538;125122795;125123967;125124143;125126126;125126327;125127676;125127958;125128093;125128224;125128386;125130150;125130227;125143466;125151299;125151349;125153338;125157640;125158157;125158199;125158241;125158364;125160024;125164688;125165154;125175262;125176299;125177358;125177770;125180479;125185471;125193013;125194467;125195074…
218	12	76305432	76414508	37	173044	76305432;76305878;76309129;76314293;76314359;76314532;76315947;76318442;76319924;76323545;76324337;76324357;76326894;76330262;76332039;76342758;76344741;76345731;76351780;76353200;76360894;76366843;76366925;76379294;76381016;76381199;76391110;76392269;76400506;76400886;76401434;76402331;76403396;76407241;76408403;76409761;76414508
219	12	23844161	24056725	73	171829	23844161;23846125;23850375;23850633;23854970;23860616;23862018;23865892;23870769;23871513;23871618;23872336;23873450;23874088;23874274;23882761;23882803;23883209;23887500;23888147;23896919;23899818;23908859;23913716;23918710;23927209;23930341;23930739;23940655;23942034;23945756;23946530;23951066;23961932;23962110;23966499;23974343;23974437;23976189;23976535;23978107;23979422;23979981;23980402;239…
4	10	131824311	132345353	222	380598	131824311;131826112;131830522;131831439;131835571;131836715;131838517;131846688;131847378;131847729;131850760;131861505;131862254;131862853;131863748;131864230;131866534;131869374;131872463;131878465;131878477;131880763;131890334;131891274;131902701;131907361;131907377;131913795;131916373;131918097;131919882;131921761;131925017;131931040;131932631;131935509;131935804;131936610;131937490;131940670…
918	2	67560950	67869772	140	151858	67560950;67561068;67563552;67564966;67568092;67569832;67570448;67573506;67574433;67576674;67580233;67581910;67582145;67584403;67584990;67585103;67585780;67587175;67587887;67588242;67588570;67590628;67593288;67593653;67594695;67597107;67597525;67598584;67606963;67610753;67611527;67611678;67613281;67615604;67616193;67616697;67617925;67617997;67619008;67619709;67620044;67620199;67620781;67626014;676…
915	2	52494233	52649037	98	153571	52494233;52494547;52494668;52496134;52496230;52496363;52496545;52498124;52498304;52498908;52500457;52501716;52503424;52503513;52503868;52505270;52505586;52505605;52505780;52506738;52506972;52506984;52507255;52507368;52508753;52509376;52510908;52511790;52512580;52513335;52516095;52520917;52520960;52521815;52522287;52523249;52523652;52523676;52523884;52525292;52526786;52529946;52532495;52539214;525…
917	2	107781962	108009100	119	152082	107781962;107782858;107784641;107786495;107787471;107789538;107794201;107801402;107806925;107809166;107813966;107817080;107817260;107817313;107817347;107817409;107817535;107817707;107817765;107818657;107818920;107819070;107819192;107819237;107819272;107819517;107819878;107820198;107820608;107820675;107820878;107821071;107821101;107821281;107821484;107821594;107822403;107823024;107823500;107823532…
916	2	70949944	71143711	65	153197	70949944;70950110;70951397;70951734;70952158;70952556;70957107;70959425;70959966;70962530;70966071;70966849;70974727;70977046;70978264;70979944;70983705;70985759;70990597;70991351;71006188;71010049;71011322;71015664;71016836;71022128;71025980;71026061;71028526;71028541;71036073;71039268;71042826;71045120;71046470;71046701;71050178;71063111;71074369;71083633;71084374;71087164;71091772;71093322;710…
911	2	134809740	135013278	71	158323	134809740;134815862;134818640;134820312;134820334;134820347;134821177;134822139;134823275;134823651;134825125;134825153;134828808;134830321;134831719;134833383;134834271;134838176;134842054;134843650;134849035;134854131;134858831;134860062;134865721;134870989;134871541;134872645;134872956;134874191;134881701;134882191;134889417;134891341;134892514;134894249;134897021;134902301;134908440;134912262…
910	2	1782279	2186786	120	160879	1782279;1782971;1784885;1785196;1786319;1787863;1789331;1792152;1803420;1803675;1810422;1820031;1820243;1822506;1824000;1826737;1827864;1829798;1836915;1845306;1851895;1858434;1861899;1862019;1863241;1868001;1869681;1872450;1872767;1875012;1878259;1878508;1882218;1882233;1883893;1885781;1888585;1901520;1903416;1922763;1925657;1930680;1930732;1931190;1931939;1933813;1934268;1934494;1936531;1936677…
913	2	3798267	4206784	149	156697	3798267;3799050;3800095;3804197;3810612;3814045;3814599;3816305;3816733;3817351;3817382;3817487;3818194;3818318;3818350;3818411;3818457;3819042;3819386;3819422;3819474;3820193;3824009;3828293;3828943;3829479;3836924;3838408;3839147;3840816;3841720;3844532;3844745;3844783;3846748;3847332;3847474;3849871;3851651;3853035;3854942;3854959;3854971;3855060;3855147;3855395;3856063;3856213;3862461;3864209…
846	22	17994639	18256129	66	128308	17994639;17996931;17997454;18001109;18005596;18007943;18011745;18018516;18018940;18020856;18021604;18030738;18032259;18038646;18042376;18046630;18050386;18055062;18055605;18065844;18068881;18072623;18075263;18077640;18083167;18088977;18093580;18096378;18098645;18103567;18105033;18111556;18119773;18122994;18129135;18129365;18132928;18135184;18136695;18139510;18145011;18146206;18149037;18153009;181…
844	22	48992423	49115262	53	136446	48992423;48993874;48993933;48993952;48994583;48995618;49008788;49011703;49018233;49024064;49024843;49025257;49026883;49028568;49033207;49033600;49037643;49038803;49041373;49041419;49045663;49046349;49062702;49063182;49065663;49067053;49067525;49067777;49069450;49071731;49071744;49071768;49072541;49073192;49074186;49075848;49076008;49086293;49088916;49091564;49091922;49098688;49104534;49107222;491…
753	1	169453578	169522751	47	111568	169453578;169453703;169457862;169458910;169461481;169466981;169467168;169467610;169467975;169470992;169472304;169472319;169473761;169474120;169478105;169478781;169481731;169482305;169482678;169483561;169486141;169489023;169489203;169489489;169490601;169491331;169492123;169493895;169494384;169494501;169494808;169497614;169502032;169502403;169504321;169507982;169509483;169511878;169512039;169512839…
756	1	237557360	237773247	57	108931	237557360;237558355;237560966;237562296;237562657;237562937;237564694;237568824;237572914;237573806;237576393;237581347;237583349;237599278;237606237;237607382;237607675;237608513;237612976;237620292;237621589;237623674;237627965;237634912;237640146;237642731;237643952;237651078;237653714;237671031;237671056;237675985;237676402;237681269;237683419;237686773;237687711;237687988;237691028;237691446…
754	1	68575211	68742798	56	110853	68575211;68583847;68585238;68585416;68585585;68586152;68588200;68604134;68606115;68613162;68617354;68620224;68633156;68644017;68648182;68653087;68655883;68655920;68660183;68661905;68662276;68664946;68667512;68671354;68676797;68677721;68684010;68701655;68702496;68703460;68703602;68706226;68707122;68708506;68708726;68711771;68712926;68713790;68714121;68720564;68721190;68721609;68724321;68725046;687…
506	16	8090349	8232156	64	126465	8090349;8092928;8096815;8099075;8099686;8102655;8103209;8106344;8107174;8114155;8114166;8120247;8135756;8138314;8140300;8147863;8150198;8150573;8150715;8151805;8155083;8155781;8159962;8163084;8168372;8168729;8173726;8174122;8174762;8175024;8175432;8176777;8177789;8177946;8179362;8182888;8184237;8189283;8189903;8191664;8192486;8194765;8201643;8201913;8202120;8202633;8203140;8208051;8208156;8208166…
1596	9	86990142	87438966	174	259046	86990142;86990282;86990369;86991288;86993224;86993412;86997743;86997942;87003162;87005982;87007306;87009009;87011909;87012436;87018682;87019394;87019709;87022759;87031436;87031827;87032564;87032919;87033335;87047924;87061025;87068280;87068435;87070178;87070208;87073286;87074992;87077080;87079410;87080045;87084854;87085549;87093489;87093812;87095343;87103508;87106372;87106504;87106582;87106862;871…
1033	3	6871682	6999252	78	142889	6871682;6872229;6872563;6873448;6874636;6876727;6876830;6878442;6879565;6880333;6881238;6886464;6887698;6887718;6889031;6889627;6893739;6894337;6895621;6896014;6905708;6908232;6911113;6915044;6917742;6919311;6920312;6922014;6926834;6928180;6928535;6930823;6934204;6934767;6935680;6942701;6942815;6951715;6951797;6953033;6960288;6963195;6963502;6965694;6966755;6968066;6968983;6969526;6969700;6970496…
1025	3	168603402	168926964	108	153344	168603402;168612574;168615451;168617737;168621973;168625000;168640543;168640633;168641767;168648985;168649177;168651759;168654895;168657566;168665473;168666786;168669269;168670632;168671022;168672042;168673043;168673703;168676543;168679614;168679717;168681562;168684186;168685969;168687417;168687708;168697419;168698811;168703033;168704097;168704534;168709978;168711631;168714062;168717285;168718421…
1027	3	4077105	4337833	107	149778	4077105;4079505;4081708;4081783;4082112;4082213;4082410;4082474;4090984;4097084;4098133;4100506;4108278;4111306;4113611;4113639;4114031;4114053;4114894;4115500;4120758;4121038;4122143;4123267;4124428;4125136;4127318;4128779;4135138;4138615;4148775;4151402;4153992;4156810;4164282;4165802;4168547;4169086;4175616;4176680;4176882;4179673;4180434;4186020;4190320;4191387;4194616;4195886;4206185;4206276…
1021	3	143021123	143354691	128	159817	143021123;143021205;143026579;143027790;143028638;143035468;143040210;143041115;143041963;143042850;143043203;143043431;143044931;143045881;143048744;143049362;143051209;143051541;143053013;143053179;143054596;143056856;143058373;143062891;143064368;143065416;143065577;143066327;143067446;143067955;143068304;143068728;143070599;143073313;143075373;143076525;143083343;143083512;143083663;143087533…
1022	3	143979422	144405016	167	158317	143979422;143988533;143993393;143993593;143994735;143996390;144004156;144004376;144009631;144023404;144032104;144034797;144034934;144040474;144041204;144045377;144050061;144055617;144058301;144061613;144066499;144070078;144071224;144071285;144071907;144071925;144072608;144073911;144074215;144077618;144078959;144078989;144079321;144080282;144082506;144082683;144083903;144084102;144085570;144087784…
1029	3	3873141	4072409	82	147562	3873141;3890456;3893119;3895039;3905331;3907856;3908749;3913123;3916492;3916790;3927659;3930319;3931389;3935419;3935455;3935727;3937139;3938332;3938491;3941414;3944770;3946770;3950807;3954633;3955202;3960298;3968392;3972020;3972277;3977869;3982576;3986544;3989579;3989622;3991581;3994643;3996511;3996647;3997009;3997137;3997211;3998408;3998593;3998637;3998660;3998798;3998870;3999116;3999262;3999296…
1034	3	20379347	20847299	105	142771	20379347;20391382;20406783;20407929;20409569;20409633;20412711;20419583;20428079;20428568;20432033;20441050;20454069;20454661;20454969;20456967;20457054;20465084;20466465;20469296;20470313;20470382;20475440;20478203;20485862;20486008;20495023;20495221;20499252;20515315;20517271;20522900;20538433;20544243;20552462;20565304;20568323;20569193;20571461;20581149;20590877;20590925;20591012;20605302;206…
605	19	34214403	34402168	93	291292	34214403;34214729;34214993;34215863;34216766;34220574;34220724;34221100;34222451;34222916;34223195;34224453;34226867;34228093;34228123;34228547;34228992;34229933;34230173;34231373;34232121;34232171;34232912;34236081;34236096;34237046;34238104;34238725;34239723;34240760;34242385;34243440;34245518;34245625;34246023;34246739;34246841;34246878;34246915;34246990;34247454;34247773;34248891;34248942;342…
604	19	46776452	47057509	93	352019	46776452;46780563;46785533;46789746;46790843;46796674;46797524;46802477;46811435;46815154;46815740;46823803;46828719;46829324;46835512;46837788;46840304;46840885;46850315;46854932;46854978;46861437;46868730;46868960;46875393;46882460;46884094;46885932;46887007;46893465;46905215;46906421;46916239;46925938;46927569;46934979;46937924;46939017;46947570;46949545;46950437;46950906;46951805;46953382;469…
606	19	52406263	52633523	100	239203	52406263;52407119;52412664;52423213;52427470;52429706;52429972;52430185;52430204;52433671;52433900;52434513;52434877;52439241;52445716;52447624;52457732;52461484;52467497;52467934;52480168;52480811;52482432;52483343;52484177;52486557;52498747;52510957;52517243;52522033;52525077;52525684;52533044;52534899;52542344;52549782;52552419;52554146;52564039;52573404;52580065;52600012;52600155;52600255;526…
600	18	23809267	24064359	67	106296	23809267;23815665;23824565;23830851;23840470;23843094;23848043;23850334;23863831;23864203;23870500;23877229;23882161;23886148;23890012;23890720;23895746;23899769;23909250;23909889;23920962;23921580;23923479;23941803;23942171;23943130;23944827;23947885;23950065;23959587;23964802;23970677;23971806;23974696;23986208;24002682;24002973;24003121;24008773;24011362;24014161;24017666;24017948;24019790;240…
602	18	46117235	46331010	73	102136	46117235;46131752;46132150;46140543;46145397;46148496;46150339;46152209;46154544;46155018;46156796;46160481;46161142;46162993;46165092;46165867;46167679;46169833;46171173;46172208;46172532;46188062;46190298;46192724;46196971;46200360;46201653;46203708;46203724;46205504;46205614;46206250;46210515;46214302;46218387;46218445;46218916;46221685;46228795;46230851;46231375;46231653;46234097;46234832;462…
609	19	50647168	50809760	48	196891	50647168;50651039;50651275;50652237;50662529;50673929;50682570;50685604;50695532;50695742;50697942;50700318;50707733;50708879;50714410;50714679;50715681;50717901;50718167;50719101;50719408;50720559;50722779;50724714;50730060;50732626;50738097;50746824;50749029;50755766;50756075;50756229;50758872;50761364;50762558;50765453;50768148;50771432;50775779;50781296;50782791;50783168;50792684;50807794;508…
1110	4	36345669	37473742	422	225890	36345669;36348556;36351308;36352451;36352507;36352709;36353144;36353171;36353289;36353308;36353342;36353433;36353621;36353711;36353843;36353916;36354145;36354416;36354473;36369441;36372545;36376426;36377101;36379571;36380674;36380815;36381405;36381852;36389033;36390332;36391500;36392727;36393072;36393687;36394207;36394873;36397841;36399361;36400142;36411073;36411804;36413169;36420874;36420931;364…
1112	4	33223847	33641739	123	212048	33223847;33227382;33227494;33228409;33231934;33241795;33243566;33244431;33245176;33248051;33248801;33250402;33253324;33255194;33255564;33255944;33256042;33259559;33260101;33260785;33260796;33262502;33265464;33269874;33270316;33270682;33272479;33273362;33275350;33282442;33283772;33285238;33288304;33291084;33304052;33306377;33307943;33314521;33314822;33317221;33320242;33333859;33341469;33348537;333…
1115	4	27966505	28873007	278	203052	27966505;27967325;27969497;27971001;27972786;27975486;27976254;27977635;27978747;27978761;27981239;27983647;27983989;27985307;27986177;27986389;27993916;28000523;28001900;28003895;28003922;28007167;28010423;28014617;28015014;28018399;28021367;28021832;28026260;28027176;28030045;28036955;28038098;28038705;28044395;28058167;28063360;28063725;28066782;28071409;28072163;28079150;28079298;28092718;280…
1117	4	163358483	163534071	66	198421	163358483;163373349;163376160;163376689;163384015;163386757;163389224;163392289;163398025;163401080;163409892;163410998;163413222;163418069;163421017;163422672;163423850;163429392;163429413;163433687;163436782;163438390;163439527;163446499;163446534;163450123;163451821;163451903;163451927;163452323;163452343;163452588;163452859;163452945;163452995;163453064;163453075;163453172;163453494;163453518…
1119	4	4842242	4936161	56	195735	4842242;4854465;4858220;4859026;4864230;4864299;4866245;4868254;4870137;4870728;4875580;4875829;4876557;4885629;4887311;4887865;4889014;4889641;4890838;4893171;4893962;4894713;4897115;4897180;4897804;4900003;4901671;4902276;4903582;4903673;4905391;4907320;4912983;4915425;4916754;4918751;4918939;4920267;4921638;4922215;4924404;4926971;4928588;4929486;4930506;4930623;4931641;4932244;4932864;4934142…
1449	7	14389125	14707274	114	217374	14389125;14392155;14392375;14396987;14406566;14414260;14423717;14425332;14428393;14428481;14428646;14431558;14431800;14433134;14436339;14436406;14439688;14446199;14450331;14461281;14469628;14469760;14471176;14472931;14473474;14476928;14480105;14490219;14503306;14508306;14514292;14523461;14530859;14533476;14540322;14541553;14545296;14546915;14547170;14547757;14548480;14549054;14549102;14552386;145…
1357	6	23023522	23192308	67	160542	23023522;23028535;23033058;23036218;23036251;23040997;23041213;23046789;23046834;23051253;23057872;23058905;23061907;23064616;23065692;23066323;23068937;23075696;23081799;23082893;23086688;23088026;23092215;23096093;23099755;23101828;23103446;23103501;23105127;23105348;23105602;23112403;23112486;23115706;23116171;23116407;23118546;23123744;23125122;23127467;23127666;23128896;23131142;23137614;231…
1355	6	108055498	108088411	87	164001	108055498;108056131;108057952;108058504;108058515;108058651;108058889;108059022;108059135;108059297;108059311;108059463;108059588;108060000;108060200;108060544;108061116;108061325;108062961;108063126;108063154;108063300;108064458;108064522;108064545;108064663;108064782;108064911;108065120;108065650;108065856;108065941;108066076;108066777;108066809;108067269;108067286;108067374;108067536;108067709…
487	16	83781995	84078824	135	198374	83781995;83785148;83785415;83787263;83787746;83790686;83791278;83791492;83792114;83792742;83803406;83804108;83804601;83805527;83806418;83810996;83811775;83813422;83819119;83819917;83821665;83822549;83822671;83828916;83830624;83835836;83838168;83838442;83839962;83846215;83846905;83850714;83851097;83855107;83862291;83863218;83863804;83865357;83865432;83865576;83866453;83866772;83866797;83867100;838…
486	16	57712863	57779934	38	207507	57712863;57713037;57713477;57713508;57713647;57716199;57718631;57719972;57725120;57729000;57730225;57730717;57731854;57734836;57735213;57736434;57747650;57755430;57761248;57761435;57762171;57764895;57765377;57765462;57766418;57767209;57767267;57767373;57767759;57767773;57768479;57769500;57771697;57772027;57772632;57773342;57773840;57779934
485	16	55030275	55221625	80	222853	55030275;55031266;55037072;55037187;55039564;55039713;55044348;55044417;55045108;55047656;55049460;55063081;55063267;55064597;55073837;55074972;55074996;55075091;55077286;55078771;55080308;55086115;55089676;55089834;55090192;55095951;55097756;55099260;55101660;55103780;55106008;55106272;55113436;55114415;55114603;55115128;55115460;55116724;55117478;55121494;55125150;55128018;55129305;55130136;551…
484	16	13666119	13897434	105	232108	13666119;13666945;13671095;13677005;13679058;13679280;13679325;13679439;13684745;13687750;13690427;13693089;13694526;13697677;13701034;13701316;13703692;13719184;13721872;13723451;13725499;13733679;13736629;13738651;13738765;13739272;13742800;13749891;13750285;13751305;13753493;13754448;13759150;13762168;13767970;13768271;13772586;13775530;13775801;13776290;13781161;13781229;13781960;13783841;137…
481	16	24022090	24135944	40	258212	24022090;24025293;24025726;24025779;24026118;24026217;24026639;24026683;24026838;24027122;24027611;24028515;24032033;24032231;24034629;24039127;24043656;24047963;24048713;24057115;24061201;24062063;24063494;24063554;24074756;24079384;24085186;24087370;24094544;24096180;24106989;24109899;24110605;24113537;24114524;24130307;24131685;24132462;24134748;24135944
480	16	83270779	83475160	110	280831	83270779;83274806;83275274;83275770;83277510;83277903;83283411;83283795;83284276;83288883;83289317;83289742;83292019;83293589;83297909;83300928;83306891;83307708;83307748;83310556;83312005;83318196;83318954;83322968;83323823;83325182;83329362;83332769;83333772;83335722;83340912;83342497;83342726;83353373;83354139;83356443;83359131;83359145;83359285;83359748;83359811;83360405;83360567;83360591;833…
199	12	86080586	86282438	119	224136	86080586;86081910;86082150;86084245;86084268;86085214;86091678;86092045;86094336;86094444;86099662;86100614;86100772;86101709;86103993;86113020;86113640;86114020;86117441;86118845;86119165;86119812;86121033;86125845;86130091;86130819;86133909;86134589;86134855;86135835;86136656;86136795;86137081;86137624;86137758;86137876;86138382;86138781;86138807;86138933;86138969;86139499;86140522;86140762;861…
198	12	63448713	63913148	200	224601	63448713;63458453;63460025;63474675;63475606;63475917;63476102;63477268;63484170;63487032;63488616;63491136;63492544;63494880;63497859;63500867;63502072;63504322;63504522;63507062;63509564;63511529;63513729;63525834;63531008;63532649;63534146;63535732;63540374;63546527;63547610;63548255;63549875;63552906;63558750;63559930;63567943;63569432;63577634;63577927;63584226;63587396;63591200;63603138;636…
195	12	32367111	32630871	141	245778	32367111;32370783;32370822;32371314;32371921;32374811;32377957;32380044;32380112;32380262;32380327;32382931;32387175;32391404;32392788;32395552;32395928;32397397;32399947;32402421;32404537;32408381;32410882;32411003;32411515;32412008;32413419;32413937;32416572;32419254;32420086;32421943;32422780;32431176;32433524;32433564;32439455;32454786;32455714;32463571;32464996;32465568;32465736;32465749;324…
196	12	103353525	103621337	124	228206	103353525;103358665;103360798;103361535;103363623;103366319;103369892;103370483;103378093;103378514;103381066;103381079;103383804;103383863;103388134;103388218;103390211;103397836;103399309;103406374;103411224;103414098;103414687;103416179;103426683;103435320;103438086;103438666;103439896;103440227;103440467;103440556;103441696;103442785;103444555;103446325;103449224;103452849;103453128;103453694…
191	12	20554186	21429869	331	291040	20554186;20556477;20556780;20557217;20560240;20561133;20561520;20563145;20565700;20566685;20573112;20575950;20577282;20577295;20580540;20581426;20581646;20584366;20584385;20585884;20600526;20603195;20604303;20609118;20612008;20612352;20613408;20623724;20628514;20639076;20639783;20645461;20646469;20646742;20655579;20659642;20669298;20672693;20672827;20674792;20676240;20680642;20681638;20688905;206…
190	12	41896961	42342341	186	310231	41896961;41897746;41898737;41898924;41899916;41900422;41901082;41901523;41902047;41902513;41902675;41903208;41905155;41906563;41911433;41913522;41913782;41913870;41914092;41914939;41915158;41915265;41916940;41919987;41926138;41930066;41930786;41944306;41945295;41947571;41947900;41950660;41952411;41953641;41954168;41955812;41956074;41957180;41958722;41964381;41969528;41971794;41980725;41981832;419…
193	12	10817535	10942415	86	265988	10817535;10821544;10829094;10829573;10830649;10830732;10836141;10836262;10836486;10836724;10837530;10838284;10839407;10840174;10841268;10843011;10845239;10846393;10848659;10849909;10851069;10853588;10856289;10858159;10860148;10860407;10860516;10862029;10864491;10864815;10866250;10866878;10868671;10869001;10870232;10882533;10886696;10886716;10887490;10901224;10906931;10909588;10913006;10914167;109…
192	12	47616665	48223554	182	275071	47616665;47620692;47625830;47637571;47637997;47641391;47646839;47647945;47648837;47651171;47651718;47667027;47672107;47672320;47673793;47677590;47678380;47680463;47684504;47693681;47694205;47694598;47694740;47695902;47699025;47699990;47701260;47702619;47706514;47707019;47711869;47713678;47715856;47716075;47716206;47716246;47718408;47727364;47734408;47749228;47756841;47759864;47760046;47768290;477…
1456	7	50445897	50899191	173	186866	50445897;50449085;50449114;50453170;50454105;50454652;50454735;50454805;50458434;50470166;50470780;50475209;50478452;50483179;50486376;50489013;50493396;50493729;50493783;50497912;50500628;50508325;50515791;50523954;50525129;50526219;50529449;50530309;50532756;50540685;50547922;50549880;50550194;50552718;50554670;50556829;50557592;50559504;50562821;50564078;50567679;50568102;50568841;50569280;505…
1452	7	158857531	158950233	57	204180	158857531;158859446;158859706;158861257;158863532;158863671;158867177;158867817;158871158;158871685;158873007;158874539;158874871;158875098;158876036;158879348;158879421;158884384;158887274;158889485;158890890;158891125;158895069;158902149;158905747;158906510;158907915;158908467;158909554;158912904;158913008;158914238;158916556;158918261;158918678;158919135;158919762;158923089;158928396;158929552…
903	2	197087639	197264476	72	169482	197087639;197089170;197089185;197094365;197103271;197115426;197118604;197131394;197135889;197139208;197140582;197141477;197144114;197144513;197156545;197156677;197161510;197163192;197163295;197166854;197167996;197173923;197174131;197178202;197178476;197178723;197179350;197179814;197180207;197180217;197180307;197180400;197180508;197181124;197181198;197181213;197181435;197197216;197199511;197199812…
900	2	176462949	176731865	96	176787	176462949;176464710;176466425;176479433;176480699;176480822;176481972;176482019;176484823;176484889;176488798;176491190;176494228;176494990;176501624;176503008;176503243;176503649;176507682;176509306;176513027;176513408;176514552;176516674;176528261;176538068;176542886;176544155;176544405;176546026;176546592;176547234;176548093;176548202;176549657;176550614;176551091;176558742;176559938;176560598…
901	2	84547896	85106716	188	173572	84547896;84549721;84549886;84550396;84551453;84559527;84561683;84563121;84564947;84567858;84568192;84569452;84580829;84582428;84582550;84587673;84588219;84588921;84594335;84597769;84600770;84614108;84614253;84616396;84616555;84617066;84618937;84619691;84620086;84620361;84625536;84626166;84630019;84633094;84633405;84634698;84634943;84647464;84650047;84656453;84659327;84660870;84662933;84663517;846…
906	2	13966082	14078617	81	167288	13966082;13969893;13975063;13980792;13983282;13984302;13986892;14006003;14006926;14012063;14012627;14013299;14013576;14015396;14015598;14016047;14018884;14020638;14025226;14027338;14028801;14035501;14036270;14042246;14042373;14042454;14042536;14042635;14042665;14043057;14043111;14043444;14043456;14043740;14043884;14043926;14044062;14044410;14044649;14044708;14044808;14045014;14045143;14045476;140…
907	2	18828226	19137696	112	166529	18828226;18828813;18829423;18830427;18831219;18831655;18832331;18832956;18833112;18833159;18833192;18833713;18835973;18838144;18841373;18843825;18845640;18851955;18853873;18855613;18855940;18857022;18858562;18860080;18860897;18861177;18862252;18864725;18866376;18871888;18873114;18874377;18875493;18876713;18879606;18880805;18883588;18886894;18896140;18897707;18903159;18904406;18905774;18907906;189…
905	2	34816705	34886904	62	167670	34816705;34817941;34818128;34818145;34818701;34819058;34819484;34820883;34821131;34821233;34822326;34822552;34824126;34824548;34824923;34825162;34825274;34825376;34825420;34825667;34826904;34826932;34827342;34827959;34828444;34828551;34828825;34829965;34830768;34832636;34840334;34842322;34851364;34852172;34852992;34853552;34853733;34853842;34855344;34860139;34860670;34861492;34861607;34862055;348…
908	2	46885536	47054405	71	164097	46885536;46886387;46889384;46890749;46893332;46896893;46897673;46898468;46899727;46902190;46903232;46904401;46905700;46907248;46909317;46916037;46922078;46930169;46938259;46940110;46942969;46943123;46945893;46945954;46946555;46953690;46955957;46957787;46968413;46968561;46968980;46969197;46969607;46969959;46971347;46977097;46977766;46997308;46999171;46999185;46999249;47000123;47000758;47001367;470…
909	2	142793614	143033814	116	161400	142793614;142798939;142799085;142803600;142805006;142806722;142809295;142810061;142816992;142819268;142824228;142826033;142826081;142828565;142829961;142838610;142847927;142856143;142860393;142860919;142861643;142866560;142868864;142872352;142874003;142875364;142875692;142876219;142878536;142878882;142880275;142882309;142882649;142883285;142883403;142884804;142885599;142887645;142889173;142890717…
856	22	48598164	48651520	39	101278	48598164;48600769;48601001;48601218;48604241;48607464;48607574;48610438;48613029;48615841;48617565;48617701;48618845;48620730;48623748;48624180;48624527;48624680;48624928;48624962;48625173;48625293;48625729;48626019;48626250;48627138;48629354;48631327;48633262;48638544;48639248;48640106;48640227;48643743;48647513;48649578;48650288;48651298;48651520
819	21	31375582	31481039	74	153439	31375582;31375671;31377958;31379990;31384035;31385845;31389986;31390992;31391903;31398478;31401078;31401850;31403569;31404167;31405608;31405797;31405917;31406655;31406765;31407132;31407294;31408013;31409874;31410125;31410191;31411073;31411705;31411833;31412329;31412461;31412471;31412803;31412950;31413009;31414144;31414263;31415234;31415355;31415492;31415861;31415907;31416203;31416278;31416389;314…
741	1	241465421	241540329	38	116858	241465421;241473555;241479525;241483211;241487942;241488624;241491715;241491863;241492106;241492594;241492682;241492702;241494174;241494504;241494788;241495253;241495319;241495465;241495850;241496447;241499365;241499966;241501266;241505434;241506646;241507082;241507253;241507376;241508485;241509272;241516713;241524325;241525535;241531141;241532485;241538980;241539334;241540329
746	1	17924302	18033485	33	113830	17924302;17930078;17935154;17935607;17936537;17940689;17940892;17948124;17963319;17965434;17965861;17969308;17969353;17974871;17976819;17978704;17988434;17988711;17989031;17994046;17999032;18000514;18009426;18011103;18014270;18025290;18025325;18027268;18027982;18030742;18032960;18033355;18033485
748	1	214154324	214285369	60	112456	214154324;214155503;214157280;214158772;214159644;214159902;214167058;214174458;214174776;214177072;214185196;214195307;214196970;214197388;214201673;214205476;214206012;214206580;214208430;214209600;214215034;214215056;214215078;214218580;214218940;214219718;214220003;214220020;214220185;214220362;214220794;214221314;214225030;214225181;214225398;214225484;214225561;214225860;214226303;214227316…
1050	3	6423912	6722500	91	119321	6423912;6426456;6428384;6428641;6431883;6432064;6432142;6433884;6439158;6439897;6440829;6442518;6446899;6450439;6451873;6469637;6477595;6481461;6492053;6496274;6496653;6498938;6503691;6506975;6507021;6507885;6513129;6524713;6532753;6533362;6534557;6535169;6537905;6538114;6538898;6540656;6541742;6541812;6541837;6543599;6544818;6546099;6546434;6550437;6556114;6558674;6560071;6560916;6570960;6578239…
1051	3	156458227	156701813	181	118401	156458227;156458799;156467000;156467874;156468112;156471143;156474914;156475679;156477140;156478348;156479083;156480842;156483664;156485699;156488697;156489800;156490347;156490684;156491757;156492845;156493341;156494918;156496579;156496986;156497481;156502444;156503128;156504121;156505652;156506065;156508517;156509535;156509554;156510400;156510759;156511853;156512548;156515822;156516099;156517233…
1059	3	61287952	61423330	44	110689	61287952;61290821;61295111;61296420;61298973;61299819;61304580;61305024;61307465;61309848;61311034;61316439;61318215;61320251;61321038;61321703;61322209;61323723;61323784;61324027;61324115;61324235;61324438;61334972;61346033;61346087;61348318;61355479;61357492;61358005;61361173;61366720;61370879;61380905;61381702;61390381;61396184;61405827;61407612;61408837;61414792;61417661;61418572;61423330
610	19	5482700	5727075	88	190055	5482700;5483055;5494891;5495197;5496346;5501132;5504738;5505365;5512958;5513073;5515214;5518319;5526149;5528809;5533894;5538486;5538936;5539136;5541710;5544929;5545648;5546132;5550115;5550242;5550928;5551138;5556987;5564207;5564792;5565605;5569343;5575217;5577693;5585462;5585575;5587541;5588110;5589168;5590010;5590028;5590496;5593528;5594960;5595097;5595241;5596956;5606186;5607034;5609774;5611896…
1491	7	45245363	45521802	82	120789	45245363;45245500;45246584;45247595;45249033;45249048;45250903;45252629;45253807;45257115;45260269;45261124;45267140;45268510;45270852;45278008;45288103;45292186;45295177;45296430;45297528;45298601;45300056;45303592;45307883;45309080;45315521;45323350;45333101;45334113;45334560;45336122;45336230;45338588;45346672;45346963;45349430;45351305;45354518;45356213;45359527;45363092;45371725;45371856;453…
1471	7	8196988	8605666	157	147375	8196988;8197858;8199847;8204434;8205841;8210138;8212236;8223576;8226515;8226720;8229016;8232551;8234217;8235540;8235726;8237906;8243168;8246666;8246742;8247088;8247490;8247627;8248002;8263798;8277691;8282493;8297634;8313528;8331604;8332233;8332562;8333517;8334514;8335024;8336016;8344370;8348055;8349092;8349830;8349891;8350086;8353122;8354708;8356417;8356603;8356909;8357570;8360574;8364995;8365786…
1476	7	2105554	2323161	136	140663	2105554;2106018;2107476;2107944;2108009;2112467;2115121;2118242;2121066;2121311;2122449;2123047;2124503;2124728;2125566;2125587;2126338;2126479;2126540;2126657;2126733;2127978;2129640;2130426;2130903;2132040;2132443;2133491;2133732;2135188;2135203;2136254;2136298;2136683;2137582;2137731;2137746;2138008;2138166;2138845;2138993;2139274;2139863;2139952;2139963;2140105;2140276;2140346;2140497;2140532…
1475	7	94913407	95261502	80	141356	94913407;94926772;94946601;94960146;94962726;94965890;94973435;94973765;94979079;94981207;94985312;94986660;95003015;95005152;95007584;95008620;95016471;95017896;95036756;95044129;95045134;95050147;95055389;95055448;95057575;95068166;95068512;95068526;95068746;95073798;95075815;95080545;95082694;95090364;95091320;95100397;95100863;95104537;95107008;95111951;95114745;95120127;95123989;95128608;951…
1479	7	80338652	80581774	64	135164	80338652;80341006;80341418;80342464;80343417;80348759;80350309;80351867;80352603;80358050;80363488;80364097;80368467;80370508;80372250;80376109;80377142;80381507;80382560;80383025;80383415;80402604;80403046;80404315;80407596;80407705;80408529;80409112;80412847;80414210;80414636;80416023;80418105;80418971;80431157;80432666;80433583;80438379;80440788;80441618;80445946;80454860;80458788;80469522;804…
1304	6	67332029	69070477	774	640869	67332029;67335449;67339458;67340966;67345301;67351841;67353705;67355748;67361888;67362992;67364319;67364478;67364895;67365693;67372844;67380946;67384627;67388067;67394681;67395854;67399470;67406549;67408363;67410566;67414263;67416123;67417793;67422006;67422593;67423356;67433396;67436761;67437129;67439491;67440047;67441421;67441737;67442857;67443143;67444147;67445716;67446254;67450578;67454402;674…
1305	6	144377123	144760537	199	478182	144377123;144391815;144391966;144393043;144398494;144398893;144400405;144405770;144408546;144424089;144428853;144433428;144436070;144436211;144439340;144440501;144440889;144441125;144443023;144443434;144446299;144449969;144452558;144456714;144457894;144458856;144459076;144463547;144463815;144464124;144465761;144467161;144467354;144467518;144467818;144468130;144468423;144468498;144469218;144469373…
1306	6	123108691	123232399	85	442343	123108691;123110537;123112256;123112403;123112480;123112653;123112890;123112903;123114559;123120820;123130848;123132969;123135378;123135763;123138685;123141508;123142414;123142482;123144412;123145488;123148641;123151393;123152142;123154233;123154552;123155130;123156472;123156828;123157464;123157489;123159836;123160007;123160403;123163895;123164194;123164519;123165165;123165418;123166569;123166758…
1307	6	168154314	168515194	128	415947	168154314;168156180;168156270;168156474;168158433;168158444;168158969;168160328;168163873;168164135;168164657;168164940;168171222;168172006;168179912;168193370;168193898;168195344;168195419;168196185;168197229;168199158;168199192;168204482;168207534;168207925;168212241;168212922;168216466;168222582;168222893;168223367;168228809;168230220;168232652;168235601;168239532;168241689;168243725;168243821…
1301	5	145376462	145933264	276	100290	145376462;145376757;145377423;145381669;145384524;145392347;145395368;145397760;145406917;145408355;145409101;145414232;145418438;145419826;145421312;145424849;145425317;145426248;145429341;145433763;145434432;145450586;145450670;145453274;145454654;145454728;145456227;145456435;145457172;145458052;145458855;145459262;145460464;145462225;145463595;145464468;145465914;145466476;145467326;145467340…
1302	5	132139223	132318613	52	100216	132139223;132140023;132141144;132141308;132141974;132142457;132143508;132143651;132143670;132152621;132153568;132162117;132163237;132172226;132173536;132175145;132189319;132189882;132190969;132194406;132194705;132195176;132196638;132201907;132202435;132203932;132204244;132207585;132214893;132217365;132222755;132225006;132239318;132241675;132242383;132245871;132246144;132252575;132255457;132261158…
1497	7	153979910	154030219	31	113356	153979910;153980184;153982031;153984765;153984795;153986804;153986864;153988859;153989376;153991294;153993648;153993675;153993791;153994970;153998347;153998679;154005665;154008135;154009704;154011721;154022565;154022738;154023359;154023549;154024140;154025421;154026255;154027148;154027442;154029620;154030219
1308	6	18433468	19442537	459	415277	18433468;18436907;18438698;18442154;18443596;18444147;18454785;18457004;18460175;18465469;18465663;18465688;18465833;18468409;18468448;18469140;18469990;18470456;18471095;18473389;18473736;18474106;18474224;18474804;18475592;18476462;18477442;18477468;18486494;18487422;18490372;18491853;18491877;18497813;18505178;18510505;18510562;18511090;18514617;18515555;18518755;18518789;18519685;18519760;185…
1309	6	119909030	120806325	494	410343	119909030;119910472;119910628;119912983;119913046;119913252;119913483;119915533;119915629;119918242;119919051;119920475;119921190;119922653;119923490;119924236;119924394;119924552;119924930;119926063;119926438;119926508;119926660;119927134;119927626;119928199;119928257;119928321;119931975;119932083;119933708;119934010;119935092;119935161;119937284;119937321;119938108;119940634;119942478;119942692…
494	16	3588166	3762981	76	161794	3588166;3588535;3590906;3591103;3591690;3591754;3592345;3594622;3599529;3607443;3607456;3613904;3625379;3627971;3628814;3629794;3631339;3631622;3639977;3640784;3645145;3650361;3652601;3654325;3656680;3656964;3658221;3666372;3666911;3671298;3671439;3671536;3673307;3673333;3674915;3675157;3675354;3675768;3676926;3678167;3679653;3679900;3686402;3686588;3688495;3688740;3689785;3692177;3695926;3696943…
490	16	6473309	6567738	66	189094	6473309;6473518;6473844;6475043;6475175;6475904;6476706;6479187;6490922;6497715;6498757;6498814;6499533;6499666;6499919;6502544;6504661;6506571;6511417;6516309;6516568;6518496;6521000;6527082;6527983;6530542;6531649;6531748;6533948;6534581;6534671;6540461;6541531;6544624;6544714;6544785;6545054;6546100;6546329;6546995;6547061;6548349;6552111;6554268;6559335;6560171;6560307;6560608;6561273;6561566…
493	16	9654025	9791801	67	167097	9654025;9666696;9666857;9667226;9668585;9670795;9675128;9675159;9677353;9678080;9684923;9684990;9687602;9687914;9690122;9697411;9698714;9703523;9703985;9704707;9705575;9706816;9707188;9708472;9709866;9709885;9710232;9711199;9711296;9711483;9712202;9715247;9717236;9718601;9724562;9725423;9725967;9726347;9726413;9726941;9727526;9735246;9735870;9735957;9737738;9745682;9750989;9756908;9757590;9763381…
26	10	80072225	80233148	50	202742	80072225;80074164;80085405;80095900;80102286;80110378;80113547;80114389;80116151;80116942;80132072;80136589;80138373;80145895;80153248;80154702;80158375;80161121;80165979;80168032;80174263;80175850;80181400;80185104;80188181;80191084;80192092;80196208;80201638;80217002;80218496;80225305;80225321;80225381;80225414;80225519;80225745;80226003;80226518;80226625;80226858;80226904;80227032;80227291;802…
27	10	2526219	2653631	79	197454	2526219;2528420;2533696;2536500;2539747;2547962;2551549;2551775;2552223;2557113;2559983;2563232;2567178;2567753;2578467;2579812;2581548;2583277;2584515;2585835;2585901;2586009;2586856;2586992;2587007;2588626;2589132;2592000;2592909;2593526;2593872;2594931;2596666;2596873;2597465;2598615;2598868;2599157;2599507;2599860;2601129;2601234;2601309;2601368;2601383;2601631;2601707;2601850;2602119;2602148…
23	10	20680487	20913615	119	206785	20680487;20681477;20681943;20682971;20684410;20684636;20685066;20685468;20685819;20685846;20686201;20686473;20686505;20686516;20686535;20686632;20686687;20686715;20688305;20688507;20688894;20691559;20691791;20694729;20695258;20696766;20698528;20700346;20702077;20706367;20706440;20714402;20717602;20720140;20720432;20722119;20725177;20726394;20727884;20729402;20730520;20732648;20734764;20735022;207…
28	10	87339257	87837168	183	192118	87339257;87341897;87348244;87352365;87353169;87354710;87361055;87371332;87376415;87377563;87384091;87385779;87388517;87391701;87397275;87397520;87400684;87403875;87412940;87415879;87416931;87422802;87425399;87433167;87433267;87437611;87438431;87438834;87444021;87445935;87446192;87446223;87447845;87449034;87454616;87460400;87460421;87464783;87466323;87468565;87472104;87472964;87476927;87479887;874…
972	2	65111763	65203968	41	104994	65111763;65130533;65131373;65133489;65133765;65133805;65133838;65134058;65134324;65134561;65137089;65139174;65139202;65139224;65140092;65140128;65140781;65140951;65141933;65141943;65159063;65161025;65161488;65165521;65166860;65171087;65172805;65176373;65176659;65176898;65176914;65177134;65177168;65177232;65181447;65181562;65191856;65196474;65200435;65202797;65203968
1087	4	180203920	181036502	316	482492	180203920;180204093;180207338;180208066;180208306;180209064;180216198;180221652;180224430;180227528;180229065;180230926;180231987;180232132;180232431;180236783;180237490;180237590;180238905;180238981;180239521;180240304;180240537;180241012;180242496;180251204;180251576;180252507;180253549;180258092;180268930;180269944;180270348;180274766;180277089;180278449;180278680;180280745;180286318;180287051…
1086	4	81063227	81886244	476	493123	81063227;81072495;81072541;81075106;81081277;81084832;81097417;81097524;81098862;81099032;81101883;81103112;81103617;81106716;81112434;81114389;81114460;81118562;81126587;81127533;81135362;81135386;81135658;81137337;81139291;81141094;81141495;81141555;81141738;81148269;81148996;81150045;81154300;81157579;81157937;81158032;81159181;81162011;81165880;81166434;81169327;81169976;81170145;81176970;811…
1085	4	170782064	172028735	526	736184	170782064;170787917;170788280;170788449;170790843;170794326;170795723;170797452;170810473;170815224;170818509;170820097;170830085;170832779;170836916;170837278;170838683;170838935;170840391;170855090;170870370;170880877;170880896;170881021;170881686;170885805;170885925;170889796;170890316;170891284;170896510;170900370;170903275;170906091;170911305;170911443;170913938;170916375;170919639;170933517…
977	2	163220988	163357921	43	100558	163220988;163222786;163223268;163232194;163234614;163237135;163237219;163238618;163241522;163247352;163249675;163251950;163253924;163258286;163262206;163265769;163272461;163274165;163278728;163279080;163279325;163284550;163291981;163302335;163303773;163304744;163307606;163308202;163308668;163314151;163320711;163326486;163329695;163330383;163334481;163338912;163341209;163345347;163349848;163352256…
973	2	191572558	191839539	105	104270	191572558;191574407;191574787;191575803;191576063;191577241;191584164;191584362;191587292;191588334;191588628;191588959;191589498;191590604;191593072;191593228;191595550;191595601;191598671;191600773;191601623;191602045;191603584;191604202;191604938;191605134;191607970;191608752;191609931;191612100;191613353;191617689;191617724;191619613;191621505;191621640;191621739;191621763;191623785;191625693…
971	2	86031240	86178058	42	105229	86031240;86032231;86033012;86033036;86033046;86033152;86041688;86043087;86047497;86050857;86054317;86060944;86065494;86066173;86071885;86072432;86077538;86080990;86081208;86089742;86095529;86097642;86099921;86106628;86110738;86115214;86117496;86117654;86119403;86120069;86132521;86135606;86140312;86144635;86144861;86155414;86157215;86157784;86163909;86168270;86174180;86178058
970	2	178140932	178524277	127	106203	178140932;178150005;178165038;178174222;178176268;178185095;178187739;178188856;178192204;178206084;178212643;178216713;178224549;178227682;178227719;178238136;178239785;178240602;178243379;178246480;178247902;178252261;178261056;178261265;178261308;178262474;178263304;178263909;178264573;178267743;178267979;178269349;178271272;178272059;178275427;178277863;178280076;178281597;178288131;178290952…
979	3	120164319	121281398	353	706016	120164319;120179344;120187017;120187743;120189466;120193866;120209697;120212785;120214617;120215371;120215654;120216908;120217091;120220192;120221684;120226626;120233965;120234404;120235399;120235798;120236900;120238509;120250736;120254192;120264732;120267601;120275621;120277444;120284136;120284337;120284825;120287751;120287892;120292157;120293506;120293595;120293879;120300249;120300848;120301319…
978	2	67267123	67346780	52	100194	67267123;67267193;67267232;67267273;67267819;67268378;67269708;67270907;67271011;67271537;67272452;67272998;67284282;67286104;67287326;67288293;67290737;67291854;67291890;67297326;67298840;67309430;67310631;67315057;67315168;67315629;67319977;67320931;67326062;67326261;67326329;67326580;67326816;67326896;67327234;67327387;67328128;67329926;67330028;67330186;67330265;67330407;67332546;67333073;673…
180	11	71911985	72174405	64	103965	71911985;71915371;71923104;71923660;71926022;71926151;71936430;71938329;71958103;71965272;71966409;71966723;71971573;71974197;71977205;71979278;71981645;71981830;71982022;71983420;71984736;71986976;71988811;71991682;71992099;71998528;71999240;71999708;72009451;72009595;72012038;72014266;72018472;72018759;72019118;72022810;72025140;72026473;72028005;72037907;72046796;72051945;72056023;72060986;720…
187	12	45242446	46015987	281	352029	45242446;45245300;45247107;45249158;45249185;45249626;45252675;45258092;45260218;45261395;45264450;45265397;45265490;45271022;45272245;45272852;45274273;45276010;45278067;45283087;45283149;45283384;45286042;45289684;45289959;45291752;45292053;45293627;45296281;45297463;45301219;45319123;45320815;45325184;45325226;45325273;45325888;45326462;45326763;45328882;45330382;45331881;45334721;45337104;453…
184	12	69827140	71089173	416	556713	69827140;69827409;69829101;69830330;69835633;69835770;69838164;69851714;69854857;69855550;69857717;69858563;69862239;69864564;69871811;69880170;69881238;69885158;69885673;69886022;69886787;69887228;69891562;69892858;69893003;69893650;69895412;69897627;69899403;69902685;69903412;69903615;69910485;69910975;69916493;69916816;69917059;69917816;69917879;69925695;69931270;69934994;69939202;69940705;699…
185	12	24294325	24921283	240	472433	24294325;24294895;24299120;24304934;24307998;24315543;24321707;24321754;24324872;24327261;24327613;24332483;24333006;24339782;24346629;24348985;24357850;24358223;24358772;24360019;24361184;24361441;24363089;24368016;24375905;24376235;24377109;24380124;24386136;24395439;24398648;24406379;24414521;24414936;24424019;24428527;24431733;24437523;24438264;24440136;24441990;24448430;24449026;24452867;244…
188	12	110203884	111246411	421	340972	110203884;110204431;110207341;110208055;110208864;110209023;110209615;110212392;110213285;110213795;110213909;110213978;110214170;110214825;110216794;110217182;110217460;110219579;110225016;110230597;110234939;110253522;110256033;110257515;110274856;110278054;110279079;110284516;110301273;110319273;110329808;110336172;110345480;110345972;110346308;110347731;110351850;110352548;110353511;110358273…
189	12	59142287	59464453	141	332269	59142287;59147223;59158391;59159829;59160261;59162199;59168763;59174247;59187734;59191322;59192925;59195192;59196141;59200401;59203400;59207488;59208077;59209270;59213486;59217821;59218133;59218511;59220366;59221432;59226367;59227259;59229645;59230852;59231073;59231237;59235008;59236746;59237491;59238401;59240028;59243725;59244041;59244060;59244736;59244905;59245857;59245903;59246136;59246188;592…
1464	7	131865950	132040325	61	158301	131865950;131868482;131868848;131878459;131882339;131883880;131889014;131891027;131899094;131908947;131910891;131915692;131918236;131920310;131920773;131921978;131922804;131923859;131924265;131925601;131927649;131929784;131930740;131930988;131931667;131931784;131932712;131932985;131943220;131952684;131956283;131959389;131960624;131968500;131972965;131974148;131979097;131979759;131981133;131982301…
869	2	212782888	213400300	282	374376	212782888;212784043;212784261;212784857;212786138;212787068;212788576;212789585;212790629;212790663;212791103;212791173;212791435;212794908;212795490;212795945;212796518;212796606;212797698;212797819;212797889;212797979;212798256;212798398;212798527;212798614;212799167;212799255;212799324;212799446;212799473;212799841;212799877;212800097;212800746;212803437;212803652;212803832;212804408;212805075…
868	2	118155277	119481169	367	375586	118155277;118156203;118157316;118163071;118169586;118175014;118176769;118180523;118181548;118186772;118187189;118190193;118194666;118196044;118208198;118210357;118215289;118215952;118221502;118227989;118240593;118240746;118246692;118258285;118259717;118267002;118279545;118283539;118284823;118285471;118287308;118289816;118291115;118291308;118292030;118292157;118293298;118294594;118301046;118301213…
864	2	38324955	38605936	151	431695	38324955;38324967;38324984;38325440;38326374;38330656;38330714;38345172;38345791;38346952;38347174;38348414;38348620;38348658;38351292;38355611;38357293;38360449;38364992;38365039;38365557;38368391;38369636;38370020;38372402;38375239;38375521;38376899;38377537;38378924;38379362;38380103;38380272;38381104;38381594;38382577;38382779;38383117;38383400;38384105;38386545;38394980;38397498;38398877;384…
867	2	55961277	56485093	177	376135	55961277;55971156;55973237;55974418;55982751;55998235;56004508;56016038;56018151;56018924;56021014;56021136;56021151;56022684;56022920;56023604;56023615;56037836;56044866;56046394;56049315;56051675;56057996;56058280;56059249;56061758;56062698;56065103;56066615;56068328;56070866;56071504;56074565;56078540;56080665;56089767;56095973;56099752;56100009;56100916;56100931;56105635;56106267;56106418;561…
866	2	242269008	242852853	161	395283	242269008;242274142;242275944;242276244;242279118;242281600;242285501;242289419;242294492;242301886;242301967;242304791;242309790;242312016;242317307;242317973;242318783;242326069;242338314;242349648;242350630;242351679;242351813;242354828;242355669;242364178;242366377;242368325;242377786;242378348;242380748;242383747;242384976;242388225;242393658;242401707;242405170;242405521;242412975;242413273…
882	2	164195069	164405068	91	234682	164195069;164197011;164203155;164205666;164208634;164209044;164212658;164213097;164213112;164213157;164214584;164216769;164224944;164225543;164227367;164231109;164231246;164235155;164236344;164237959;164240382;164243301;164244389;164251982;164253612;164254811;164257342;164262779;164264114;164266112;164266881;164273659;164274329;164275108;164275225;164277459;164277483;164279465;164281219;164281507…
881	2	125886504	126854704	417	247767	125886504;125886898;125888924;125897314;125898529;125904974;125910890;125914896;125919421;125920005;125923266;125941379;125949854;125954746;125964061;125965615;125967214;125967642;125969706;125972677;125976539;125979513;125980037;125984198;125986611;125988863;125991258;125991761;125992695;125992814;125995306;125995862;125997559;125999386;125999456;126000210;126001595;126003060;126003302;126004586…
887	2	4405328	4468846	75	205187	4405328;4406096;4406170;4406489;4406560;4406874;4407145;4407584;4407809;4408154;4408236;4408263;4416389;4420100;4421452;4421685;4421727;4421759;4421814;4422327;4422757;4423208;4424004;4424788;4427185;4428540;4431952;4433574;4434125;4434374;4434450;4434590;4434660;4435219;4435654;4436531;4436566;4436703;4436895;4437263;4437650;4437880;4438623;4439034;4439226;4440401;4440954;4441750;4442290;4443641…
886	2	5627484	5691142	105	210130	5627484;5633003;5639822;5640524;5641527;5643360;5644205;5647102;5647482;5648265;5648938;5649053;5649116;5649553;5649583;5649759;5649777;5651563;5652061;5652082;5652119;5652445;5652510;5652588;5652659;5652703;5653041;5653094;5653188;5653233;5653616;5653722;5653739;5653906;5653923;5654085;5654127;5654456;5654636;5655150;5655226;5655278;5655383;5655482;5655587;5656199;5656214;5656267;5656578;5656597…
889	2	238577093	238759297	112	199518	238577093;238577425;238578632;238579006;238579468;238581406;238581449;238582181;238582225;238582474;238582823;238583377;238583472;238583504;238584285;238584441;238587571;238588494;238588508;238590937;238591165;238594684;238601458;238601471;238601542;238601641;238601947;238602083;238602307;238602319;238602393;238602446;238602559;238602633;238602896;238602955;238617679;238618013;238618117;238618385…
773	1	80773433	80969729	58	101277	80773433;80791436;80792062;80792715;80797207;80797526;80803232;80803618;80803880;80807571;80808320;80815166;80816615;80826112;80827002;80830439;80832800;80834890;80835821;80845289;80847568;80849146;80851547;80855545;80855632;80861250;80862429;80863044;80874311;80877667;80880337;80882990;80885504;80892992;80895763;80897388;80898728;80906016;80914198;80926005;80930089;80930216;80933539;80933921;809…
779	20	61736711	62264760	158	327567	61736711;61738974;61739115;61739840;61743888;61745689;61747075;61747522;61751308;61752206;61753272;61753681;61754979;61756032;61757535;61757865;61760067;61762550;61762832;61765105;61767431;61768569;61768818;61770485;61773955;61779384;61779588;61780193;61784206;61784270;61800596;61806215;61814080;61820685;61821021;61821247;61822479;61834092;61844363;61856471;61863641;61876874;61880073;61882661;618…
74	10	108138670	108289513	83	120536	108138670;108139803;108144276;108150468;108151568;108151579;108151666;108152330;108152383;108152792;108153253;108153270;108153596;108153863;108154476;108155273;108155614;108157733;108174727;108175437;108179114;108181074;108181912;108183341;108184154;108185536;108186474;108187681;108189314;108190151;108197535;108197802;108197949;108201082;108204362;108204642;108206990;108207024;108208534;108210264…
1045	3	73964131	74045528	53	127164	73964131;73966865;73967373;73972126;73973101;73973241;73978470;73984995;73992241;73992289;73992347;73992880;73993579;73994008;73996309;73996607;73998817;73999286;74000573;74004788;74007705;74007964;74008210;74008589;74009456;74009918;74010055;74011879;74012220;74012700;74012758;74013170;74014168;74014458;74015110;74015909;74017115;74018446;74018696;74020622;74022748;74023002;74023760;74024197;740…
1048	3	19789885	20201347	106	120871	19789885;19792285;19797285;19797381;19802307;19821450;19822550;19823936;19827307;19830215;19834036;19837250;19837410;19843670;19855250;19857316;19859262;19859867;19859882;19862016;19862444;19869004;19869359;19872183;19879003;19880610;19883454;19891836;19893312;19894880;19894895;19895666;19895885;19913461;19925219;19935779;19944765;19947506;19948263;19949355;19949870;19950243;19951226;19951261;199…
665	1	175531258	175631466	54	189871	175531258;175532121;175532798;175536420;175536614;175536679;175536799;175537202;175537875;175538220;175538268;175539486;175539757;175541008;175541447;175543332;175545174;175547349;175547936;175548384;175550597;175554119;175554196;175555579;175555992;175556226;175556537;175556952;175557272;175557478;175557730;175558753;175558982;175559892;175561372;175561800;175564438;175568119;175571039;175571538…
664	1	55032450	55131673	45	190378	55032450;55033488;55034304;55037164;55041423;55042620;55045311;55045330;55045547;55045589;55052401;55052464;55060888;55061281;55066600;55067533;55070657;55075341;55075714;55084979;55085562;55085608;55085966;55089163;55089922;55090083;55096654;55098051;55099494;55100883;55101051;55101527;55102889;55103253;55104406;55106598;55108237;55108479;55111942;55113675;55115757;55128368;55128914;55130615;551…
1267	5	143096061	143259346	60	126712	143096061;143097450;143099716;143102440;143106132;143106725;143109200;143110830;143118460;143118584;143122539;143126370;143127896;143129951;143131166;143132206;143132304;143133586;143135810;143136494;143136541;143136551;143137094;143137755;143139787;143140928;143148166;143154399;143154847;143155714;143155726;143165361;143167247;143169773;143175887;143176539;143184112;143185121;143187847;143206718…
1265	5	149694728	150019317	99	127479	149694728;149704854;149705385;149711577;149711747;149716652;149722058;149726404;149729198;149729945;149731097;149736286;149736363;149742825;149749409;149755744;149762739;149770058;149780952;149783694;149783879;149786925;149790612;149790968;149792791;149802650;149804371;149807964;149815701;149818986;149822868;149828930;149835557;149837252;149837738;149839354;149848457;149853272;149854455;149854982…
1264	5	32214314	32442464	89	128053	32214314;32218528;32219206;32219326;32228937;32231860;32232233;32233691;32235933;32240278;32240904;32241658;32242660;32242960;32247907;32250504;32252874;32257768;32258853;32263316;32264068;32265384;32265657;32268135;32268487;32273091;32276196;32276452;32282435;32283926;32285641;32291726;32294044;32294821;32298280;32300434;32301597;32303413;32305004;32306745;32308967;32310673;32311603;32312535;323…
1466	7	9022436	9084797	40	153492	9022436;9028272;9028776;9031694;9035991;9040514;9042223;9047561;9047619;9050893;9054353;9057195;9059372;9061367;9061427;9063227;9063282;9063708;9066635;9066994;9067061;9067287;9067808;9070620;9071087;9071336;9071674;9072035;9072074;9072132;9072708;9074732;9075180;9078379;9080312;9080431;9081906;9082613;9083937;9084797
1019	3	130028369	130244212	112	160534	130028369;130031093;130032855;130042120;130046339;130059701;130062782;130064120;130064320;130064629;130064882;130065842;130066689;130067074;130067142;130067212;130068383;130069074;130069305;130069619;130069775;130072055;130072229;130072363;130072632;130073450;130073528;130073708;130073776;130073984;130074113;130074138;130074359;130075714;130077507;130080080;130082753;130085783;130087535;130089335…
1317	6	164978002	165437473	187	296824	164978002;164978396;164978538;164980855;164982078;164991379;164992226;164993809;164996822;164997609;164997760;165001100;165002786;165003210;165004925;165005689;165008100;165008849;165010353;165015489;165021365;165025182;165025679;165034423;165037763;165038859;165040362;165040965;165043124;165046381;165049856;165053828;165053938;165056535;165059361;165059457;165060279;165064246;165066376;165068324…
1316	6	99675908	100277811	231	301926	99675908;99681463;99692897;99695707;99699252;99701622;99701635;99702210;99702599;99703420;99704270;99705552;99708653;99712921;99713978;99718118;99726388;99729819;99744554;99749532;99755911;99756591;99757001;99757255;99758191;99759026;99759280;99759432;99759827;99760489;99761001;99761664;99762201;99768270;99771540;99772200;99774442;99774534;99774964;99776883;99782008;99785354;99787550;99789499;997…
1315	6	762844	1113510	168	312429	762844;763146;763445;764879;768746;776814;777659;777683;778145;778678;779306;781938;790389;799056;802330;803660;805946;811363;816511;818643;821883;822013;824510;824529;828102;828649;828903;830957;832970;840081;840773;841966;845546;847256;848452;851744;853441;867746;869166;870680;870700;871094;871336;871483;872390;872415;872437;872465;872514;872777;872808;872870;873003;873019;873032;873131;873622;…
1312	6	148450094	149187694	251	341680	148450094;148452276;148453687;148453819;148453937;148455825;148465263;148469235;148476965;148479081;148484404;148485687;148485720;148498729;148502888;148519073;148520745;148521536;148521811;148528576;148528920;148529235;148529502;148530075;148536286;148537717;148539959;148552580;148560518;148563224;148563248;148569583;148574122;148583256;148583857;148584115;148587007;148590625;148591284;148593647…
1310	6	66052675	67008262	488	405448	66052675;66053423;66055189;66058342;66058927;66066515;66070703;66075191;66075905;66075988;66077800;66084869;66085848;66095105;66099581;66099878;66103115;66106901;66118423;66122499;66127163;66134769;66134810;66140183;66140631;66143736;66144068;66144962;66145569;66146008;66146028;66146251;66146700;66146819;66148091;66148977;66149454;66150937;66151781;66151933;66152159;66152204;66152344;66152366;661…
1318	6	168983720	169278202	145	277671	168983720;168984774;168985028;168986293;168996190;168996351;168997990;169001296;169013720;169016749;169018636;169020281;169021013;169023463;169024700;169027971;169029503;169030320;169032543;169033772;169033985;169034117;169035779;169036658;169049192;169050608;169052306;169052997;169061950;169063797;169073660;169074455;169074585;169076039;169076051;169077032;169077113;169077236;169077913;169078281…
1011	3	2992545	3292235	126	176520	2992545;2993588;2994542;2996616;2997002;2998514;3000612;3001859;3002619;3003990;3009473;3016149;3016969;3019734;3019897;3020199;3023466;3025388;3032312;3034785;3036817;3041589;3052201;3052815;3053171;3060445;3062578;3066364;3066633;3069536;3069970;3072365;3072381;3073418;3075948;3076515;3077397;3078814;3079856;3082429;3087591;3093955;3104219;3108280;3115856;3128707;3140998;3141008;3148179;3150311…
319	13	108210893	108320792	62	151897	108210893;108216109;108216853;108218260;108219665;108226564;108231681;108231784;108232561;108233676;108234379;108235887;108236047;108236130;108237162;108238714;108241655;108247303;108247733;108251508;108252738;108253660;108253687;108253747;108254091;108254185;108254337;108254401;108254542;108254829;108255143;108256127;108256146;108256541;108257107;108257762;108258709;108258898;108259271;108259430…
318	13	111049683	111134789	38	153846	111049683;111053791;111060933;111065573;111065635;111067405;111068105;111068653;111068991;111073592;111077775;111081183;111083783;111084378;111085650;111088226;111096730;111099588;111101102;111104670;111106841;111106884;111110569;111111737;111113784;111114026;111115180;111115228;111115876;111117548;111118344;111118484;111122614;111123435;111124770;111129672;111134618;111134789
310	13	78034782	78665091	254	166879	78034782;78036941;78038421;78045912;78048926;78049431;78050642;78053727;78055790;78055855;78061165;78065421;78065755;78066980;78073979;78075180;78084656;78097663;78113377;78121398;78128606;78131759;78134554;78134675;78135390;78141301;78149064;78149684;78152297;78152766;78153228;78154661;78155543;78157055;78160999;78164028;78164452;78166144;78166318;78167535;78171191;78178857;78188125;78194267;781…
317	13	37141651	37242166	73	154647	37141651;37143345;37143693;37147846;37148278;37148535;37148806;37148837;37148978;37149190;37151234;37152178;37152193;37152231;37152548;37160554;37162414;37162636;37163998;37164246;37164843;37165010;37165023;37165138;37165607;37166310;37166425;37167006;37167033;37167728;37168047;37168072;37169028;37169215;37171522;37171964;37172449;37172598;37174070;37175503;37175718;37177490;37178137;37178694;371…
314	13	108568076	108708485	64	159013	108568076;108569888;108571151;108576604;108578705;108596904;108607646;108612190;108617962;108620487;108629326;108629433;108629711;108630245;108630269;108630307;108630637;108630786;108631194;108631393;108631596;108632114;108632728;108633879;108634343;108634453;108634633;108635261;108635543;108636571;108637128;108639857;108640298;108641072;108641514;108645414;108647488;108648806;108651518;108653688…
1334	6	147363522	147984647	185	206439	147363522;147375349;147377399;147379728;147387921;147389911;147395528;147403691;147409164;147412423;147415408;147418018;147418104;147419170;147429632;147441809;147445624;147453680;147455502;147455829;147459765;147463361;147464313;147464886;147479273;147482096;147491324;147491775;147492098;147500450;147500947;147504025;147504963;147510098;147511267;147514999;147517772;147519826;147531562;147536977…
1336	6	156393066	156561108	65	194795	156393066;156395081;156396363;156398549;156398667;156399057;156402593;156403814;156404435;156404636;156407166;156411518;156427292;156428388;156431856;156433375;156436673;156446402;156446855;156450064;156452865;156458776;156462217;156462898;156465622;156468860;156470502;156471541;156473438;156474627;156475835;156477098;156481806;156488040;156489411;156491089;156498648;156500917;156503349;156503944…
1331	6	169678583	169736172	40	216376	169678583;169679547;169680537;169682283;169682294;169683318;169683528;169683692;169685784;169687378;169688576;169689606;169689675;169689797;169689822;169697028;169697044;169699198;169703721;169707107;169712122;169712479;169718273;169719499;169720699;169721821;169722132;169723425;169723497;169723684;169723762;169724179;169724224;169724434;169724575;169728163;169731425;169732352;169732847;169736172
1330	6	1309580	1379994	50	219060	1309580;1316016;1318711;1326826;1329748;1330891;1333266;1334409;1334861;1335849;1338265;1338570;1341652;1346515;1346541;1346561;1346989;1347118;1348793;1349830;1350471;1356394;1357464;1359169;1359869;1359937;1360139;1362793;1363227;1364471;1364691;1364866;1365073;1365244;1365650;1365883;1366052;1367061;1367405;1367583;1369253;1370689;1370848;1372161;1372681;1374383;1375489;1377048;1379925;1379994
1521	8	124542519	124684062	76	291025	124542519;124542931;124548626;124551122;124555246;124558058;124572190;124572235;124572360;124572407;124573973;124574564;124574704;124575164;124575630;124576636;124580120;124581848;124584186;124584863;124592466;124596067;124596594;124597657;124600270;124600585;124600906;124604789;124608201;124609404;124610021;124610841;124613453;124614165;124614322;124615071;124616342;124617007;124617208;124618447…
964	2	138427840	138560292	55	110217	138427840;138430013;138431497;138438184;138445566;138446253;138447165;138453216;138453622;138454648;138456405;138458059;138461694;138463230;138466266;138467846;138468260;138470287;138471543;138476268;138480356;138483479;138490904;138492178;138494608;138494961;138496423;138502888;138504155;138506892;138508646;138509132;138511042;138514874;138515772;138516198;138516214;138517616;138519970;138520478…
965	2	120039198	120274441	76	110199	120039198;120040242;120041892;120044150;120054485;120054852;120059304;120062371;120063132;120064034;120066444;120076056;120079689;120090585;120093372;120101540;120101671;120104219;120104433;120106169;120106971;120115980;120122916;120123090;120123689;120128459;120129200;120137156;120139452;120140743;120143105;120150551;120161927;120163651;120170911;120171425;120174497;120175795;120175940;120177099…
966	2	69517323	70012766	115	109921	69517323;69519053;69524558;69539118;69541858;69542799;69546333;69558752;69560938;69570835;69579909;69580398;69580737;69589956;69592226;69592810;69594347;69594696;69600846;69601925;69602487;69603743;69605060;69610181;69619575;69627876;69629701;69637470;69645349;69657845;69660880;69663709;69672932;69678404;69678486;69678861;69680983;69681808;69685525;69690674;69692250;69698471;69698814;69702234;697…
967	2	220781678	220857457	50	109500	220781678;220782111;220782792;220782890;220783523;220785929;220786274;220786583;220787390;220787589;220788284;220789290;220790029;220791184;220792999;220794777;220796250;220803340;220803429;220809390;220809469;220811622;220814239;220821277;220821785;220822166;220822825;220822848;220822885;220822914;220823266;220825488;220826468;220826966;220827975;220828921;220829348;220830251;220831218;220833251…
878	2	66976166	67223999	128	273426	66976166;66981821;66983230;66983383;66991586;67003156;67007966;67009775;67010499;67012679;67019012;67019506;67021598;67021932;67025171;67033655;67034310;67034586;67034987;67035708;67036251;67036536;67041572;67041892;67043734;67044440;67048734;67053654;67057977;67058000;67059239;67059257;67063686;67064083;67064847;67065807;67069029;67069484;67071920;67073999;67074597;67075546;67076033;67089230;670…
876	2	401196	672826	94	280835	401196;401746;405641;412993;415922;421373;421462;421487;422786;427717;427772;428872;430199;440971;441137;441663;445380;445709;447828;447865;451177;453835;454246;462473;462789;463054;465788;468705;472225;477053;478304;484468;486259;491146;493083;493312;498502;498591;499460;499523;500845;501005;501030;501360;501533;501974;503962;504011;504211;504829;506992;514563;520928;524220;526089;533496;533550;…
877	2	141522409	142091830	211	280472	141522409;141523403;141526375;141527846;141538205;141541093;141549606;141550391;141550744;141554250;141567297;141575457;141580489;141589877;141594012;141598888;141606060;141610823;141617421;141617703;141621004;141621730;141633150;141633460;141633709;141636305;141644445;141644994;141645897;141653038;141654218;141656355;141658452;141659365;141661924;141665057;141666019;141669161;141669251;141670129…
875	2	117238201	117818402	277	284371	117238201;117239158;117240714;117244884;117245634;117245820;117248883;117253403;117256853;117261202;117266213;117267646;117269950;117274133;117286392;117292789;117293728;117293797;117294103;117295959;117296780;117297120;117300410;117301603;117305505;117307260;117309773;117310272;117311750;117314892;117318708;117319143;117319203;117322704;117325914;117326268;117333462;117334309;117341193;117341437…
872	2	37262275	37417498	146	348869	37262275;37265330;37265563;37266732;37267428;37277458;37280034;37280378;37285160;37286374;37286927;37288683;37290859;37291104;37291769;37292734;37294299;37296092;37297285;37297306;37298252;37299499;37305100;37305457;37306340;37310651;37312197;37315218;37315960;37317063;37317162;37318727;37319156;37319939;37320917;37321568;37327151;37329781;37336059;37337079;37338314;37338369;37339439;37345588;373…
870	2	11999032	12195136	115	368174	11999032;12000347;12001631;12007353;12009292;12009563;12010851;12011260;12027247;12040771;12040946;12040982;12041237;12041365;12041605;12041637;12041735;12041819;12042058;12042093;12042160;12042190;12042344;12042952;12043092;12043286;12043329;12043342;12043448;12043499;12043529;12043649;12043679;12043798;12043849;12043910;12043959;12043973;12044022;12045262;12045389;12045408;12045576;12045771;120…
871	2	109654208	110104918	227	350536	109654208;109654225;109654482;109654709;109654806;109655093;109655228;109655254;109655865;109655920;109655992;109656003;109656105;109656302;109656431;109656536;109656586;109657115;109657234;109657250;109657319;109657453;109657715;109657819;109658439;109658716;109658750;109658823;109659061;109659618;109660925;109663938;109664164;109664195;109664364;109664937;109666428;109667026;109667660;109669760…
890	2	157484440	158091032	222	197380	157484440;157484745;157486270;157491275;157500110;157503241;157505862;157505932;157507084;157507912;157508747;157510838;157515711;157518766;157520890;157522211;157524491;157524696;157525391;157529654;157531323;157531566;157532774;157534775;157535910;157537826;157538248;157541780;157544069;157544346;157546265;157551128;157551963;157552707;157554757;157556119;157556595;157571540;157579500;157581651…
894	2	48006205	48812846	198	194190	48006205;48011955;48012406;48017651;48024402;48025764;48030022;48032572;48046807;48050196;48051463;48052196;48054611;48056249;48061221;48062237;48062371;48062761;48063241;48071041;48074333;48077079;48079978;48080645;48086854;48097827;48098652;48099498;48103221;48107893;48119417;48121603;48135517;48137033;48139143;48140495;48159370;48160226;48160282;48164539;48165857;48166824;48169673;48175452;481…
898	2	173609988	174140562	211	179390	173609988;173611751;173611860;173613400;173614042;173614498;173615991;173616021;173616327;173617662;173620734;173621648;173623394;173630328;173632904;173633985;173645350;173646865;173647356;173652401;173653096;173654244;173656631;173659449;173661753;173663787;173668222;173672242;173673557;173674013;173676544;173679287;173681954;173685345;173687194;173689276;173690183;173690322;173692180;173692538…
899	2	174709499	174893136	58	177090	174709499;174710548;174714310;174719455;174719810;174719849;174723195;174727014;174727456;174728375;174728605;174730962;174731346;174732315;174736932;174737487;174741386;174741950;174744166;174752343;174752412;174770289;174772446;174779451;174784367;174785450;174788970;174789917;174790295;174795379;174799136;174799146;174806759;174807551;174808990;174809725;174810187;174821180;174825272;174832889…
646	1	227070118	227673538	176	281401	227070118;227077674;227080395;227088606;227089547;227096158;227096284;227098543;227100654;227100684;227102044;227106587;227107201;227108023;227109444;227109594;227110230;227111142;227127251;227128183;227128799;227128982;227129081;227131287;227131453;227133011;227133992;227134923;227135637;227138158;227138389;227141571;227141604;227142835;227142856;227145475;227148562;227148707;227149840;227150691…
769	1	150537925	151002554	124	103838	150537925;150539971;150545069;150549526;150550924;150557386;150569463;150569507;150570014;150572097;150576596;150583839;150589492;150592448;150602685;150604958;150606175;150606424;150606817;150607198;150607812;150610121;150611766;150612387;150612511;150612723;150613486;150614675;150627493;150629405;150630588;150633433;150642166;150656791;150659070;150664858;150665213;150667699;150668501;150674694…
1075	3	159370173	159475491	53	102048	159370173;159377709;159378082;159379535;159380073;159380672;159383002;159387718;159389835;159390268;159396218;159396677;159400532;159401000;159401073;159402214;159402237;159403803;159404816;159405171;159406475;159406876;159413837;159417771;159419710;159421700;159422993;159426190;159427402;159430053;159431145;159431176;159432243;159432468;159432791;159433949;159435976;159439643;159439933;159443327…
1071	3	155817710	156004235	87	103963	155817710;155822736;155824878;155825610;155827945;155830211;155831114;155831386;155832488;155834235;155837453;155839029;155844873;155846125;155848361;155848500;155849973;155853324;155856663;155856720;155871897;155873912;155873974;155874963;155878015;155879297;155881280;155883788;155885071;155887228;155887544;155888825;155889856;155891630;155893363;155894710;155895423;155897759;155902720;155903742…
1094	4	168045848	168239797	125	295778	168045848;168047425;168057337;168058156;168061105;168066285;168068996;168071743;168073317;168074701;168076592;168077419;168077714;168080941;168081801;168083898;168099900;168100007;168101374;168105007;168115689;168124349;168125825;168131476;168132818;168133759;168134540;168147188;168150327;168150985;168152910;168160823;168161255;168162770;168163697;168164250;168167491;168169600;168171573;168175041…
1096	4	120705619	121741475	423	294803	120705619;120708170;120709413;120712280;120714908;120716159;120717301;120721925;120722274;120723024;120723401;120724254;120729462;120736288;120737575;120743334;120746006;120746690;120749623;120749813;120750201;120753496;120754171;120758543;120758713;120759314;120759497;120759818;120762710;120765250;120767517;120773481;120780388;120782884;120785233;120790233;120798236;120798982;120803629;120806264…
1097	4	114075092	114674498	233	278597	114075092;114075857;114083671;114086109;114093044;114100901;114107471;114120284;114121610;114122938;114123157;114127018;114127558;114132274;114132729;114132878;114133131;114133238;114133380;114133527;114133798;114138237;114139974;114140005;114140027;114140049;114140087;114140162;114140176;114140238;114140257;114140309;114140406;114140444;114140586;114140656;114140668;114140691;114140703;114140734…
1091	4	97910597	99111338	742	333095	97910597;97916038;97917209;97921574;97927620;97927765;97934499;97937608;97941854;97943350;97948468;97951851;97954523;97954822;97955942;97957514;97959054;97961148;97968499;97969469;97971347;97971773;97976557;97976865;97981937;97993927;97995046;97995074;97998740;98002290;98003207;98007256;98008250;98010507;98012810;98013171;98022155;98022468;98026308;98031260;98041279;98048639;98051306;98053025;980…
1093	4	176130612	176392069	160	325783	176130612;176134139;176136543;176142927;176143341;176143590;176146335;176146884;176147273;176149195;176149795;176150781;176152846;176161127;176162983;176165176;176166622;176167529;176169450;176170163;176170353;176170592;176173261;176173347;176177574;176177674;176177801;176177836;176177882;176177909;176178162;176178603;176178660;176184175;176184372;176184445;176184545;176184593;176184668;176185124…
675	1	35117884	35206154	58	174951	35117884;35117925;35118948;35119412;35126175;35126463;35127271;35128112;35129211;35129279;35129704;35129846;35129870;35130073;35130648;35131427;35131548;35132219;35135129;35136668;35140317;35150754;35150903;35151885;35153329;35154976;35156801;35159199;35159774;35160186;35160327;35160342;35161930;35162332;35162382;35162954;35163112;35163328;35163770;35164313;35164757;35165559;35166186;35166671;351…
676	1	147053675	147249738	75	174020	147053675;147059890;147061016;147068704;147073756;147076780;147077494;147083080;147084493;147085793;147088273;147101355;147101915;147103569;147114073;147114637;147114680;147129599;147131025;147132221;147139907;147148880;147163945;147169805;147174073;147176322;147180135;147182811;147183455;147184795;147187032;147187557;147189137;147189737;147190499;147193802;147194467;147194789;147195742;147201336…
677	1	198848518	198989135	133	172512	198848518;198851497;198851508;198851834;198851997;198852947;198853095;198853145;198853315;198853369;198854203;198854463;198855014;198855679;198857505;198857515;198860426;198860993;198861713;198861740;198862609;198862752;198863284;198865177;198865986;198866556;198866678;198866903;198866935;198867628;198867739;198868454;198869463;198869702;198870179;198870836;198873705;198877203;198885321;198886815…
1098	4	18125296	18583213	297	277791	18125296;18126836;18128056;18128781;18128809;18128879;18129061;18130322;18130751;18131121;18131229;18131585;18132106;18132130;18132262;18132661;18132706;18133038;18133495;18133797;18134027;18134201;18134346;18134391;18134621;18135049;18135467;18135629;18136158;18136479;18136767;18137369;18137485;18139044;18139693;18139836;18140078;18140531;18140612;18141014;18141654;18142748;18143651;18143838;181…
1099	4	177622848	177971881	203	275493	177622848;177632218;177633092;177633338;177633556;177642112;177648648;177651017;177655130;177655870;177660752;177672036;177672616;177675113;177676581;177680152;177681612;177681812;177682057;177683051;177690727;177694094;177694834;177696565;177698266;177698426;177698515;177703258;177709756;177711162;177715776;177719975;177726424;177730383;177732124;177740700;177743651;177744188;177744353;177744444…
672	1	212378080	213097637	281	178544	212378080;212389801;212390101;212391954;212394364;212401103;212417717;212421520;212429194;212429404;212431200;212432926;212434241;212439020;212450399;212453262;212456723;212467935;212470340;212472734;212474910;212479877;212482070;212483967;212485375;212486274;212496356;212498565;212500369;212519947;212535032;212543806;212549360;212550531;212569336;212575539;212586736;212589557;212600327;212607404…
673	1	237892853	237987561	57	177230	237892853;237894098;237894391;237904256;237913754;237917847;237918356;237920839;237922237;237924923;237926482;237926512;237926669;237926873;237926926;237927554;237929545;237929650;237930212;237931378;237932040;237932356;237935580;237937159;237937258;237937487;237937579;237937705;237938807;237939263;237939429;237940597;237940611;237941144;237941432;237941456;237941906;237942516;237942759;237943172…
1533	8	41208303	41691924	155	194838	41208303;41208429;41209708;41210709;41212057;41212148;41214320;41215260;41216543;41216740;41217108;41217329;41217638;41219333;41220351;41220543;41221144;41223371;41224409;41225398;41228589;41228732;41228795;41229879;41231931;41233550;41233674;41244491;41247232;41249869;41250644;41254741;41257309;41258661;41260316;41261588;41266407;41268099;41268922;41271277;41277117;41280220;41282459;41283722;412…
1419	6	67051519	67286115	78	102965	67051519;67063182;67063341;67068149;67069075;67069109;67072533;67072560;67077127;67077335;67077879;67078499;67079688;67088243;67090617;67091783;67093251;67095071;67095120;67095373;67098124;67098851;67099682;67103487;67103571;67103912;67104684;67104838;67105071;67105830;67107421;67110625;67115892;67119483;67120819;67121189;67123905;67124777;67126847;67129735;67131119;67131925;67136799;67142356;671…
1415	6	6802712	6896588	36	105098	6802712;6804328;6804782;6812031;6812305;6815302;6816248;6816739;6818446;6818779;6818842;6822921;6824307;6824407;6825361;6825560;6833987;6834319;6839678;6840228;6841522;6845744;6848952;6848971;6854766;6857660;6865509;6870445;6873434;6876143;6885607;6886168;6891315;6892411;6896491;6896588
1322	6	71890862	72408929	269	254229	71890862;71893462;71895373;71896010;71897163;71897309;71898363;71908558;71909978;71916536;71916620;71928769;71930120;71930896;71931490;71938429;71946501;71952720;71953987;71957354;71966344;71968866;71969649;71970273;71972425;71972792;71974568;71974694;71977720;71977806;71978168;71978511;71978731;71979135;71979188;71979519;71979739;71979875;71980326;71980406;71980589;71980612;71981709;71981728;719…
1323	6	106966094	107221324	73	247785	106966094;106966775;106984537;106992008;106992630;106994632;106997287;106997556;106998338;106998670;107001579;107004012;107011058;107011414;107021808;107024207;107024569;107029450;107033417;107042313;107043698;107045176;107048612;107051966;107066973;107070926;107080988;107084964;107086584;107089473;107091225;107094074;107102393;107104373;107107597;107107617;107109211;107112720;107115225;107115384…
1320	6	157706353	157875718	98	275230	157706353;157707198;157707752;157714545;157717847;157719184;157723521;157723767;157724567;157724876;157725094;157729427;157737246;157738743;157739931;157740095;157740793;157741763;157743287;157745707;157749557;157753278;157754678;157754987;157756117;157756155;157756578;157759527;157760498;157761171;157762030;157762173;157762450;157762639;157762843;157763181;157763497;157763817;157764109;157767530…
1321	6	105642329	105794797	68	254815	105642329;105642534;105645011;105646670;105650801;105652965;105656120;105664791;105665023;105665819;105665997;105669148;105669956;105671913;105674702;105676729;105676788;105679203;105680897;105682075;105683066;105687381;105688633;105693092;105693409;105694937;105695547;105697952;105698061;105698370;105699186;105699753;105705647;105708749;105710698;105710966;105712224;105713869;105715167;105719230…
1327	6	1990076	2435605	323	226134	1990076;1992734;2004737;2004805;2009988;2011310;2012489;2021499;2032171;2035679;2037615;2042987;2052894;2058128;2064860;2065949;2066046;2069584;2070189;2072733;2076940;2079715;2093511;2097242;2098061;2098807;2100526;2101682;2107275;2108387;2117830;2119208;2122355;2122457;2122657;2128223;2129253;2130858;2131116;2133041;2133207;2134171;2134539;2134655;2135126;2135529;2136069;2136185;2136389;2136432…
1324	6	89649214	89966775	116	237109	89649214;89652118;89655048;89655515;89659677;89666170;89669400;89670409;89674941;89676343;89678468;89678979;89679945;89682130;89689275;89689342;89699415;89700752;89703288;89717443;89718999;89720157;89726928;89727688;89728152;89730479;89731559;89735688;89735995;89737700;89754839;89758539;89761087;89761715;89766400;89767441;89768467;89769464;89775394;89776675;89780510;89784941;89790728;89792130;897…
1325	6	117116416	117857915	391	235051	117116416;117121066;117125377;117127214;117134195;117134636;117136025;117145407;117148249;117149066;117149835;117160415;117165034;117170678;117171707;117174024;117180629;117182087;117183026;117183861;117184336;117185341;117186709;117189646;117190771;117190996;117191599;117192089;117192117;117192392;117193530;117194777;117197919;117199839;117205285;117208523;117209509;117210255;117210839;117213471…
1329	6	25263977	25408104	98	222768	25263977;25267899;25280179;25285264;25285620;25286156;25289763;25290264;25290333;25291077;25291442;25291534;25291726;25292244;25293201;25293264;25294524;25294788;25295083;25295518;25296065;25297272;25298086;25298733;25300414;25300620;25300649;25300696;25300718;25300752;25301133;25301653;25302207;25302283;25302678;25303127;25303810;25304200;25304217;25304318;25304359;25304433;25304525;25304573;253…
5	10	72400789	73226769	294	375099	72400789;72408232;72408842;72413239;72413445;72415394;72416495;72417772;72420802;72421689;72422444;72422549;72424452;72424486;72424549;72425550;72425743;72425812;72426335;72426352;72426604;72426619;72426983;72427136;72427217;72428221;72428783;72431588;72434946;72436466;72437106;72437206;72440653;72440845;72441401;72444177;72444390;72445630;72451659;72452788;72452859;72453565;72453821;72454923;724…
1531	8	16793408	17269793	173	205539	16793408;16793736;16795157;16795342;16796669;16796774;16798143;16798317;16798590;16800480;16800703;16807678;16808752;16811048;16814287;16816092;16822735;16826151;16827952;16831373;16831749;16834712;16835064;16836151;16836166;16836295;16836558;16836619;16836931;16837079;16837268;16838941;16839011;16839170;16839195;16839403;16839634;16840697;16840799;16841217;16841497;16841652;16848329;16849053;168…
1256	5	9381999	9436818	37	142501	9381999;9386729;9389110;9391839;9394725;9398848;9401563;9401620;9402056;9402235;9403587;9403889;9404027;9404444;9405237;9405367;9405400;9405411;9406155;9406204;9406773;9407258;9407379;9407395;9407467;9407960;9411617;9414096;9416365;9416992;9419512;9420710;9423965;9425272;9429615;9434210;9436818
1252	5	53754546	53932952	60	144882	53754546;53763083;53767425;53771669;53773663;53774203;53775150;53775456;53779668;53794613;53797505;53800610;53800926;53801896;53804930;53817295;53822570;53823808;53826070;53826246;53828663;53829825;53830764;53831959;53832141;53833280;53834305;53835470;53841956;53849008;53856448;53856949;53862831;53864310;53867198;53874523;53876805;53878640;53882490;53882668;53890935;53892256;53894009;53895349;539…
1251	5	116469510	116716714	86	145607	116469510;116471779;116472038;116476014;116477467;116478722;116480820;116481178;116482007;116487965;116492406;116494807;116498328;116501336;116512705;116513090;116514235;116516960;116518496;116519566;116522957;116525898;116526031;116530453;116531396;116532558;116533310;116537433;116538353;116539479;116540779;116546258;116550675;116551223;116553210;116558660;116560270;116562346;116563195;116563554…
1528	8	29892910	30153051	100	220799	29892910;29895766;29895850;29902548;29904805;29914628;29916715;29917018;29920369;29920440;29933127;29937199;29942997;29944620;29946967;29948630;29957272;29958211;29958328;29959652;29962525;29966835;29968024;29979852;29980662;29984013;29985435;29990505;30001848;30004529;30005099;30007912;30013267;30015029;30015758;30015883;30017704;30018342;30022107;30023509;30027967;30029880;30033662;30037982;300…
1529	8	9044477	9240271	108	213150	9044477;9044734;9046405;9047360;9047810;9048074;9049102;9049250;9049495;9049614;9050278;9050770;9053410;9053717;9063158;9064162;9064983;9065300;9066235;9066399;9066595;9067223;9068398;9068447;9068546;9070006;9072130;9073954;9074320;9074960;9079685;9083957;9084148;9085615;9086619;9089032;9091356;9094505;9094868;9095084;9096444;9097748;9107446;9111380;9112308;9112788;9119115;9119405;9119434;9121039…
1259	5	113819791	114077193	124	138361	113819791;113820618;113824819;113826605;113831087;113832348;113832485;113838223;113839227;113843810;113844023;113849077;113849559;113849682;113852756;113852941;113855041;113856423;113856808;113857223;113858087;113860920;113861957;113863803;113864294;113864979;113868227;113869785;113873866;113874786;113877163;113877299;113877748;113878099;113879462;113883967;113890631;113894148;113898796;113901570…
309	13	30373028	30598799	92	172943	30373028;30376689;30376973;30381496;30389382;30391549;30398307;30398801;30400722;30405041;30411728;30412883;30413558;30415796;30417218;30419021;30420305;30427091;30427170;30434178;30436999;30442841;30444901;30447722;30449046;30449859;30455023;30459836;30460323;30464251;30465424;30475859;30479330;30481418;30481528;30486995;30490481;30490623;30492604;30492704;30496085;30496598;30498685;30498834;304…
302	13	85125736	85572932	146	196960	85125736;85127230;85131559;85136774;85136858;85141095;85146353;85159443;85162272;85167647;85170388;85171886;85177888;85180270;85185316;85186743;85195858;85198399;85201771;85206950;85212359;85214013;85216157;85220709;85221992;85222535;85225544;85225571;85226295;85238840;85240475;85244454;85245771;85249709;85250980;85251346;85254900;85259848;85260180;85260240;85261201;85262163;85265138;85265903;852…
303	13	38369688	38462756	74	193453	38369688;38371735;38372783;38372844;38373012;38373282;38373820;38374151;38375041;38376166;38377222;38379284;38382434;38382771;38384197;38384677;38386945;38388917;38392993;38393403;38393700;38395236;38397681;38398830;38406204;38406280;38406556;38407435;38410328;38412660;38414858;38414991;38416066;38417027;38419477;38420587;38422391;38427101;38427169;38428504;38429236;38430722;38431226;38434316;384…
305	13	39439730	39830628	145	189857	39439730;39443481;39451073;39455965;39456391;39467356;39472351;39474148;39478371;39487548;39503250;39506545;39511501;39513131;39513827;39515006;39515667;39515743;39515837;39516636;39516648;39517876;39518961;39520417;39524439;39528212;39528740;39535475;39538937;39545318;39546497;39553121;39556977;39571605;39572994;39573451;39573810;39583127;39584916;39591124;39592102;39603997;39613910;39627280;396…
307	13	73129928	73839550	171	181797	73129928;73130046;73130390;73131228;73131347;73131820;73132894;73133267;73134407;73134797;73145438;73156423;73157290;73158649;73160793;73161728;73166297;73184765;73200933;73202227;73205587;73208376;73211451;73215588;73215616;73216893;73217694;73219429;73219764;73220745;73221051;73222201;73222385;73223744;73223954;73224107;73224408;73224462;73226601;73228084;73232657;73235717;73235940;73237970;732…
1443	7	580136	1211663	151	237612	580136;597566;603073;617202;629457;633047;640108;641183;644368;645393;646759;650605;653222;653771;663647;668061;668598;670846;672623;673388;677101;677419;681631;685800;688219;690196;692928;692964;702827;702920;702969;703101;705564;707996;709119;709967;710866;718072;730963;731912;733764;735140;740470;745540;747393;754401;754895;764590;779211;779917;780155;780296;781754;785010;788633;788908;792512;…
959	2	31353816	31453008	40	113660	31353816;31354536;31354961;31355132;31355900;31356773;31357065;31358071;31359246;31359880;31360928;31364921;31368043;31372570;31373159;31378939;31380468;31382470;31387385;31388865;31391203;31393217;31396799;31398420;31399690;31400050;31403163;31405700;31406357;31409639;31414830;31416731;31422581;31435810;31441325;31447350;31447719;31449127;31449168;31453008
958	2	217858641	217923141	95	114108	217858641;217863508;217863912;217864545;217865301;217866032;217866302;217866815;217866897;217867396;217872312;217873294;217875139;217883304;217884675;217885344;217885358;217885529;217885812;217886277;217890240;217892280;217892296;217893359;217894390;217895191;217895293;217902971;217903115;217903169;217903378;217903615;217903709;217904020;217904064;217904241;217904790;217904873;217904908;217904955…
953	2	31648285	32258915	249	117089	31648285;31650738;31651601;31651644;31656363;31658063;31658453;31668303;31669967;31672627;31679950;31681500;31686407;31689770;31691055;31694853;31699956;31703728;31703953;31708302;31709440;31713062;31713745;31713952;31714545;31717270;31718047;31719601;31720213;31720709;31721304;31721896;31722760;31722937;31730024;31733264;31738553;31739353;31739559;31741439;31749993;31751042;31753720;31755046;317…
952	2	238990388	239440220	146	117610	238990388;238993833;238997561;238997725;239004473;239010577;239011262;239011274;239026249;239032305;239033095;239038330;239040708;239045196;239049024;239050356;239061655;239063874;239063935;239066389;239070789;239071813;239077851;239079542;239082903;239085145;239087551;239089255;239089684;239090042;239103805;239104267;239106280;239107138;239109389;239110035;239113126;239113336;239119484;239122917…
955	2	117822577	117982250	72	116198	117822577;117822589;117826345;117826766;117827837;117828078;117830718;117830873;117831808;117832878;117832953;117840887;117843300;117843765;117850689;117855431;117856027;117858932;117859061;117860896;117860989;117861583;117861853;117867054;117871027;117872524;117874594;117875236;117875313;117875353;117875999;117877042;117880169;117884804;117895346;117895440;117896591;117902234;117904412;117906080…
957	2	33736723	33904938	52	114306	33736723;33741292;33743979;33747537;33755281;33756750;33757468;33758348;33775208;33783081;33789837;33790761;33793555;33798768;33803626;33803740;33804452;33804788;33807749;33812113;33822699;33825276;33829175;33835417;33838107;33838234;33840814;33841901;33843412;33844534;33845815;33847938;33849840;33850794;33851729;33857014;33858417;33865984;33867863;33868569;33869724;33879836;33881364;33881986;338…
956	2	14338623	14592801	96	114523	14338623;14341698;14342749;14355869;14371216;14373371;14375570;14375724;14379405;14380834;14381430;14388239;14398710;14400023;14401633;14402004;14403302;14418224;14418370;14420924;14434490;14434557;14437061;14438532;14440131;14441090;14442075;14443565;14444035;14449447;14449882;14461813;14462236;14469164;14472616;14474090;14482070;14482639;14484136;14486341;14487785;14491074;14491320;14491354;144…
1442	7	33693807	33937209	84	264489	33693807;33705945;33708867;33713549;33717650;33726445;33731492;33731547;33740049;33741794;33751274;33753594;33758622;33758934;33759344;33763753;33764505;33765316;33766354;33767669;33768483;33769872;33778249;33780006;33783790;33787638;33795210;33795339;33796555;33797950;33799663;33800783;33808197;33808724;33811615;33814460;33815790;33817531;33819666;33820423;33821789;33824899;33828389;33835782;338…
666	1	182049498	182286210	131	185688	182049498;182052869;182052903;182054153;182054468;182056974;182057830;182057936;182059918;182061054;182061658;182064367;182067296;182067858;182073757;182074958;182078238;182083368;182087344;182087357;182088555;182092590;182092697;182096240;182111330;182112771;182117323;182123986;182124346;182125913;182127769;182129217;182129988;182131779;182133446;182134775;182135322;182138357;182138706;182139963…
1261	5	53211336	53355261	52	136551	53211336;53222880;53230180;53231424;53232742;53243240;53244037;53250255;53251335;53256492;53265460;53267878;53271266;53272591;53273820;53275974;53276143;53282318;53285204;53289175;53291738;53293928;53295278;53296813;53298757;53303550;53304446;53305047;53307005;53309370;53309619;53309741;53310296;53311772;53312102;53312241;53312692;53324560;53325035;53325603;53325991;53326820;53331310;53333663;533…
716	1	86876166	87035487	118	131245	86876166;86876366;86876570;86876591;86876700;86876715;86876999;86877009;86877554;86877573;86877673;86877846;86878374;86878453;86878555;86878614;86878883;86879190;86879214;86879354;86879422;86879523;86879708;86879854;86880154;86880200;86880704;86880716;86880762;86880780;86880854;86880938;86881020;86881077;86881325;86881603;86881704;86881832;86882202;86882326;86882908;86882949;86883226;86883427;868…
715	1	22145180	22284155	59	132067	22145180;22145213;22160654;22163210;22168276;22168845;22171466;22173144;22173677;22173736;22173990;22174518;22175774;22176462;22176769;22177316;22177366;22177755;22177878;22178991;22179036;22179244;22179451;22180723;22181322;22181895;22196254;22199982;22207065;22209192;22209827;22210765;22216442;22221910;22226919;22227751;22228841;22229832;22230964;22233593;22238165;22242312;22242820;22243881;222…
714	1	216701099	216936412	95	132506	216701099;216701650;216701851;216704000;216711634;216711864;216712209;216713012;216716495;216720786;216724215;216729434;216729693;216730387;216735056;216737203;216737861;216743264;216746320;216746509;216747212;216753601;216759535;216762192;216764636;216772483;216775860;216777982;216780709;216786354;216792186;216793319;216793953;216794258;216799913;216800063;216802679;216808512;216811291;216815082…
712	1	219836864	220446207	152	133482	219836864;219840274;219842654;219844649;219853914;219856477;219862262;219865595;219872389;219879083;219879861;219889557;219901216;219908670;219917170;219929836;219930095;219932773;219933247;219933998;219936977;219940687;219941669;219956076;219958542;219962183;219975168;219979683;219979770;219980310;219980968;219981124;219982829;219984586;219990177;220003115;220004148;220004836;220007078;220007160…
711	1	22350933	22631588	86	134598	22350933;22354274;22358055;22367222;22367292;22376947;22380012;22384097;22386064;22388891;22391600;22393449;22402113;22404178;22408106;22408465;22408777;22411135;22411159;22411351;22419759;22422554;22426009;22434386;22440925;22442983;22444490;22444810;22447148;22447523;22449452;22449952;22450471;22454979;22455499;22460515;22465160;22476954;22483912;22490209;22502829;22504514;22511922;22513275;225…
710	1	231362840	231474489	51	138459	231362840;231363598;231365818;231366640;231371499;231373142;231377427;231386054;231386165;231386598;231388330;231396009;231396212;231400691;231406847;231410474;231412257;231412397;231415711;231418636;231425868;231428031;231428400;231431617;231434015;231434522;231440957;231444542;231444987;231446998;231448752;231454201;231454225;231454453;231455165;231455268;231459504;231459815;231459902;231460929…
660	1	101856556	102014325	159	201544	101856556;101857788;101867058;101874381;101877193;101877269;101878704;101879537;101885657;101891797;101893793;101897192;101900514;101900657;101900788;101904166;101904916;101905600;101908639;101909023;101911309;101920426;101923860;101924719;101925456;101927417;101928502;101932978;101936239;101938042;101940279;101941628;101942049;101942952;101943875;101951586;101955570;101957079;101959989;101965685…
1067	3	24477861	24560982	33	106387	24477861;24481018;24481944;24488168;24489810;24492869;24493828;24494388;24499560;24499855;24500482;24501888;24502246;24502985;24504610;24505445;24507388;24509471;24513032;24514206;24514476;24518861;24520295;24521288;24524835;24525585;24527403;24531509;24538109;24540264;24541745;24555939;24560982
591	18	44563643	44939093	145	130907	44563643;44566976;44568978;44584834;44592604;44593607;44594591;44595059;44595647;44601571;44602265;44602334;44605468;44609238;44611809;44613700;44623987;44625922;44627106;44629206;44631191;44632538;44633240;44634314;44634904;44639293;44640149;44641296;44641399;44649944;44656874;44663341;44665963;44668996;44669128;44670308;44671720;44672999;44674948;44676389;44688283;44697340;44701678;44704468;447…
590	18	44009179	44133946	56	135448	44009179;44010379;44014436;44019245;44022574;44031650;44038206;44038683;44039073;44039434;44043004;44045347;44045966;44050772;44051430;44057011;44057673;44059421;44060808;44061100;44062479;44068386;44071772;44074614;44079190;44084698;44085741;44093176;44098079;44100470;44102725;44103290;44103392;44103844;44104437;44104650;44105000;44106295;44107857;44113795;44115825;44117027;44117093;44122948;441…
593	18	47754944	47960800	66	125434	47754944;47755011;47759116;47762927;47765679;47767117;47767239;47768491;47783602;47784074;47787046;47797192;47803737;47813078;47813990;47814361;47814446;47816654;47818628;47820068;47820431;47821799;47822998;47824667;47825684;47827552;47831558;47831904;47835487;47836255;47838630;47840257;47841643;47842660;47850064;47855301;47860059;47860539;47861884;47863374;47863445;47876910;47892299;47893257;478…
592	18	50231712	50547864	129	128529	50231712;50232503;50232913;50233783;50234077;50235670;50236531;50237366;50238280;50239933;50240488;50241419;50250791;50252290;50260085;50260118;50260422;50261011;50263953;50264615;50265458;50265702;50268426;50269115;50270008;50274653;50275150;50276873;50278854;50282198;50287511;50290234;50290506;50291947;50294357;50295177;50296103;50298796;50300074;50301391;50302526;50303544;50305729;50308393;503…
595	18	45691165	45844115	59	119485	45691165;45692987;45700426;45702042;45708386;45709470;45710525;45711009;45713343;45714317;45717723;45720273;45725263;45727559;45730438;45734069;45735965;45737065;45739818;45741059;45746237;45749493;45751472;45752607;45753750;45756604;45758392;45758616;45768947;45773593;45783844;45786220;45789816;45805183;45805997;45807665;45807990;45809205;45809472;45810228;45810289;45811264;45811400;45811487;458…
597	18	23499335	23799560	85	115922	23499335;23503282;23508870;23509228;23509631;23514103;23519117;23522386;23525406;23527229;23534769;23537853;23538786;23543184;23544262;23548681;23554225;23566132;23569791;23573593;23574483;23576889;23584094;23589860;23603121;23603216;23616619;23617686;23618370;23618776;23631811;23634344;23637111;23643459;23644428;23644740;23646087;23650932;23651328;23662105;23662871;23667750;23670935;23671136;236…
1089	4	56458332	57043239	212	406907	56458332;56459758;56460160;56462363;56465271;56466257;56466876;56466914;56475099;56475431;56477967;56478387;56480037;56481533;56494441;56496144;56496316;56496346;56496727;56498798;56506731;56513187;56516030;56516760;56523675;56526433;56526539;56528721;56528836;56530382;56531135;56531205;56532695;56532709;56533616;56533824;56534648;56535233;56537020;56538015;56538323;56539680;56542067;56548572;565…
1088	4	161309031	162240040	432	451201	161309031;161311351;161315222;161322393;161322448;161327753;161336810;161337386;161338615;161339457;161342564;161343303;161354853;161357386;161362339;161367521;161370657;161370912;161374494;161388025;161392518;161395256;161397316;161399898;161404003;161406254;161407887;161409577;161425064;161433132;161435369;161435436;161438288;161442269;161449580;161450054;161453363;161459888;161464812;161472909…
1403	6	104739931	104934537	76	112892	104739931;104741383;104741760;104741781;104741816;104743122;104743278;104743289;104743802;104744186;104744460;104744886;104746640;104754147;104754342;104754377;104754662;104754698;104754775;104754861;104754903;104755020;104755291;104771351;104772349;104783556;104791360;104793670;104794656;104796256;104796296;104804957;104807299;104807487;104811332;104812308;104812623;104814787;104819819;104821256…
1402	6	77913981	78631417	198	114043	77913981;77916471;77917347;77918109;77929495;77933041;77933757;77940128;77940222;77943055;77944005;77944652;77947949;77951420;77960369;77965711;77973911;77973938;77976825;77982818;77984468;77986462;77986479;77988659;77989153;77998423;78006300;78006498;78018913;78020414;78020836;78024902;78025654;78026917;78028458;78031037;78031634;78032793;78036900;78037154;78037218;78040732;78041340;78042362;780…
1407	6	43430383	43677471	70	109148	43430383;43440476;43441086;43444679;43444850;43445678;43446264;43448855;43449572;43450319;43451923;43451933;43452581;43452890;43453165;43453567;43455232;43455352;43456126;43456559;43457907;43459569;43459760;43467910;43469241;43471481;43471693;43474768;43476232;43478410;43485806;43488836;43495095;43511169;43511210;43516824;43523739;43526045;43530388;43544209;43544955;43564587;43579750;43581935;435…
1405	6	41626769	41979555	71	110330	41626769;41627043;41628380;41630274;41631486;41641096;41646312;41651485;41653402;41656511;41659754;41660097;41663996;41666292;41670726;41671578;41673067;41674424;41676269;41676452;41676499;41679691;41694773;41700858;41706835;41715126;41715638;41724356;41725864;41730897;41739819;41756828;41758226;41765797;41766894;41770471;41776623;41785789;41786687;41793303;41794235;41797163;41800269;41805321;418…
1546	8	134787664	134942516	62	166712	134787664;134788774;134791690;134792067;134801236;134803801;134804987;134806375;134809199;134811988;134822985;134825114;134827511;134827851;134831587;134833873;134835128;134836573;134836650;134836946;134840673;134844448;134847485;134847980;134848531;134850009;134851324;134854434;134859892;134860194;134860413;134860724;134865159;134866147;134871569;134877110;134880155;134884497;134888437;134889454…
1547	8	5227121	5367880	106	164806	5227121;5233409;5234550;5236580;5237772;5239576;5243901;5246441;5246520;5246647;5247274;5247611;5248156;5249482;5249612;5249755;5250086;5250688;5250829;5251431;5251738;5252300;5257446;5258838;5259615;5260858;5262121;5263116;5264463;5267135;5267309;5267351;5269677;5269802;5271245;5271977;5272097;5273438;5273518;5276633;5277121;5277779;5278507;5279606;5280301;5280452;5280823;5282263;5282290;5283014…
442	15	46158233	46224920	37	151533	46158233;46160498;46160942;46168831;46171263;46175041;46178808;46180417;46180597;46181541;46183449;46185400;46185985;46187347;46189495;46191781;46191816;46192087;46192596;46192762;46193058;46193145;46193410;46193586;46193967;46194141;46194197;46194449;46194852;46195435;46195995;46199199;46202908;46212016;46214263;46217755;46224920
440	15	97876038	98026321	76	157495	97876038;97876720;97877149;97878641;97879286;97882439;97887899;97890992;97892036;97894356;97894474;97897065;97900368;97900599;97903947;97904035;97905167;97906326;97906381;97907408;97909207;97909341;97913801;97916351;97916418;97918547;97926436;97930927;97941122;97950732;97970339;97971980;97976835;97977103;97977158;97979991;97980655;97985506;97988090;97989025;97991164;97991352;97991430;97992702;979…
38	10	24703440	24844984	71	168992	24703440;24707281;24709847;24717500;24717561;24719743;24723474;24723659;24724312;24725204;24727492;24732262;24732318;24733032;24733873;24735213;24737351;24737721;24739058;24742061;24744939;24746482;24748914;24749209;24749731;24750089;24750976;24751424;24751746;24751834;24752328;24752706;24753428;24754551;24755623;24755735;24758372;24758837;24759654;24762465;24764631;24765039;24765486;24765946;247…
31	10	24176755	24278459	68	184249	24176755;24176908;24178449;24181903;24185407;24185708;24186183;24186258;24190021;24192867;24193340;24198662;24198770;24198834;24198909;24200418;24200816;24200998;24201179;24203572;24204908;24205291;24205511;24206837;24208941;24208970;24209005;24209354;24209557;24210335;24210542;24210628;24210987;24211017;24211427;24211542;24212013;24212036;24212538;24212814;24214961;24215585;24217456;24218486;242…
30	10	86613371	87209918	183	185459	86613371;86614995;86617949;86620471;86620766;86623280;86625230;86629562;86631180;86632876;86635236;86637466;86651196;86655429;86658441;86658990;86659882;86662761;86663378;86667953;86670459;86671359;86671477;86671525;86671572;86672459;86681308;86683076;86685530;86686874;86690083;86690678;86692897;86697496;86701466;86701986;86704618;86715203;86720835;86724553;86730204;86730784;86733042;86733880;867…
36	10	122511606	122723074	80	171553	122511606;122513512;122514938;122515509;122517340;122517623;122520364;122522260;122524397;122524830;122525798;122526678;122529107;122531747;122532863;122532900;122537451;122538512;122538892;122542090;122542521;122543272;122543325;122544537;122544670;122548525;122553704;122561633;122566810;122569377;122573191;122578948;122587129;122588119;122589805;122597084;122599391;122603284;122607931;122621104…
35	10	27670099	28118105	131	174830	27670099;27670124;27671238;27673995;27674311;27674521;27677257;27678574;27681329;27685783;27692561;27693868;27694654;27698535;27700424;27700615;27706601;27706945;27707672;27708505;27708687;27710533;27715498;27718559;27719675;27721845;27733099;27735143;27738821;27739574;27740138;27743479;27744054;27747750;27748989;27751818;27753460;27755898;27756326;27760815;27761092;27766388;27767784;27768364;277…
643	1	208763856	208917719	146	299087	208763856;208764552;208764763;208767171;208770129;208772230;208772747;208772776;208774366;208774626;208774909;208774941;208775471;208776009;208776207;208777514;208780934;208781507;208783315;208785494;208786204;208786270;208786940;208787221;208788220;208788896;208788978;208789037;208789411;208789565;208789745;208790129;208790970;208793353;208793379;208794718;208795969;208796512;208798145;208798791…
642	1	46899177	47209798	120	302082	46899177;46899965;46900349;46900820;46902126;46902352;46902635;46903255;46904292;46905711;46907954;46908356;46908710;46908765;46911156;46912276;46912406;46912949;46914166;46914216;46915045;46915557;46916046;46930341;46938593;46938772;46940437;46948027;46948537;46954172;46957509;46957624;46962098;46973801;46983475;46983921;46987817;46988708;46988835;46989984;46995045;46996504;46996599;47008242;470…
645	1	115475877	116010315	165	288657	115475877;115476402;115477092;115477675;115478761;115481370;115485249;115490999;115493117;115495699;115503730;115508764;115509747;115513728;115514268;115521617;115525102;115525436;115530271;115537367;115538062;115542887;115550103;115554717;115564849;115568330;115569782;115575320;115579370;115580201;115583216;115586417;115587462;115589515;115590253;115590429;115592670;115596786;115608572;115610746…
649	1	199268579	199901100	210	258909	199268579;199270369;199274265;199286819;199289436;199294917;199297236;199300745;199305295;199312326;199312463;199312718;199314543;199314594;199320556;199331155;199332889;199335100;199336660;199338460;199341608;199353227;199353972;199354635;199357095;199359180;199359830;199362404;199366280;199368606;199372440;199373534;199378625;199379440;199386441;199389122;199392068;199399794;199402531;199407315…
1538	8	12577866	12898742	115	185250	12577866;12578672;12579228;12580949;12586264;12587329;12587862;12607186;12608577;12617476;12617633;12620609;12620753;12625656;12626159;12640058;12641640;12646047;12647146;12648459;12649328;12651041;12655317;12657539;12660686;12662070;12662343;12662562;12664593;12666269;12667128;12672630;12675044;12679548;12680117;12681561;12684867;12685027;12691524;12695169;12695628;12695682;12697133;12707301;127…
337	13	82044568	82210736	63	118556	82044568;82051593;82053729;82060321;82062327;82067975;82068932;82069571;82070254;82072224;82072843;82075216;82079241;82079954;82080406;82080816;82082074;82083614;82084591;82091189;82091271;82096016;82099310;82100017;82100438;82106675;82106899;82107532;82108932;82110094;82117331;82121387;82128163;82129266;82137476;82137849;82141870;82145329;82146822;82156214;82158310;82161098;82163844;82164194;821…
330	13	81581829	81661745	61	133014	81581829;81584656;81585800;81589331;81591699;81599000;81604547;81605469;81605666;81605676;81605826;81605963;81606317;81606999;81608306;81608499;81608623;81609823;81610204;81611469;81611628;81612092;81614629;81614702;81614751;81615645;81615777;81615787;81616618;81617407;81618386;81618730;81618804;81619143;81619200;81621239;81623664;81626550;81627403;81628011;81629432;81630527;81632291;81632647;816…
333	13	74678544	75083849	141	129332	74678544;74697578;74697668;74709976;74712545;74714025;74718946;74719428;74732917;74734253;74738644;74740461;74740771;74742900;74745347;74751225;74753241;74753540;74764746;74765300;74767528;74771001;74771215;74771747;74774333;74774926;74776681;74783432;74784339;74786396;74791831;74796673;74798177;74801114;74807426;74815927;74817826;74819594;74820252;74821051;74823626;74826152;74827503;74829328;748…
332	13	38464046	38643748	74	130903	38464046;38464332;38464345;38464602;38464842;38464936;38465156;38465235;38465613;38466373;38466749;38467934;38469616;38470541;38471054;38471955;38472061;38472661;38472966;38474711;38477225;38477242;38477359;38477668;38477716;38478406;38480384;38481149;38481207;38482546;38482819;38483383;38483699;38483842;38484743;38501939;38502731;38507554;38511248;38515460;38522661;38528572;38531977;38532949;385…
8	10	12405507	12752414	107	326611	12405507;12408036;12409612;12410974;12411114;12415424;12417680;12422233;12424353;12424486;12426461;12430490;12433163;12434351;12434844;12440673;12445430;12451299;12456855;12462911;12465834;12475900;12478214;12478534;12484257;12484726;12496203;12498473;12505868;12512997;12520916;12522873;12524018;12525326;12526028;12527968;12528100;12529656;12533944;12543720;12545612;12547780;12550440;12550548;125…
1353	6	133381176	133707602	123	164644	133381176;133382160;133382500;133391906;133397065;133411554;133429960;133438801;133441672;133444501;133454709;133457828;133459087;133459372;133460391;133460405;133460610;133461089;133461116;133462685;133464135;133464294;133467216;133467853;133468882;133469514;133470508;133470827;133471302;133471896;133473208;133473718;133473762;133473945;133474647;133475816;133476515;133476560;133477933;133479661…
1462	7	129220928	129684769	223	166108	129220928;129222103;129225287;129226679;129244618;129244666;129245319;129249507;129250624;129251007;129252726;129254987;129258227;129260518;129260803;129261095;129262158;129263069;129265155;129266377;129267164;129268271;129270152;129270703;129272339;129272617;129273972;129276912;129279333;129289557;129292290;129298080;129298676;129304415;129306458;129306814;129307637;129317972;129327705;129329144…
1352	6	157403251	157555504	73	164811	157403251;157404924;157409522;157414530;157418208;157418374;157418601;157419580;157419914;157420280;157420441;157420849;157420972;157421882;157422257;157422361;157426806;157427839;157428566;157431876;157432416;157437235;157440673;157442604;157443635;157447260;157448245;157455653;157457476;157459883;157461929;157463613;157463960;157467427;157469590;157470447;157472012;157478046;157484605;157484867…
948	2	241057171	241090148	51	121229	241057171;241058214;241058288;241058838;241058863;241059320;241059520;241059757;241059786;241059896;241060064;241060378;241060704;241061083;241061228;241061303;241061959;241062154;241063584;241063821;241064847;241065709;241066201;241066313;241067005;241067056;241067466;241068635;241068646;241069880;241069982;241070346;241070675;241070693;241070786;241071467;241071932;241071955;241071966;241072467…
949	2	240632655	240728232	38	120324	240632655;240633501;240636246;240642207;240649838;240650149;240651133;240662135;240662613;240665139;240666353;240666825;240671070;240673491;240673536;240674622;240678915;240679741;240681984;240682127;240684289;240685331;240689014;240689250;240689410;240689807;240692920;240696060;240699119;240700783;240701277;240702315;240703064;240703367;240704540;240709904;240723490;240728232
944	2	101663634	101862015	69	123326	101663634;101663857;101667488;101668299;101674082;101676478;101676581;101681175;101681484;101690360;101692051;101699785;101707043;101707702;101707797;101709524;101710512;101716316;101716535;101718654;101720391;101725248;101725699;101726961;101729204;101731365;101739753;101742053;101744043;101747227;101753367;101754432;101761257;101763687;101764513;101765561;101768965;101771573;101774794;101776324…
940	2	75630577	75696529	45	127827	75630577;75631146;75632253;75635772;75642020;75649676;75652863;75657219;75657932;75658211;75659306;75661499;75661526;75661811;75662431;75663268;75666297;75666745;75667006;75673264;75673299;75674648;75674698;75674883;75678387;75678651;75679369;75681474;75682345;75686372;75686942;75687160;75687434;75688630;75688681;75689098;75689797;75690023;75690414;75690436;75690465;75690490;75690813;75692135;756…
132	11	122801551	123000929	51	161324	122801551;122801678;122805487;122806714;122808105;122813171;122814156;122814993;122818021;122819322;122827391;122830663;122831833;122839370;122844507;122844876;122845286;122845353;122845535;122851237;122851583;122867629;122868268;122868936;122874756;122884326;122896991;122899373;122904036;122907579;122919222;122923456;122926165;122935517;122936377;122940886;122943802;122944769;122945278;122948124…
131	11	9121518	9578069	97	165250	9121518;9121571;9123704;9125475;9128127;9130469;9130629;9131094;9132143;9133407;9133745;9135803;9138030;9138530;9139598;9142917;9144518;9150564;9153522;9157783;9158228;9159739;9170847;9171206;9172456;9179203;9183334;9188525;9195337;9201955;9210799;9212106;9214621;9226514;9238611;9241750;9243422;9255356;9268930;9274647;9276864;9281828;9284688;9302616;9309579;9310114;9313895;9322873;9330338;9336140…
130	11	8347799	8488820	49	165439	8347799;8352444;8353935;8354578;8355473;8357978;8358101;8367147;8367476;8368585;8368947;8377960;8379948;8380188;8382808;8386062;8386103;8387326;8387382;8388146;8388766;8388951;8389053;8390285;8391622;8392316;8393833;8394189;8394365;8394378;8396622;8402290;8404597;8410850;8413933;8414813;8415471;8419055;8421831;8426318;8439829;8449649;8452366;8454637;8465590;8466245;8469497;8484598;8488820
135	11	83583732	83977990	222	154040	83583732;83596081;83596946;83597088;83602378;83602726;83604565;83606495;83610486;83614514;83623075;83632378;83633147;83634811;83635101;83635673;83647776;83649524;83649571;83650323;83650348;83650824;83651190;83651701;83651773;83652579;83652592;83652812;83653440;83653537;83653552;83653714;83653902;83654791;83654963;83655082;83655608;83655894;83656234;83656288;83656569;83657777;83657793;83657873;836…
134	11	118749653	118899150	44	158116	118749653;118751147;118753597;118753641;118753770;118753918;118755130;118755890;118755920;118756362;118759011;118763786;118765890;118766056;118770946;118786178;118791394;118791837;118792327;118794306;118798837;118809222;118814252;118825685;118834322;118845235;118847066;118848698;118855381;118860436;118864676;118864915;118879780;118881658;118883364;118885370;118887038;118892989;118894275;118897089…
700	1	80452720	80779808	124	143325	80452720;80455455;80456116;80456672;80461706;80472617;80476583;80478833;80479153;80485591;80491204;80491518;80492370;80494885;80497084;80498565;80507564;80518190;80520278;80521222;80522569;80523889;80526860;80530634;80532101;80537244;80538782;80540687;80546324;80550364;80553029;80558201;80567176;80567679;80568004;80573061;80573188;80573843;80576499;80577015;80579323;80585264;80585606;80585728;805…
701	1	217089102	217506931	140	142404	217089102;217094680;217096369;217099271;217101880;217104246;217110899;217117146;217122670;217124015;217131784;217132018;217132111;217136449;217137492;217148507;217154290;217154726;217157713;217159063;217160798;217160939;217161595;217164655;217165155;217165287;217167413;217170732;217171907;217173491;217174577;217175003;217177341;217182708;217183895;217184180;217184731;217185265;217185422;217186273…
703	1	200070056	200137135	38	141991	200070056;200076796;200079252;200079327;200085703;200086373;200086447;200091164;200091588;200092169;200092764;200094098;200100447;200100818;200102450;200112009;200112311;200115890;200117589;200118916;200119301;200119801;200120463;200120508;200121103;200122530;200123753;200124294;200125092;200125941;200126033;200126399;200126861;200127137;200127262;200127705;200127785;200137135
89	10	109966489	110315454	134	108630	109966489;109967187;109968893;109985488;109986550;109991761;109997517;110006732;110009122;110017332;110022169;110023259;110023501;110031344;110031587;110032249;110033345;110036866;110037104;110041243;110043964;110047020;110048586;110049068;110051633;110054352;110056321;110062757;110069446;110086137;110089328;110091148;110091273;110096036;110098144;110099683;110101667;110107580;110108124;110110284…
82	10	4007895	4108021	41	111595	4007895;4011083;4011133;4013542;4013780;4014062;4014218;4021270;4022085;4023041;4023207;4032981;4035789;4036699;4036734;4041203;4043046;4043569;4044831;4044841;4049104;4051440;4053579;4058890;4062011;4063986;4065762;4068881;4076073;4078748;4079878;4082966;4090200;4094089;4103226;4104019;4104226;4104856;4107131;4107471;4108021
83	10	73329809	73506129	65	111428	73329809;73345667;73345869;73345882;73346179;73346545;73346692;73347987;73359270;73359528;73360659;73364526;73366226;73370333;73372634;73373123;73380094;73382240;73386709;73390015;73390497;73391659;73392570;73405409;73412131;73413685;73414511;73429494;73434602;73438561;73442053;73445359;73445950;73448063;73452238;73452477;73454141;73459473;73461805;73477775;73481344;73483393;73494202;73494323;734…
80	10	132545132	132661714	46	112515	132545132;132546370;132546867;132548901;132549347;132549400;132549696;132549961;132550716;132552085;132552115;132553759;132554714;132556422;132556735;132566043;132576811;132577698;132578856;132579217;132579281;132582549;132583245;132585055;132585337;132585957;132587784;132590567;132591387;132591747;132592744;132604801;132606705;132608318;132609071;132611610;132612723;132630267;132630839;132632923…
87	10	5118322	5284557	93	109959	5118322;5118842;5121872;5122570;5124755;5126044;5129121;5133140;5134511;5138036;5144599;5151565;5152162;5152680;5157896;5160499;5162308;5168690;5180220;5196119;5196273;5199216;5206185;5207683;5213252;5214467;5217302;5218654;5218947;5220427;5221921;5221988;5234161;5234406;5238020;5238272;5239300;5239706;5239824;5239958;5241472;5245780;5246085;5246125;5247098;5247376;5247631;5247701;5247784;5251482…
84	10	133046624	133140353	39	111381	133046624;133051518;133060304;133061020;133061923;133064241;133064807;133065484;133066769;133066805;133070369;133071633;133071659;133072089;133072211;133072809;133073227;133074107;133077725;133082184;133082957;133085909;133086061;133086782;133087146;133089105;133092602;133097577;133099140;133102703;133103488;133104330;133114314;133116505;133119543;133120100;133121215;133122434;133140353
1652	9	130955377	131168363	48	117280	130955377;130972286;130972988;130973356;130974320;130974938;130990601;130995377;130995493;130995509;131004019;131008369;131019933;131029033;131030695;131037554;131039456;131042088;131051254;131055622;131066456;131067287;131067887;131072428;131073676;131077366;131083641;131085080;131088214;131098652;131102514;131112034;131112576;131120870;131121019;131124375;131124828;131126196;131126357;131132706…
1389	6	151931561	152095043	71	123224	151931561;151931802;151932289;151933097;151933425;151933849;151934436;151934846;151936316;151951069;151963635;151965474;151967047;151971160;151975061;151978106;151980776;151994255;151994522;152000791;152002105;152002183;152002296;152006621;152008442;152009427;152010546;152014746;152018139;152018498;152020716;152021571;152024178;152025566;152025786;152028755;152030712;152033377;152035234;152035299…
587	18	75244485	75393300	53	138061	75244485;75247237;75249919;75249960;75253024;75256451;75258001;75258752;75262530;75275927;75279917;75279978;75285932;75286386;75289324;75297248;75302821;75305424;75311109;75315265;75316567;75317680;75317995;75319035;75320808;75327677;75327961;75328198;75329822;75335092;75337489;75338178;75344460;75345257;75345415;75348041;75350327;75359018;75365036;75368512;75368715;75372132;75379348;75380474;753…
584	18	77172860	77290177	64	143769	77172860;77173038;77175357;77175867;77179746;77179833;77181489;77184282;77191247;77195813;77197555;77198370;77198934;77198964;77202786;77208141;77209180;77210152;77223322;77226973;77227950;77229409;77229738;77230822;77231307;77232698;77236259;77237142;77245489;77250197;77250669;77250679;77256102;77256325;77258793;77260507;77263169;77264132;77264481;77269128;77270453;77271669;77271819;77273862;772…
582	18	66511433	66738497	115	153566	66511433;66512722;66512762;66513174;66522254;66522766;66523951;66528954;66529888;66536333;66537726;66540338;66542362;66543606;66544963;66545166;66545480;66546139;66546240;66546533;66546545;66546770;66547412;66547777;66548250;66549011;66549356;66551133;66551260;66551578;66552155;66553578;66554107;66554905;66555927;66556770;66556886;66557701;66557956;66559136;66561157;66561220;66561258;66561371;665…
580	18	24340993	24443052	40	158744	24340993;24344261;24349295;24353455;24363800;24365795;24367429;24368983;24370027;24372040;24380916;24381350;24383004;24383145;24384147;24384663;24384924;24387234;24391404;24396584;24397886;24400874;24403171;24404223;24404970;24407846;24410985;24413877;24418874;24419908;24420289;24423723;24424912;24429169;24435095;24438540;24440249;24441786;24442392;24443052
581	18	12262395	12442138	51	157768	12262395;12276882;12284288;12285171;12288994;12291742;12298034;12299414;12300093;12301249;12303998;12306213;12309661;12314304;12315063;12316940;12318999;12326784;12333687;12336188;12347827;12348751;12355526;12356451;12360583;12362849;12363578;12364347;12371458;12372802;12376266;12376279;12376746;12394199;12398103;12399275;12402422;12407397;12411025;12412550;12415630;12416119;12416259;12422792;124…
589	18	72994508	73073093	54	136139	72994508;72995646;72995793;72998526;73002419;73008896;73009977;73014552;73015843;73022267;73025228;73029106;73029332;73033750;73035038;73039098;73040003;73040073;73043492;73044195;73044396;73044411;73044510;73044542;73044576;73044716;73045051;73048398;73051562;73055410;73056028;73059850;73059946;73061421;73062103;73062325;73063297;73063929;73064202;73064495;73064582;73065020;73065530;73065811;730…
1348	6	154729590	154909692	69	168150	154729590;154729717;154730199;154736656;154737137;154740785;154742000;154744266;154744365;154747206;154748222;154751750;154753191;154754502;154756791;154756978;154761246;154761469;154764424;154766734;154767519;154779959;154793358;154793736;154796045;154801153;154802975;154808957;154812365;154819178;154819993;154821033;154828120;154834367;154841909;154842063;154845379;154848949;154851933;154853510…
1436	7	24270864	24799918	205	324180	24270864;24277810;24280852;24286717;24287775;24290395;24293209;24308214;24321827;24322008;24322659;24326507;24326981;24327815;24327881;24330075;24330191;24330210;24330816;24333096;24336956;24338841;24343849;24346676;24353900;24367772;24373476;24376306;24378750;24381856;24391947;24397309;24398897;24402439;24407622;24407645;24411359;24412885;24422020;24422046;24423742;24425786;24426292;24428493;244…
1434	7	13034781	13348398	172	341966	13034781;13037128;13038550;13039936;13042140;13047084;13048315;13048390;13054769;13056351;13060011;13063289;13066082;13066909;13067174;13067826;13069746;13072386;13072736;13078727;13078834;13081840;13081894;13086152;13087332;13090800;13092088;13095520;13096950;13099426;13101961;13106145;13107208;13107820;13108539;13110558;13110824;13111730;13116200;13122980;13127863;13131943;13150244;13151122;131…
1435	7	3314596	4137198	392	336455	3314596;3317808;3317887;3318069;3320981;3323837;3326003;3327806;3333008;3334383;3346911;3348287;3348905;3355672;3365155;3366082;3367402;3368057;3368295;3368525;3369375;3373996;3375319;3375598;3377463;3378000;3381955;3383728;3384863;3388296;3390539;3390883;3408165;3410922;3411840;3412228;3412573;3415253;3416226;3416258;3418176;3418345;3418682;3420071;3422888;3423091;3423395;3423618;3423698;3424422…
1432	7	77123979	78388690	491	385051	77123979;77124097;77126485;77136517;77141207;77147423;77147457;77150178;77150537;77150834;77153035;77156318;77157790;77158632;77160529;77165367;77165384;77165980;77168179;77168548;77170739;77171734;77171977;77172450;77172883;77173206;77175568;77179188;77180000;77180035;77180690;77184400;77190151;77190998;77191534;77192171;77194499;77196931;77197217;77198167;77202168;77203513;77204085;77204336;772…
1430	7	19188888	19845620	356	390886	19188888;19190307;19190453;19190824;19190999;19192311;19192816;19193029;19193480;19194042;19194515;19196525;19196947;19197174;19197446;19199320;19200063;19200597;19200731;19201824;19203666;19203799;19204415;19208979;19210056;19213307;19213977;19216731;19217318;19217375;19218187;19218540;19220819;19224753;19227946;19228387;19230326;19230359;19230430;19230848;19232269;19235695;19235804;19237164;192…
1431	7	9283475	9751646	246	385993	9283475;9283742;9286738;9286953;9287008;9288727;9288879;9294743;9298485;9302994;9309421;9310261;9316073;9316337;9316815;9319006;9319400;9319943;9329451;9330626;9333633;9341896;9343281;9353892;9356359;9365426;9373548;9374567;9383582;9383791;9386793;9386979;9387580;9390908;9393032;9393968;9394794;9394944;9395084;9401182;9403361;9403944;9407281;9414838;9415518;9416463;9418774;9419879;9420257;9423040…
1438	7	52221159	53100699	374	315486	52221159;52223540;52223566;52225367;52225578;52225703;52226290;52228788;52231914;52232156;52237631;52240139;52244264;52257343;52259733;52270102;52276570;52278158;52279035;52279325;52279567;52282303;52293685;52302476;52304055;52304505;52306724;52309496;52309761;52312946;52314317;52314872;52330775;52333409;52337736;52338830;52341546;52359281;52361914;52362951;52363430;52364110;52365622;52369273;523…
1349	6	54476824	54775134	94	167465	54476824;54477953;54488715;54498232;54506320;54510596;54517977;54526409;54527804;54538146;54543256;54550985;54552297;54553932;54554307;54555388;54556281;54557445;54557996;54561128;54564540;54567388;54567774;54569686;54569956;54570158;54571540;54572200;54573212;54574895;54575452;54576570;54578244;54582453;54583073;54586394;54594355;54594854;54594973;54595352;54602352;54612677;54615043;54622250;546…
1541	8	18076282	18209991	63	174747	18076282;18076731;18076751;18076832;18077045;18077202;18077320;18077499;18077576;18077646;18078009;18078171;18078357;18079124;18079213;18079517;18080001;18080015;18080196;18080833;18080901;18080933;18081344;18081391;18081518;18081991;18082117;18082220;18082275;18082405;18082467;18083808;18085881;18095166;18096337;18097233;18101830;18103916;18107244;18109850;18114437;18120225;18122965;18123270;181…
458	15	39569335	39628866	44	119588	39569335;39570749;39572278;39577925;39578897;39580395;39581188;39585383;39585689;39585974;39586152;39586354;39586457;39588317;39588972;39589195;39589738;39591148;39591344;39591957;39592002;39592155;39592271;39592538;39592554;39592695;39592739;39594628;39596574;39598394;39599878;39600386;39604137;39610675;39611354;39612580;39613238;39616189;39616715;39617262;39620866;39624725;39627097;39628866
459	15	80056927	80238518	48	116341	80056927;80062255;80067154;80067438;80082140;80085140;80085417;80090081;80097102;80097754;80098438;80098537;80098680;80106321;80112326;80113076;80119306;80122204;80123284;80123696;80125480;80128277;80128696;80133307;80135279;80139361;80139549;80141124;80153992;80162326;80163006;80173783;80174366;80181310;80181735;80181970;80185012;80186943;80201568;80202743;80210801;80214879;80215146;80216199;802…
451	15	53702163	53769650	46	133379	53702163;53702671;53704507;53708807;53709377;53711981;53715159;53716303;53716316;53716831;53717054;53719051;53719702;53721456;53721548;53723126;53724180;53724235;53724444;53725349;53725861;53726019;53729301;53729387;53729853;53730660;53731145;53733872;53735556;53742374;53742465;53743342;53743934;53746251;53746266;53749741;53752718;53754419;53758579;53759984;53763770;53765083;53767620;53768624;537…
454	15	36426743	36580346	64	125586	36426743;36427392;36427606;36427619;36434129;36438704;36441361;36441745;36442280;36443243;36443899;36449777;36454084;36455365;36455545;36456292;36457108;36463410;36464301;36465159;36469136;36472052;36477018;36484877;36486023;36490488;36497334;36502842;36504854;36510083;36510175;36511001;36511493;36515880;36530783;36539770;36541640;36545272;36546120;36549497;36550118;36554424;36556831;36556957;365…
457	15	55347794	55504262	59	120368	55347794;55349778;55350734;55353447;55354407;55354836;55355086;55356251;55356324;55356496;55356635;55356803;55357572;55363879;55364293;55365271;55365596;55372481;55375186;55375409;55376227;55377478;55379391;55396395;55400941;55407008;55408791;55417565;55419348;55424234;55429349;55431453;55433237;55433344;55435501;55441847;55443118;55444088;55449788;55456925;55457901;55463144;55464109;55464595;554…
1266	5	94844620	95107493	68	127275	94844620;94851537;94857470;94860329;94868172;94875925;94878227;94881662;94885205;94888232;94890096;94891260;94896385;94904739;94907396;94913843;94915670;94915753;94919276;94920786;94927020;94928488;94930897;94936015;94939173;94942953;94943161;94950656;94955391;94955450;94961882;94962422;94963891;94966293;94970909;94972466;94980091;94981907;94987445;94995120;95000325;95000962;95001025;95002773;950…
656	1	204872032	204971109	53	214247	204872032;204873034;204876143;204878029;204881651;204882085;204882232;204886413;204888648;204888827;204890129;204890354;204890792;204896319;204906954;204910816;204911506;204913806;204919399;204919456;204921706;204927037;204930904;204936878;204940787;204941512;204942697;204942839;204944268;204944441;204944454;204944536;204945814;204946300;204946393;204949157;204950798;204952335;204952378;204952541…
657	1	9512229	9704296	59	210175	9512229;9512341;9512992;9513625;9515142;9515601;9516135;9516982;9520449;9522684;9523062;9524627;9526214;9527335;9528305;9528582;9529302;9534210;9535408;9555198;9558688;9561303;9561554;9561823;9573096;9578023;9579945;9584991;9585344;9589715;9595072;9595157;9600146;9600743;9600787;9604605;9605412;9609303;9611399;9614506;9619011;9622525;9628540;9636354;9643465;9652041;9653861;9656575;9657532;9660142…
651	1	197976528	198771976	264	245910	197976528;197994234;197998284;198009357;198012658;198016014;198017975;198018714;198028154;198029783;198030095;198034530;198037829;198039244;198042463;198043245;198045472;198045663;198047780;198047838;198049417;198056800;198060493;198065244;198067437;198077999;198079131;198082913;198085299;198086178;198086512;198087508;198088258;198088447;198088740;198089682;198090405;198090760;198091281;198091653…
1508	7	41854625	41976021	57	104506	41854625;41856833;41857094;41857244;41859962;41861289;41862347;41863232;41865600;41866239;41867972;41868632;41869008;41869385;41872569;41873989;41874999;41884906;41885009;41885246;41889291;41892237;41892324;41895048;41895225;41895351;41900596;41903114;41904883;41905486;41912666;41914347;41920021;41922092;41922264;41924215;41926550;41928627;41929570;41930084;41930697;41932945;41934464;41942240;419…
1509	7	10965531	11236571	79	104214	10965531;10967105;10969205;10977359;10982164;10983328;10983701;10987156;10987379;10987512;10989348;11001761;11005599;11006226;11009479;11013107;11015780;11016823;11019708;11020135;11031081;11034688;11035485;11040482;11051375;11051790;11052679;11052945;11055804;11056392;11061177;11068135;11075873;11076514;11077251;11078498;11078528;11079114;11079666;11080105;11082439;11092622;11095789;11106833;111…
658	1	42105023	42503580	123	205892	42105023;42107750;42110135;42111275;42113441;42113910;42117810;42122037;42124161;42124614;42125759;42127067;42129781;42138673;42139805;42140350;42144399;42160214;42161757;42163665;42163875;42168052;42178833;42181451;42182800;42183771;42185152;42185376;42192748;42192847;42197600;42200975;42203524;42206344;42206583;42206827;42207583;42209325;42211744;42217412;42223847;42227236;42227527;42230043;422…
516	16	82557019	82641443	43	116335	82557019;82559376;82561130;82565015;82566792;82567743;82569764;82570065;82572804;82578068;82578623;82582462;82585655;82588748;82588881;82589368;82589697;82590083;82592775;82593015;82593093;82593308;82596336;82596653;82599255;82601057;82601097;82606758;82607353;82607529;82610544;82610777;82610945;82613848;82616750;82617560;82618788;82619018;82620492;82625047;82627911;82629245;82641443
321	13	72780814	72959325	56	150180	72780814;72785730;72787450;72791073;72791136;72794167;72799019;72806026;72806075;72815967;72821703;72825225;72825461;72825880;72826861;72830613;72839581;72840127;72846979;72847562;72851377;72852509;72852704;72853254;72857556;72859472;72862495;72866830;72868739;72873969;72876098;72888156;72890947;72891860;72898970;72903585;72904563;72904632;72905006;72905911;72908375;72909739;72910287;72911071;729…
327	13	108023187	108189877	82	139935	108023187;108023432;108023469;108024568;108029459;108031200;108033978;108039138;108040889;108041245;108041884;108042182;108043113;108047722;108050187;108053122;108053893;108054106;108055265;108056945;108057191;108057868;108058440;108059575;108059639;108060326;108060532;108060554;108060907;108061389;108066841;108073682;108076772;108080035;108081175;108087530;108090754;108091315;108094608;108095469…
324	13	28896193	29127954	68	144273	28896193;28896979;28900562;28901169;28908612;28908809;28909091;28910740;28912453;28914564;28921860;28924239;28924462;28924493;28924735;28926514;28940340;28940888;28945787;28947073;28948046;28949447;28953285;28953650;28954290;28962942;28964198;28970718;28972743;28979480;28982305;28997886;29003001;29005694;29010486;29011950;29012114;29013452;29022336;29023288;29027530;29027540;29030190;29034267;290…
325	13	25807589	25964901	50	143775	25807589;25810913;25813710;25813927;25818900;25820752;25825591;25828007;25830203;25830517;25836263;25836948;25840475;25848029;25853958;25855054;25857262;25866789;25867996;25868105;25869118;25871958;25872712;25874008;25875094;25875879;25878420;25890263;25893604;25893904;25893940;25894114;25897074;25903752;25913665;25914221;25915014;25927544;25928148;25929609;25940695;25942600;25942684;25942773;259…
328	13	89233825	89799090	260	137105	89233825;89234306;89234462;89234581;89234808;89234844;89235433;89240586;89240916;89242698;89244912;89245148;89248090;89250281;89250533;89262384;89273324;89273647;89274237;89274843;89275572;89276583;89281556;89282214;89283296;89284713;89288375;89289723;89290096;89290243;89290702;89291359;89292308;89292342;89293686;89293715;89294265;89296551;89297480;89298450;89300962;89308680;89309998;89317638;893…
329	13	74446471	74644353	65	134287	74446471;74450444;74452817;74453465;74454366;74454776;74455393;74462826;74467846;74470919;74471277;74472939;74473096;74474321;74480050;74480345;74482009;74485224;74486710;74492633;74498481;74508043;74508882;74508922;74510310;74513170;74513180;74513280;74516103;74520681;74520982;74530073;74530585;74537189;74537226;74539716;74539963;74542717;74550627;74555934;74558237;74561143;74561642;74564260;745…
1340	6	74764733	75289753	207	190361	74764733;74766275;74767776;74770191;74771643;74771893;74772079;74773211;74773881;74774211;74774645;74775260;74775621;74775745;74775904;74776402;74776597;74776807;74776844;74776963;74776993;74777008;74777230;74777790;74786415;74787799;74791900;74796329;74799691;74802113;74802432;74803193;74815462;74816290;74817843;74824157;74827820;74828165;74835346;74838268;74841990;74847481;74858552;74864851;748…
995	3	189569139	189829288	85	240078	189569139;189569669;189571205;189579586;189583529;189589697;189592247;189592565;189595405;189605290;189608812;189610701;189611137;189615687;189615936;189620162;189631790;189634566;189637701;189637812;189638493;189641002;189641430;189648497;189649105;189653319;189663460;189668023;189668819;189672991;189677729;189678010;189678835;189680782;189685683;189694056;189694958;189695016;189699068;189701457…
997	3	194823832	195189318	186	229318	194823832;194824294;194825402;194832679;194834566;194836549;194836786;194837556;194839580;194840205;194840338;194840743;194841524;194842068;194842571;194842876;194844912;194847039;194850978;194851463;194852473;194854762;194865416;194867160;194867204;194874155;194874939;194877355;194878130;194881154;194881716;194883267;194886975;194893213;194905937;194911839;194914558;194915694;194916649;194917439…
996	3	29329373	30266909	362	233264	29329373;29330385;29330556;29335516;29336947;29337766;29338263;29342630;29348526;29354883;29355952;29361791;29363069;29367705;29368432;29368471;29369360;29369593;29370534;29372157;29373721;29375752;29393836;29396364;29398950;29403978;29407791;29410569;29413352;29413847;29416098;29428965;29440219;29449501;29453045;29462872;29463000;29467317;29480446;29483069;29483932;29484110;29485969;29487512;294…
991	3	7696059	7816951	88	270409	7696059;7696219;7696230;7696446;7696943;7696999;7697171;7697496;7697535;7697811;7697870;7698299;7698829;7699058;7699083;7699143;7699155;7700105;7700759;7701005;7701301;7702050;7705623;7711179;7714845;7714971;7716841;7718362;7721174;7722432;7725064;7730596;7730719;7730860;7732476;7734596;7735418;7737416;7741769;7742843;7744694;7745591;7745701;7746096;7746801;7746871;7746882;7747145;7747609;7747871…
993	3	23796598	24034542	119	243497	23796598;23799254;23810877;23814705;23814893;23825101;23825413;23829805;23830353;23831347;23837834;23840331;23842231;23843260;23844137;23844680;23845273;23850120;23853322;23856329;23856734;23856819;23858216;23858687;23859210;23859369;23860021;23860092;23860302;23860705;23860761;23861353;23861381;23863254;23864519;23865095;23868014;23869105;23869889;23872639;23873901;23874229;23876423;23877141;238…
992	3	64937427	65153515	117	253377	64937427;64939917;64941938;64942902;64944578;64949535;64953056;64954863;64957833;64960229;64962112;64962358;64962763;64964334;64964750;64967172;64968750;64975165;64976018;64977674;64980342;64985368;64985847;64990564;64991341;64992844;64994542;65000572;65003777;65004378;65004977;65006053;65006219;65006486;65009078;65011549;65017988;65019712;65019733;65020104;65020149;65022111;65029385;65031330;650…
999	3	45176178	45302541	84	211414	45176178;45178292;45178457;45179736;45180951;45183156;45184464;45185268;45196521;45196757;45198141;45198538;45200960;45201595;45208659;45217947;45220697;45222577;45226311;45237237;45237853;45238109;45239344;45239892;45242015;45243455;45243638;45243809;45244223;45244440;45244845;45244954;45245010;45245029;45245247;45245603;45245627;45245681;45245997;45246030;45248874;45249409;45249958;45250010;452…
120	11	36487829	36868626	141	194022	36487829;36493700;36494302;36498050;36500225;36501948;36505315;36509566;36514245;36515292;36516822;36525128;36526542;36526989;36534185;36539430;36542906;36543394;36555372;36555901;36556414;36557507;36560243;36561431;36563154;36564011;36579420;36593164;36594460;36599964;36604100;36604333;36608272;36609471;36611804;36612306;36616750;36617147;36617268;36617304;36619467;36626582;36630367;36634268;366…
121	11	19619802	19729828	57	189382	19619802;19621223;19621555;19624243;19625547;19628353;19629658;19631191;19631255;19635248;19642236;19643392;19645669;19645728;19645742;19646455;19647500;19647913;19649741;19651242;19652896;19655016;19661628;19662100;19662567;19663136;19664358;19665338;19665569;19668211;19669402;19673368;19675914;19676373;19677868;19680003;19682438;19686886;19689393;19690812;19695869;19696397;19696611;19697385;196…
122	11	134351260	134719467	123	185988	134351260;134357710;134359886;134371231;134372938;134373319;134380480;134383046;134386423;134386905;134389902;134391420;134392536;134396888;134398890;134409317;134414864;134415578;134416897;134420804;134421045;134421292;134422507;134426265;134427088;134442104;134447602;134450267;134454235;134457975;134459608;134461226;134462426;134477893;134484992;134485782;134494968;134500536;134502041;134505510…
124	11	35549967	35842051	100	183726	35549967;35550631;35550650;35560918;35562378;35563959;35568803;35569576;35571661;35572139;35581450;35582240;35586946;35587785;35590287;35592566;35593088;35593985;35594321;35594759;35595082;35595137;35599296;35605342;35612356;35614978;35618591;35621726;35627622;35627741;35628674;35630546;35634515;35634697;35644781;35647588;35650249;35650374;35654719;35660778;35663641;35664618;35665479;35667745;356…
126	11	117407435	117544907	55	174677	117407435;117417384;117418077;117420369;117425169;117426035;117430025;117434985;117438093;117440220;117441703;117443368;117444884;117446003;117447735;117450936;117455203;117463436;117466661;117470795;117474492;117477867;117481112;117483022;117483626;117484221;117488010;117488030;117490095;117492693;117493342;117493839;117495305;117496666;117496750;117497996;117498314;117498656;117498920;117499828…
127	11	32067829	32214429	63	174484	32067829;32068996;32070130;32070948;32074118;32076253;32078251;32078380;32080627;32081264;32083089;32084633;32084759;32084822;32084857;32085071;32085311;32086921;32087220;32088048;32088113;32088370;32088444;32088730;32090031;32091133;32091218;32091988;32092188;32098081;32107675;32115062;32117441;32123346;32127449;32131935;32131973;32132439;32134488;32136360;32137207;32143316;32144326;32149991;321…
128	11	119939843	120073138	86	170289	119939843;119957520;119969313;119980837;119989763;119989956;119989984;119993056;119993995;119995287;119995668;119999275;120004008;120006146;120007188;120013544;120015992;120016247;120016529;120020728;120025974;120027859;120029519;120030526;120031094;120031916;120031943;120032252;120032450;120032801;120033295;120033745;120034168;120034234;120034316;120034608;120034751;120035811;120035863;120035910…
579	18	76552041	76756587	78	175622	76552041;76556630;76557297;76557336;76558056;76561629;76563971;76564695;76565970;76565983;76566129;76569646;76573309;76576082;76576860;76586408;76588469;76588901;76589761;76598501;76602609;76604841;76607837;76609227;76613654;76617694;76619683;76620092;76622807;76622878;76623316;76624709;76624981;76625517;76629698;76631860;76633680;76634181;76635233;76638002;76638121;76638771;76647019;76650021;766…
578	18	48338473	48785638	163	191967	48338473;48338657;48342045;48344922;48345640;48346026;48346220;48346486;48347565;48348594;48349433;48351935;48353951;48355028;48355564;48357917;48359612;48359740;48360030;48360571;48362787;48363715;48366213;48369447;48371692;48373639;48374855;48383259;48388968;48389215;48398265;48400174;48407673;48409743;48418085;48418768;48419097;48420080;48422361;48422717;48429705;48431780;48434220;48434890;484…
573	18	8848947	9330229	148	226458	8848947;8850180;8851032;8853825;8857153;8858808;8861618;8861815;8863584;8863879;8866740;8866936;8867544;8868937;8869089;8871187;8874015;8874958;8876131;8882703;8882761;8882895;8885627;8887468;8888333;8888528;8888860;8889838;8890011;8893015;8895530;8901428;8902151;8903953;8905693;8910125;8917541;8918941;8920609;8920892;8923092;8927089;8935461;8935484;8938785;8942870;8943600;8950995;8954220;8954362…
570	18	7860307	8169825	135	296542	7860307;7860483;7860911;7863429;7881822;7888082;7890951;7892834;7894715;7896722;7898679;7898946;7899168;7900130;7900408;7901663;7901711;7902331;7903168;7903297;7903713;7904186;7904344;7905945;7906458;7908340;7910940;7911024;7913901;7919300;7919997;7921996;7923620;7924459;7924472;7925614;7928650;7928792;7934268;7936217;7937166;7937600;7937859;7938201;7938320;7944844;7953916;7957471;7957960;7960385…
577	18	54417316	54753112	147	192206	54417316;54417390;54417602;54420766;54421793;54422555;54422900;54423590;54426007;54426484;54428278;54429838;54431745;54432049;54433129;54434463;54435140;54435752;54436990;54437116;54437133;54437191;54438217;54441445;54444704;54446055;54449201;54450098;54451493;54454235;54458144;54459280;54461023;54463460;54464301;54465236;54466362;54466518;54466956;54467939;54473863;54477107;54477174;54477468;544…
576	18	4222421	4341199	56	204815	4222421;4223415;4229115;4229961;4230066;4230912;4231102;4232414;4233324;4234587;4237243;4237383;4239790;4240989;4241523;4241810;4241930;4242680;4243661;4243760;4244544;4244814;4244929;4245170;4245602;4245723;4245973;4246079;4247881;4252944;4259312;4259596;4261078;4262447;4263306;4264364;4264459;4266953;4267553;4269863;4270659;4272539;4278150;4285864;4294649;4297550;4297824;4301572;4301618;4309177…
575	18	73209053	73330073	72	206730	73209053;73210557;73211173;73212289;73213547;73217632;73220079;73225590;73226124;73228590;73230997;73231666;73234587;73235194;73235381;73235659;73236069;73236289;73236443;73236534;73236614;73237379;73237389;73237514;73237686;73237698;73238410;73239662;73240249;73240854;73245566;73252019;73254532;73256255;73261415;73262143;73262251;73262659;73266456;73268024;73268253;73269340;73273874;73274088;732…
574	18	75475544	75611725	90	212236	75475544;75476200;75479820;75483657;75483886;75483947;75484279;75484755;75487562;75491309;75493610;75495536;75495760;75497690;75505509;75506482;75506541;75506769;75508135;75509287;75510215;75514761;75514903;75515501;75515649;75516583;75518470;75520974;75523565;75524010;75524531;75525138;75525314;75525479;75526190;75527615;75530186;75530857;75531106;75532379;75533516;75533647;75534173;75534339;755…
1422	6	124666934	124805013	38	101666	124666934;124668135;124670071;124670168;124670498;124670519;124673819;124675534;124677856;124681790;124683043;124683517;124692475;124696306;124697751;124697906;124698652;124701377;124701473;124706805;124708310;124709639;124711421;124711455;124712715;124720290;124721055;124723305;124723777;124733302;124743961;124757687;124766149;124770016;124779959;124794059;124800800;124805013
1424	6	73564114	73651911	41	100755	73564114;73566410;73566645;73567970;73568611;73572827;73573109;73590316;73596220;73597708;73597861;73601501;73601873;73604380;73605348;73607647;73608241;73608693;73609366;73612655;73613266;73614063;73617289;73619434;73619479;73619516;73620060;73622334;73623853;73625535;73630820;73631967;73633660;73633844;73641006;73641039;73647642;73650094;73650787;73651590;73651911
1426	6	138024026	138115791	40	100081	138024026;138024410;138028713;138033596;138033677;138037108;138039111;138041601;138042717;138044558;138044587;138045821;138046026;138047420;138047534;138048543;138050673;138056791;138060259;138066332;138072226;138072259;138074474;138075523;138079076;138079579;138082669;138090702;138092391;138093265;138093539;138098302;138099930;138101685;138103912;138104234;138107143;138115048;138115183;138115791
1429	7	21065218	21392093	143	410882	21065218;21072068;21072529;21072773;21075432;21076635;21078706;21079443;21080439;21083081;21085035;21085789;21091026;21091370;21092439;21094612;21098041;21099461;21113591;21117759;21119733;21123759;21126400;21128256;21136120;21138881;21142243;21142982;21144455;21145277;21150007;21154493;21154645;21162516;21162839;21163053;21164343;21166006;21166693;21169521;21170369;21171431;21172598;21173000;211…
731	1	164067554	164226591	72	123468	164067554;164069804;164070294;164071103;164074319;164075866;164080254;164083427;164086318;164087554;164087704;164094393;164094597;164099472;164103441;164104134;164105813;164105824;164106571;164106685;164112680;164113164;164113633;164115229;164115246;164115506;164116025;164116212;164116958;164119809;164128673;164132272;164142589;164144207;164144584;164144685;164149102;164154511;164156019;164158911…
732	1	37958339	38102679	59	122229	37958339;37958573;37962756;37969794;37971433;37976617;37976778;37976952;37977753;37978999;37986651;37992202;37992330;37993460;38002251;38010243;38011997;38014838;38015757;38023822;38025897;38026600;38029269;38030609;38031105;38031798;38032081;38032164;38033217;38036272;38042848;38043640;38046027;38046154;38047062;38047226;38048673;38053458;38058597;38069978;38074607;38074639;38078958;38080065;380…
735	1	34251754	34371256	33	120064	34251754;34252019;34253041;34253141;34257817;34259255;34264478;34264879;34265969;34275516;34277722;34278562;34279742;34288232;34291781;34304477;34322237;34326062;34330067;34331390;34332299;34332933;34342339;34346361;34348807;34349815;34351001;34359858;34360230;34362665;34363480;34366896;34371256
738	1	175113184	175268071	168	118994	175113184;175113578;175115048;175120315;175121962;175122566;175130276;175133242;175141050;175145000;175148459;175151124;175156808;175164763;175166106;175166799;175170253;175171701;175176492;175176628;175181237;175184890;175185489;175186917;175188519;175190082;175195877;175197802;175199495;175205763;175210111;175212856;175213737;175216308;175217395;175223218;175224784;175225079;175225399;175225953…
1358	6	134586541	134715603	44	157716	134586541;134602563;134602955;134604234;134610398;134616191;134627090;134629687;134631091;134631474;134637471;134640332;134640712;134645909;134648345;134657387;134658684;134659286;134664710;134666401;134667434;134667685;134668034;134668887;134669007;134669964;134671387;134673100;134677053;134680740;134681341;134683691;134688635;134691954;134695821;134695896;134697910;134702544;134704263;134704285…
469	15	56890524	57497961	159	102621	56890524;56891361;56892413;56894152;56903990;56918776;56923505;56925304;56934345;56938354;56942542;56943105;56943142;56945018;56952017;56956181;56957179;56959999;56968627;56974313;56978853;56983189;56989905;57007155;57007230;57026281;57028915;57034448;57040276;57044735;57053419;57065649;57066918;57074541;57076817;57077607;57080523;57083174;57089279;57091184;57092342;57099116;57099626;57100294;571…
467	15	35743033	35944483	80	104469	35743033;35745190;35752642;35756126;35763708;35763918;35765941;35767935;35774890;35778026;35779142;35779861;35782544;35783001;35783250;35784633;35784851;35785167;35786153;35787283;35789400;35795430;35795489;35796415;35796824;35797581;35798133;35800839;35801736;35808132;35808643;35811772;35815050;35818585;35819442;35820722;35821279;35823050;35823595;35829221;35830302;35830805;35831806;35833530;358…
1514	7	41076615	41161525	37	101035	41076615;41077781;41078043;41078131;41084017;41086119;41086500;41086890;41087156;41089888;41092785;41092816;41093191;41100897;41102892;41103334;41104647;41107028;41107244;41111405;41116984;41119517;41120374;41121823;41122764;41124937;41130641;41131310;41139807;41146433;41147225;41149228;41152893;41154697;41158937;41159793;41161525
1517	8	14571934	15271944	309	441398	14571934;14573203;14579343;14579958;14580443;14586459;14588179;14592840;14594308;14596337;14597252;14597963;14598120;14599360;14599374;14599838;14600561;14600916;14606684;14607749;14608551;14608886;14611160;14612881;14613037;14614701;14617297;14618494;14618908;14624502;14624745;14625809;14626332;14628186;14629801;14630684;14631951;14633180;14634397;14634826;14636347;14638434;14638921;14640650;146…
1516	8	20192750	21208776	468	611572	20192750;20193104;20201649;20201884;20203010;20204058;20204414;20207181;20209693;20213213;20213453;20215574;20217928;20219778;20219882;20220610;20222556;20228521;20229700;20231621;20232578;20234457;20236021;20237053;20237332;20237543;20239811;20239896;20243579;20243626;20243647;20243979;20244415;20244501;20245249;20246667;20246758;20246845;20247313;20253671;20253999;20262321;20262404;20263408;202…
1510	7	147493815	147610747	101	103672	147493815;147495351;147495362;147495487;147495527;147496324;147496714;147497199;147499552;147500584;147500833;147504696;147504936;147506079;147506988;147512871;147517257;147518944;147522188;147522429;147522714;147524952;147525129;147525511;147525611;147525749;147525954;147526722;147527597;147529097;147529108;147531897;147532129;147532944;147532987;147533336;147534237;147534971;147535884;147536185…
357	14	30010342	30543182	162	283330	30010342;30019860;30020456;30024123;30030095;30030219;30031578;30036865;30039094;30039770;30043104;30058623;30059156;30064272;30065125;30065696;30074238;30074978;30076608;30078322;30084413;30091258;30091860;30093095;30094968;30097056;30108488;30108596;30109387;30117696;30130719;30132880;30136345;30142644;30144264;30144410;30147765;30150807;30151156;30151264;30151568;30151711;30151893;30152239;301…
356	14	95694831	95834659	79	308712	95694831;95694888;95695051;95695152;95695895;95696137;95696636;95696820;95697999;95698173;95698250;95698386;95700195;95701812;95710547;95717827;95720603;95721992;95722011;95724264;95724293;95725797;95728395;95729757;95732093;95732392;95734377;95738939;95748149;95748301;95751289;95751854;95755712;95756204;95757109;95757334;95757381;95757614;95757813;95757897;95758090;95758395;95762035;95762730;957…
355	14	62005299	62220039	114	321153	62005299;62008090;62008459;62010321;62013075;62013887;62014190;62016815;62021101;62022647;62022685;62023519;62025095;62028421;62028728;62030023;62031044;62031078;62031120;62031399;62031923;62032611;62033060;62033422;62034111;62035400;62035783;62036143;62036189;62036334;62036568;62036705;62037421;62038002;62038404;62038827;62039350;62040582;62040755;62041612;62041859;62042376;62042486;62043291;620…
354	14	80857069	80911603	79	326677	80857069;80858103;80858257;80858555;80858762;80858876;80859293;80859766;80859909;80859924;80860259;80860335;80860503;80860611;80860660;80860761;80860936;80861413;80862048;80862509;80862915;80862936;80863691;80863832;80863857;80864238;80864348;80864403;80864526;80864691;80865256;80865451;80865478;80865733;80865778;80865947;80866020;80866254;80867354;80867605;80867715;80867819;80868167;80868509;808…
353	14	55244331	56346085	430	420744	55244331;55244571;55245822;55248395;55252085;55252734;55252971;55255272;55264141;55265027;55265080;55265526;55265784;55267098;55268684;55269334;55286505;55287214;55290408;55296798;55303559;55307238;55311616;55313506;55318053;55320108;55320132;55321386;55324264;55326331;55328900;55338280;55338300;55347974;55353227;55357051;55358453;55359993;55362708;55364979;55368715;55371706;55379597;55380632;553…
1447	7	35357904	35610009	102	226220	35357904;35357918;35357961;35358815;35363329;35363629;35366301;35367319;35368905;35373404;35375603;35386271;35387673;35388310;35391373;35398010;35401168;35408735;35412041;35413468;35422190;35422611;35431468;35436001;35442546;35446611;35447032;35447247;35448467;35451312;35453732;35456664;35461025;35461599;35467213;35474775;35479207;35480401;35480452;35481788;35484761;35491915;35499040;35499741;355…
289	13	110701483	110806278	83	374424	110701483;110702936;110703488;110704113;110720522;110722876;110726140;110726639;110730070;110730327;110730402;110730759;110733015;110733748;110741813;110744339;110746354;110749653;110751992;110757887;110758712;110760505;110764204;110765426;110767917;110768002;110775448;110781487;110782072;110782264;110782724;110783072;110783089;110783412;110783752;110784037;110785054;110785527;110785603;110785625…
288	13	27845548	28451277	224	410512	27845548;27848507;27850378;27852665;27853549;27854199;27855365;27855600;27857542;27866444;27868251;27871603;27872309;27873390;27878484;27879526;27882249;27888393;27888804;27891925;27892119;27894213;27898721;27903933;27904178;27909484;27911116;27915667;27918639;27918698;27919034;27919246;27919648;27919689;27920452;27920468;27920494;27920657;27921242;27921658;27922574;27924303;27924604;27925061;279…
1444	7	53730515	55118387	862	236982	53730515;53731308;53732973;53735150;53737524;53737592;53740179;53740311;53740855;53743974;53753308;53753847;53754412;53755644;53756492;53771026;53775870;53777692;53782256;53784262;53785552;53789801;53795180;53797900;53800267;53800337;53807340;53815061;53816034;53817735;53818322;53819713;53822503;53823851;53825129;53825280;53830543;53831519;53837100;53837656;53837748;53839666;53843876;53846218;538…
280	12	12540620	12710877	54	106937	12540620;12545754;12553944;12557600;12563618;12573881;12574244;12575703;12578277;12583637;12588791;12589069;12595999;12597211;12609565;12609988;12612914;12613418;12615238;12616649;12618690;12622857;12623863;12624241;12624335;12625820;12628509;12629592;12633360;12634131;12635960;12637257;12637542;12641308;12646408;12647216;12650225;12656622;12656820;12662772;12666571;12670850;12670890;12675854;126…
283	12	43576794	43975686	156	105616	43576794;43581261;43581547;43581708;43587116;43591174;43591657;43599915;43617303;43617870;43620333;43620399;43621311;43621377;43621683;43621835;43625364;43625385;43625840;43628552;43632925;43633790;43636445;43637198;43641572;43642355;43651480;43665229;43665446;43665601;43666050;43666624;43666886;43666945;43667019;43667147;43668715;43668875;43669720;43672218;43674908;43675703;43676275;43676874;436…
282	12	87266585	88167370	434	105880	87266585;87268783;87277012;87277955;87287646;87295144;87295836;87298097;87299724;87300637;87303343;87314303;87319247;87319802;87319828;87321722;87325704;87334229;87335093;87339741;87339959;87342616;87343190;87348903;87349039;87352631;87360344;87360831;87362641;87364074;87364544;87375439;87377325;87382034;87383259;87383479;87384033;87384884;87385405;87386704;87386835;87388022;87390132;87392382;873…
285	12	96048079	96364340	82	103797	96048079;96059957;96069517;96075293;96077054;96091003;96095158;96101271;96101720;96104461;96105945;96114681;96119016;96125144;96129363;96131046;96131895;96136726;96139362;96150215;96162434;96164160;96169046;96179500;96193112;96194586;96195058;96196642;96196672;96199494;96203900;96205600;96205704;96208984;96210292;96210763;96215828;96222640;96224127;96231458;96239010;96239064;96239211;96244337;962…
286	12	26253168	26347978	45	100975	26253168;26258574;26260084;26261001;26261450;26261737;26264277;26268779;26273317;26274410;26277129;26282052;26284733;26284914;26287765;26287830;26291158;26295301;26296592;26296993;26297994;26299452;26300553;26302917;26305265;26306795;26308154;26310251;26310551;26312745;26313598;26316662;26318539;26327811;26329776;26330797;26336017;26339645;26342243;26344866;26345213;26345227;26347259;26347768;263…
1440	7	81538359	81778467	100	298212	81538359;81542875;81543561;81544386;81548282;81551088;81551669;81552041;81552275;81557926;81565822;81567748;81569183;81569684;81570213;81573143;81573440;81575309;81581004;81583455;81589748;81591706;81595940;81600651;81600961;81601069;81602077;81603267;81604806;81607272;81607669;81610091;81615197;81618577;81623381;81624915;81626280;81631837;81635298;81637150;81637774;81641252;81641631;81643672;816…
267	12	13574028	13658686	50	113158	13574028;13576220;13577450;13577706;13579745;13580772;13581191;13582981;13584245;13584297;13587669;13590359;13591156;13591235;13591606;13591915;13592020;13594780;13596041;13599435;13599803;13602756;13603234;13603270;13605365;13605914;13608411;13609454;13612838;13615563;13616624;13617712;13618570;13621887;13628101;13628681;13630590;13630629;13632015;13633168;13633406;13635891;13641636;13643557;136…
265	12	48969324	49124908	55	114583	48969324;48970833;48971009;48973575;48983748;48987394;48988818;48991728;48992596;48993193;48994544;48994790;48995417;49001096;49001224;49001866;49007030;49009530;49010373;49011908;49011987;49012249;49017328;49021027;49026008;49027635;49030094;49030284;49039566;49041245;49042026;49042701;49044805;49047001;49047121;49051944;49052609;49060267;49068291;49073396;49083192;49087325;49087899;49088947;491…
264	12	117351002	117508021	70	114630	117351002;117352929;117360170;117362051;117370366;117374033;117375315;117376508;117384313;117385805;117386524;117388839;117392933;117392985;117394332;117399730;117400186;117401266;117402583;117410939;117412740;117413559;117413899;117414013;117418505;117420778;117425745;117429042;117431361;117437222;117439021;117442617;117443500;117445968;117448790;117448806;117449667;117450399;117451520;117455299…
269	12	69475083	69624911	47	111359	69475083;69475673;69488949;69496243;69498014;69498766;69500330;69500340;69500397;69504996;69515863;69516702;69517760;69527140;69530618;69531211;69541440;69541875;69544046;69551426;69554196;69554549;69554717;69563662;69563773;69565112;69565567;69567079;69574104;69575409;69576963;69578714;69580565;69586090;69586299;69586870;69587712;69590134;69590788;69602507;69605680;69605853;69605905;69612900;696…
1562	8	31501133	31791410	161	128233	31501133;31502994;31508716;31520045;31523182;31527279;31528200;31535702;31536194;31537382;31539377;31540094;31540418;31544978;31546576;31546940;31547502;31551808;31552222;31552551;31555273;31555988;31556327;31557809;31559014;31561007;31561543;31562869;31566902;31572180;31575968;31577954;31578418;31578797;31578842;31579250;31579344;31579715;31579812;31579838;31579851;31580403;31580504;31580667;315…
1564	8	17640680	17913060	113	126423	17640680;17642546;17645388;17650647;17650765;17655654;17656178;17656929;17657538;17657637;17660054;17660508;17663400;17675311;17678650;17679079;17683737;17687713;17692145;17694455;17695559;17702088;17702348;17704449;17704548;17705283;17705302;17706248;17707975;17708438;17711593;17712488;17712629;17712695;17720505;17720679;17721313;17721984;17722074;17724743;17725056;17726396;17727083;17733505;177…
1565	8	22621914	22759495	42	125878	22621914;22624446;22625989;22627992;22629031;22629078;22629891;22631374;22640372;22642785;22643013;22644011;22647119;22647145;22654153;22658248;22659057;22659628;22659783;22672855;22678586;22682089;22700836;22706292;22707098;22714093;22716856;22717104;22717341;22720632;22728120;22728656;22732729;22734309;22734533;22737060;22742807;22743426;22746472;22748249;22757004;22759495
988	3	161627469	162510086	447	308246	161627469;161633696;161633957;161642627;161642700;161646443;161648844;161656877;161657232;161657831;161660715;161661584;161661750;161665143;161666875;161668092;161670091;161670580;161671183;161673470;161674093;161675024;161679898;161682283;161683332;161683815;161683859;161684864;161685455;161687983;161690970;161697871;161700737;161702085;161707447;161707661;161708249;161711412;161711870;161712035…
989	3	3560314	3798319	103	283149	3560314;3563356;3565473;3568517;3568569;3570194;3573185;3574281;3574403;3574830;3575677;3577719;3579773;3580279;3581031;3582014;3583825;3585807;3585903;3585975;3586131;3588042;3589431;3590114;3590223;3593124;3593216;3594569;3596915;3598831;3611774;3612360;3613499;3614282;3618220;3621690;3621944;3623944;3626973;3627205;3627906;3628913;3637274;3641960;3643813;3645362;3646904;3648863;3653339;3656564…
982	3	45843242	46654616	361	398655	45843242;45843315;45843439;45844198;45846769;45848760;45859651;45861932;45862952;45864732;45867440;45871908;45880481;45888690;45889921;45899651;45908116;45909024;45916786;45918215;45920298;45928769;45932407;45939016;45939802;45945132;45947018;45951647;45954339;45960420;45960700;45962603;45968043;45970944;45974092;45975443;45976662;45981171;45983476;45989873;45989921;45993645;45995748;45996501;459…
981	3	141565199	141892420	312	426229	141565199;141566397;141569258;141570093;141570191;141570275;141570294;141572902;141576311;141576832;141577313;141577497;141581114;141581318;141587159;141588962;141591121;141591569;141594417;141594547;141597365;141597538;141599505;141602770;141602898;141603150;141603751;141604403;141605822;141605916;141607056;141610544;141610606;141612119;141612504;141614836;141616198;141616804;141618579;141619862…
987	3	22648237	23644184	423	327395	22648237;22650357;22650894;22651350;22653102;22653321;22655673;22655894;22655994;22656343;22656732;22657757;22658305;22658613;22658700;22659172;22659924;22662389;22662659;22665135;22666834;22666861;22669997;22671776;22677586;22678338;22686816;22689421;22694050;22695949;22707523;22709062;22709867;22713060;22721665;22723843;22724975;22725997;22726063;22727498;22729606;22732442;22733694;22734981;227…
984	3	153410728	154701998	510	353027	153410728;153415270;153415873;153429747;153434015;153436518;153438059;153439834;153443455;153452268;153454246;153454779;153454868;153457692;153460029;153464176;153465457;153472977;153477560;153478114;153478681;153481622;153485962;153491953;153496036;153499325;153501693;153504293;153507239;153509020;153509751;153510142;153510381;153515841;153516320;153516342;153516729;153518898;153519342;153519915…
985	3	99502178	100550862	552	340908	99502178;99508234;99511360;99512010;99512890;99517081;99519928;99520075;99526087;99532443;99532494;99533889;99534156;99535510;99535837;99536407;99538470;99541255;99541670;99541800;99543091;99543704;99545841;99548939;99549483;99549899;99550915;99550949;99553978;99554369;99556975;99558267;99560450;99564304;99564550;99569770;99575474;99575789;99584426;99586435;99589999;99590450;99597532;99601536;996…
115	11	1247404	1690770	158	204860	1247404;1250909;1256306;1258421;1259266;1259410;1261906;1263757;1273017;1273646;1274003;1274493;1274704;1275043;1275095;1275121;1275135;1275148;1275225;1275274;1275318;1275554;1275669;1275742;1275767;1275896;1275911;1275988;1278268;1278304;1278796;1278912;1278948;1279116;1279354;1279612;1279764;1280050;1284589;1289139;1291548;1292601;1296751;1297319;1299757;1310144;1317680;1321375;1326032;1326214…
117	11	115845359	116033867	73	202400	115845359;115845703;115847237;115847895;115848599;115849279;115849445;115849866;115850171;115850399;115866169;115867328;115869549;115873059;115874250;115875609;115880013;115883852;115887322;115887670;115888639;115888844;115890235;115896996;115898868;115901532;115901654;115901864;115902510;115902795;115905046;115905779;115906957;115912012;115913308;115913593;115923138;115923576;115924415;115924534…
111	11	24845236	25168340	184	252816	24845236;24848775;24851782;24857299;24858250;24859088;24866681;24868127;24868520;24868689;24874334;24876326;24878645;24880157;24880250;24889376;24895682;24896281;24896350;24897383;24898238;24899563;24900290;24901582;24902252;24903614;24903957;24906611;24906712;24907557;24908526;24909329;24909780;24909982;24910495;24915429;24917426;24917933;24919056;24919447;24923598;24923914;24924117;24931950;249…
113	11	106639788	107001082	142	220273	106639788;106640384;106644815;106646755;106653552;106656480;106658594;106661045;106661655;106664545;106671874;106671981;106675882;106679022;106686091;106687636;106690136;106693751;106697666;106698356;106704918;106705281;106706810;106710332;106713136;106713535;106714219;106714698;106716991;106719109;106720120;106721116;106722067;106722797;106723862;106725353;106729902;106732836;106733667;106738484…
119	11	84636453	85525077	269	200935	84636453;84645429;84656696;84658816;84661906;84662230;84666206;84667782;84668325;84671454;84672112;84673340;84673740;84673825;84675281;84675415;84678220;84680543;84681050;84684515;84685584;84686288;84687580;84697240;84698086;84700645;84702144;84706970;84710772;84711788;84715131;84715607;84719010;84720278;84722666;84725375;84729619;84734913;84736202;84738057;84738527;84745267;84746420;84748072;847…
1632	9	90593451	90724831	48	142677	90593451;90599422;90610192;90611999;90615043;90615385;90617967;90625404;90628894;90632751;90633382;90640161;90640340;90641752;90644454;90646218;90648654;90648841;90651345;90651451;90654133;90659072;90659375;90659901;90662618;90677563;90696337;90696352;90696986;90698602;90699643;90700096;90700208;90701773;90701801;90703846;90704252;90704751;90704793;90707033;90711561;90718072;90719046;90721566;907…
1633	9	101933510	102273961	138	140280	101933510;101933859;101946029;101951820;101951991;101955350;101957256;101964939;101965633;101971829;101971995;101980367;101981229;101981941;101982671;101983008;101998431;102001368;102002005;102002462;102003055;102003111;102005189;102005826;102006819;102010510;102012469;102016542;102016871;102018741;102020649;102023294;102026140;102027184;102027396;102028094;102029041;102029445;102030173;102030324…
1637	9	136115044	136340436	106	131788	136115044;136116030;136117402;136122271;136122572;136122773;136126132;136133218;136133396;136134118;136134835;136137547;136137600;136137641;136138074;136138978;136139383;136139395;136139460;136139589;136139672;136139833;136140469;136140613;136143919;136147539;136147666;136147988;136148765;136157138;136159450;136165436;136178623;136180912;136186249;136189643;136189838;136192886;136196161;136196421…
568	18	59454649	60247378	313	311478	59454649;59454663;59457137;59459599;59459930;59460815;59462954;59464254;59465132;59466730;59467514;59469306;59469594;59471245;59472251;59473437;59477476;59485107;59486977;59488581;59491954;59496487;59500799;59500845;59501951;59503231;59504659;59505559;59508297;59508749;59508966;59509504;59509982;59521047;59524393;59525845;59526359;59531522;59541676;59542368;59544730;59545000;59546754;59546794;595…
569	18	49199153	49751073	288	302874	49199153;49200076;49200362;49201289;49217351;49219033;49224139;49224752;49229316;49231605;49232341;49233396;49235139;49235237;49236517;49236794;49238016;49239361;49240644;49240657;49241501;49242500;49244753;49246056;49247797;49247881;49247984;49249170;49249203;49249353;49249389;49249771;49250522;49250673;49252331;49252525;49252541;49255581;49255754;49256361;49256572;49256715;49256794;49257585;492…
563	17	38721397	38875025	75	105391	38721397;38724232;38730032;38734265;38736731;38739221;38743712;38748603;38749123;38750869;38760921;38761524;38761711;38763728;38764556;38766987;38767200;38768535;38769377;38774490;38779590;38780827;38781654;38789049;38794957;38796107;38816008;38817237;38817714;38824042;38825676;38827093;38827589;38831425;38832456;38832480;38833548;38833867;38834038;38834850;38835355;38837586;38838310;38838583;388…
565	18	24455712	24539865	191	666998	24455712;24455762;24455799;24455997;24456030;24456053;24456071;24456096;24456131;24456147;24456310;24456353;24456443;24456606;24456653;24456705;24456721;24456787;24456822;24456877;24457046;24457099;24457195;24457304;24457369;24457522;24457645;24457702;24457723;24457751;24457845;24458055;24458095;24458266;24458336;24458523;24458533;24458551;24458579;24458623;24458663;24458754;24458795;24458830;244…
1186	4	105971758	106481673	128	109726	105971758;105991381;106008764;106014524;106017298;106017366;106017816;106019832;106021269;106026929;106029107;106029257;106033004;106033944;106039195;106041012;106043675;106045488;106047994;106051192;106051891;106052609;106065023;106068498;106072203;106079003;106084592;106085774;106086360;106090645;106092120;106096967;106102940;106106725;106108639;106113568;106114894;106116095;106116808;106118321…
1187	4	16581788	16751729	54	109336	16581788;16584547;16587139;16592950;16595252;16595514;16600130;16604882;16613336;16616922;16617704;16617758;16618181;16619037;16621892;16624018;16624986;16633421;16634760;16635097;16635345;16637481;16639908;16640040;16640110;16640398;16641326;16647277;16652577;16653111;16662649;16665262;16666434;16685854;16690818;16692821;16694244;16695520;16696081;16698351;16712933;16713260;16715230;16719966;167…
1185	4	162928031	163163123	97	110256	162928031;162928455;162930302;162931864;162932739;162933010;162933193;162933479;162933766;162934057;162934590;162934834;162936938;162938109;162938410;162940013;162949261;162949610;162949827;162952888;162953038;162957470;162958336;162958555;162958577;162965974;162966315;162969619;162970750;162972592;162979369;162982342;162984390;162985173;162988783;162994948;162997234;162998582;162999347;163001159…
1182	4	175128076	175319045	85	113291	175128076;175129002;175136690;175139952;175140985;175142439;175145154;175149241;175158325;175159482;175163348;175167897;175168022;175168307;175168885;175174177;175174619;175176545;175176859;175179848;175180946;175181360;175188649;175188773;175193400;175193787;175196329;175197389;175198585;175205516;175205893;175208028;175209480;175209637;175209947;175219011;175219051;175221442;175225400;175228467…
1183	4	187986188	188082269	52	112271	187986188;187987600;187988683;187991806;187993235;187999158;188000438;188001857;188002291;188004621;188004805;188005137;188005273;188006250;188007250;188007766;188014561;188014794;188016494;188018575;188021315;188021896;188027951;188032371;188033856;188034008;188034045;188034089;188035092;188037548;188038113;188045751;188046191;188046463;188047729;188051535;188051723;188052019;188055800;188060840…
1181	4	123913368	124283682	124	115446	123913368;123923167;123923955;123924685;123943082;123944886;123948566;123958756;123959368;123963220;123970241;123973713;123974658;123976539;123982558;123984355;123984597;123991258;123998930;124000081;124011162;124011350;124013361;124023735;124024050;124028628;124029120;124031231;124032960;124033363;124037626;124037782;124038111;124039948;124040526;124042063;124048350;124052669;124056588;124057281…
726	1	206195970	206275442	35	125727	206195970;206199183;206201763;206202140;206208340;206210003;206219528;206228233;206228339;206229383;206229726;206230749;206233943;206234033;206234235;206234357;206234402;206234664;206234677;206235330;206235727;206238509;206243143;206250060;206250106;206251334;206252859;206253034;206254050;206257861;206261329;206262167;206262822;206272909;206275442
725	1	41865421	41971452	45	126314	41865421;41868279;41869172;41871861;41872127;41872334;41878911;41879445;41880219;41883139;41885120;41886510;41888416;41893230;41894655;41896597;41900278;41905232;41911598;41914348;41915964;41918239;41918387;41923684;41923847;41929384;41930310;41935758;41939095;41940022;41941599;41948681;41955099;41960148;41960296;41960662;41961225;41963022;41963714;41963811;41967909;41967974;41969428;41969880;419…
728	1	114913733	115222237	102	124678	114913733;114913923;114914554;114916782;114916857;114917547;114919403;114919675;114924203;114925583;114927709;114931209;114932553;114937110;114937358;114938160;114939907;114942982;114955623;114974036;114980030;114980091;114982271;114984032;114990547;114993719;114994911;114995578;114995660;114996321;114998644;114999195;114999861;115002548;115004735;115010869;115011775;115013830;115014197;115014565…
1164	4	5234185	5398991	68	126838	5234185;5237744;5238363;5240703;5241988;5242722;5242737;5244672;5245212;5245548;5249126;5249842;5252412;5254439;5259654;5260862;5262819;5267567;5269413;5270815;5276002;5281485;5284031;5284692;5285393;5285948;5287115;5291004;5292452;5294172;5299837;5300249;5301300;5302995;5307232;5309920;5310365;5324103;5325847;5329164;5335108;5338410;5339048;5339733;5343907;5345903;5360888;5361514;5362471;5364592…
1166	4	182486661	182595922	51	126022	182486661;182487427;182487527;182488234;182490275;182492064;182493442;182493703;182493723;182496541;182501046;182504679;182508167;182512973;182524440;182524623;182524823;182524855;182525146;182525210;182525380;182525399;182525572;182525785;182525867;182525909;182526070;182528639;182529569;182530485;182543005;182548239;182553954;182560913;182563465;182568250;182569629;182579521;182579992;182580425…
1163	4	55987185	56168566	86	127065	55987185;55987714;55994216;55995641;55998280;56000578;56001212;56006652;56006971;56013866;56013926;56017228;56026303;56027475;56029788;56031955;56035449;56041875;56051514;56051749;56051848;56052014;56052038;56052160;56052347;56052764;56052818;56052927;56060145;56060571;56060894;56061026;56065770;56067879;56067966;56072723;56076136;56077177;56083559;56085306;56090555;56091595;56092060;56094529;560…
1168	4	125018617	125468629	202	124021	125018617;125025360;125030587;125041491;125043103;125049022;125052666;125055342;125055927;125061872;125072198;125072367;125072640;125073255;125073570;125078223;125079156;125080694;125082351;125082369;125083378;125083426;125085187;125086587;125088194;125089871;125091484;125094870;125095619;125095676;125097633;125098819;125099432;125100856;125102732;125104186;125104825;125105257;125108153;125108565…
49	10	134336933	134669347	119	150428	134336933;134339323;134346559;134349372;134350334;134354080;134355068;134356082;134356997;134359737;134365308;134373019;134374166;134375812;134383912;134386174;134390454;134401750;134402669;134402784;134407815;134409465;134412728;134414627;134415481;134417950;134419215;134422071;134422501;134429034;134429547;134429558;134431572;134432604;134434612;134437683;134437912;134439500;134440772;134440852…
46	10	12962590	12990071	55	154547	12962590;12962643;12962687;12962992;12963067;12963209;12963366;12963657;12963727;12963847;12964106;12964404;12964522;12964889;12965000;12965081;12965215;12965326;12965363;12965654;12965678;12966061;12966655;12966703;12966745;12966823;12966837;12966848;12966989;12967185;12967237;12967307;12967668;12967801;12968193;12968311;12968419;12968591;12968882;12969141;12969463;12969666;12969834;12970342;129…
45	10	62561780	63033717	226	156172	62561780;62563996;62565684;62566672;62573083;62574893;62576046;62580196;62581763;62583321;62588849;62590392;62590724;62591908;62593751;62594099;62597776;62598588;62599384;62602205;62606650;62607042;62609738;62610324;62612152;62614345;62614578;62616045;62617504;62619724;62623425;62624715;62629164;62631801;62638940;62640965;62649520;62650121;62653655;62670456;62675820;62677699;62682045;62684175;626…
42	10	68772533	69136415	132	163467	68772533;68789372;68792867;68792881;68799115;68799268;68799802;68802614;68812897;68814290;68814708;68814896;68815305;68815968;68823747;68832443;68832518;68837868;68838254;68839232;68839751;68841640;68846796;68850227;68857397;68861306;68862903;68873470;68875138;68875566;68876660;68886790;68887359;68888491;68891196;68891892;68897900;68902447;68903707;68912146;68913933;68915432;68919557;68925385;689…
41	10	34443123	34699476	108	164500	34443123;34443426;34443468;34446312;34446857;34447219;34449264;34454423;34457150;34463038;34463579;34468587;34469124;34469255;34470507;34471188;34474937;34483954;34490829;34491039;34492021;34492121;34492439;34492775;34493043;34493274;34494481;34494907;34497367;34501988;34502333;34503122;34505078;34505601;34506001;34506579;34509215;34510647;34511195;34511795;34511897;34515785;34516354;34516420;345…
1569	8	3519953	3576806	58	121837	3519953;3520368;3521229;3522713;3523036;3525322;3526043;3527439;3533916;3533938;3533962;3535370;3535458;3536044;3536466;3537871;3538682;3538776;3538972;3539119;3539368;3539422;3539633;3539692;3539802;3540073;3540396;3541388;3544339;3544417;3546601;3548033;3549667;3550976;3553020;3553666;3555424;3556413;3556564;3556651;3556720;3556816;3556865;3556968;3557171;3557229;3557677;3557936;3561893;3563297…
474	16	8302778	8456151	119	391371	8302778;8302797;8304822;8304905;8305490;8305513;8306425;8308802;8310197;8311016;8311264;8312431;8314169;8314221;8314362;8314685;8314993;8315122;8315254;8315846;8316263;8316357;8316512;8317013;8317335;8317378;8317535;8317602;8317713;8317768;8317812;8317872;8317940;8318048;8318153;8318272;8318287;8318314;8318538;8318847;8318934;8319124;8319794;8320654;8322446;8323809;8327028;8329263;8330072;8330830…
473	16	76653780	78762488	899	729386	76653780;76654490;76655542;76655637;76661156;76680924;76682308;76682467;76685397;76687310;76693868;76702863;76704259;76704557;76705740;76705931;76712056;76712542;76719450;76719691;76720968;76727291;76727910;76729336;76730632;76750414;76758585;76762875;76765937;76768750;76769780;76770296;76771360;76772180;76772631;76773812;76774219;76776428;76777664;76786293;76786807;76787388;76789824;76795661;768…
477	16	87240828	87508230	166	340220	87240828;87248053;87250588;87251095;87253307;87253492;87257415;87258251;87262235;87263669;87264271;87264317;87265240;87266949;87268466;87273908;87274568;87277037;87277564;87282825;87283169;87286430;87286545;87286560;87287471;87289411;87296985;87297953;87300200;87301100;87303566;87304423;87305577;87309111;87309270;87310001;87313566;87317831;87324345;87324361;87324426;87325979;87328152;87328826;873…
1360	6	17489435	17754804	73	156396	17489435;17489824;17489887;17495490;17497061;17505389;17508223;17515094;17521957;17523735;17524627;17540895;17542668;17546421;17547749;17550297;17555294;17558369;17561416;17579084;17581194;17582457;17585121;17585333;17586127;17588273;17589004;17594847;17595629;17612315;17612717;17619259;17627655;17633221;17639015;17640189;17641232;17643718;17649177;17654940;17659518;17667896;17668781;17670738;176…
478	16	54726177	54866192	106	299257	54726177;54733579;54752228;54758803;54760866;54764135;54764761;54765815;54769074;54769098;54769281;54769758;54770489;54771644;54771810;54773755;54774994;54775342;54775989;54776161;54776238;54776287;54776518;54777174;54777248;54777470;54777524;54777604;54777820;54777939;54778037;54778907;54779363;54779595;54780482;54780625;54780665;54780916;54780957;54781149;54781384;54781485;54781556;54781835;547…
479	16	82977944	83079757	108	285460	82977944;82985800;82987514;82990852;82991542;82994095;82995450;82996223;82996551;82999595;82999719;82999786;82999810;82999826;83000031;83000138;83000553;83002100;83002319;83004629;83005685;83008719;83008906;83009185;83009555;83010034;83012365;83012690;83016277;83016323;83016552;83019078;83019949;83020813;83022510;83022544;83023207;83024484;83024864;83025304;83028637;83029987;83030220;83030936;830…

## Sheet: Supplementary File 1d
U and Q95 scan results
Window	Q95	U20	U20 SNPs:Frequency in Estonians	Genes in Window
1:169000001-169040000	0.363208	8	1_169002567:0.224056603773585;1_169002905:0.224056603773585;1_169004329:0.224056603773585;1_169016679:0.334905660377358;1_169025805:0.363207547169811;1_169029531:0.363207547169811;1_169032825:0.363207547169811;1_169039605:0.363207547169811;	x
1:169040001-169080000	0.326651	4	1_169061558:0.330188679245283;1_169073504:0.326650943396226;1_169076212:0.321933962264151;1_169078990:0.232311320754717;	ATP1B1
1:193800001-193840000	0.284198	7	1_193807578:0.284198113207547;1_193815936:0.281839622641509;1_193819043:0.281839622641509;1_193820438:0.283018867924528;1_193825654:0.281839622641509;1_193829308:0.268867924528302;1_193830344:0.258254716981132;	x
1:193840001-193880000	0.259434	8	1_193861954:0.258254716981132;1_193867551:0.259433962264151;1_193870978:0.259433962264151;1_193871294:0.259433962264151;1_193878858:0.259433962264151;1_193879195:0.259433962264151;1_193879614:0.259433962264151;1_193879635:0.259433962264151;	x
1:201040001-201080000	0.284198	5	1_201052310:0.284198113207547;1_201052312:0.284198113207547;1_201052474:0.284198113207547;1_201052562:0.284198113207547;1_201052743:0.284198113207547;	CACNA1S
1:210880001-210920000	0.272406	3	1_210899573:0.272405660377358;1_210904137:0.26061320754717;1_210915548:0.252358490566038;	KCNH1
1:210920001-210960000	0.257075	12	1_210922986:0.253537735849057;1_210925860:0.241745283018868;1_210927618:0.254716981132075;1_210930475:0.241745283018868;1_210939858:0.257075471698113;1_210939910:0.257075471698113;1_210940592:0.245283018867925;1_210940870:0.257075471698113;1_210943930:0.231132075471698;1_210947481:0.231132075471698;1_210949118:0.231132075471698;1_210954663:0.257075471698113;	KCNH1
1:210960001-211000000	0.258255	8	1_210963457:0.258254716981132;1_210964570:0.258254716981132;1_210968302:0.258254716981132;1_210969814:0.257075471698113;1_210973073:0.257075471698113;1_210975534:0.257075471698113;1_210981829:0.214622641509434;1_210991651:0.214622641509434;	KCNH1
1:212320001-212360000	0.300708	3	1_212351252:0.300707547169811;1_212352702:0.300707547169811;1_212352727:0.300707547169811;	x
1:212360001-212400000	0.292453	3	1_212389801:0.292452830188679;1_212391954:0.29127358490566;1_212394364:0.286556603773585;	x
1:212400001-212440000	0.286557	11	1_212401103:0.285377358490566;1_212401748:0.274764150943396;1_212407195:0.215801886792453;1_212425665:0.222877358490566;1_212429194:0.286556603773585;1_212429402:0.286556603773585;1_212429403:0.286556603773585;1_212429404:0.286556603773585;1_212431200:0.286556603773585;1_212432926:0.286556603773585;1_212434241:0.286556603773585;	x
1:212440001-212480000	0.293632	6	1_212450399:0.292452830188679;1_212454914:0.292452830188679;1_212461169:0.293632075471698;1_212467935:0.293632075471698;1_212470340:0.293632075471698;1_212474910:0.292452830188679;	PPP2R5A
1:212520001-212560000	0.294811	3	1_212549360:0.292452830188679;1_212550531:0.292452830188679;1_212559906:0.294811320754717;	PPP2R5A,TMEM206
1:216640001-216680000	0.270047	3	1_216642595:0.270047169811321;1_216645406:0.229952830188679;1_216649983:0.258254716981132;	ESRRG
1:216680001-216720000	0.275943	3	1_216681556:0.275943396226415;1_216696927:0.273584905660377;1_216716495:0.267688679245283;	ESRRG
1:216720001-216760000	0.291274	4	1_216729434:0.29127358490566;1_216730387:0.25;1_216737861:0.264150943396226;1_216740671:0.264150943396226;	ESRRG
1:216760001-216800000	0.320755	7	1_216762192:0.30188679245283;1_216780709:0.321933962264151;1_216786354:0.320754716981132;1_216787802:0.320754716981132;1_216792186:0.320754716981132;1_216793319:0.320754716981132;1_216794258:0.320754716981132;	ESRRG
1:216800001-216840000	0.353774	11	1_216805307:0.252358490566038;1_216805985:0.320754716981132;1_216808512:0.327830188679245;1_216811291:0.326650943396226;1_216815082:0.32311320754717;1_216820547:0.344339622641509;1_216828849:0.35377358490566;1_216828969:0.35377358490566;1_216832802:0.35377358490566;1_216833627:0.35377358490566;1_216839984:0.35377358490566;	ESRRG
1:216840001-216880000	0.357311	12	1_216840114:0.35377358490566;1_216841686:0.357311320754717;1_216844680:0.35377358490566;1_216846256:0.35377358490566;1_216848771:0.358490566037736;1_216850238:0.354952830188679;1_216854455:0.317216981132075;1_216864923:0.314858490566038;1_216866570:0.314858490566038;1_216872201:0.330188679245283;1_216874423:0.326650943396226;1_216877239:0.326650943396226;	ESRRG
1:217160001-217200000	0.264151	18	1_217170732:0.262971698113208;1_217171907:0.264150943396226;1_217174577:0.264150943396226;1_217183895:0.242924528301887;1_217184180:0.244103773584906;1_217184731:0.244103773584906;1_217185265:0.242924528301887;1_217185975:0.244103773584906;1_217187026:0.23938679245283;1_217188451:0.233490566037736;1_217188504:0.233490566037736;1_217188505:0.233490566037736;1_217188581:0.233490566037736;1_21719060…	ESRRG
1:217280001-217320000	0.266509	4	1_217280568:0.266509433962264;1_217292522:0.242924528301887;1_217298122:0.242924528301887;1_217299832:0.242924528301887;	ESRRG
1:33320001-33360000	0.273585	8	1_33324088:0.231132075471698;1_33326172:0.233490566037736;1_33335039:0.233490566037736;1_33336956:0.233490566037736;1_33337632:0.234669811320755;1_33342304:0.233490566037736;1_33352771:0.273584905660377;1_33355923:0.273584905660377;	S100PBP,FNDC5,HPCA
1:34240001-34280000	0.336085	4	1_34257817:0.283018867924528;1_34264478:0.32311320754717;1_34265969:0.32311320754717;1_34277722:0.336084905660377;	CSMD2
1:40000001-40040000	0.264151	3	1_40028180:0.264150943396226;1_40036847:0.264150943396226;1_40038571:0.264150943396226;	PABPC4
1:45080001-45120000	0.362028	3	1_45111294:0.345518867924528;1_45119390:0.350235849056604;1_45119965:0.362028301886792;	RNF220,TMEM53
1:57200001-57240000	0.413915	4	1_57218432:0.373820754716981;1_57220302:0.373820754716981;1_57224460:0.413915094339623;1_57238202:0.266509433962264;	C1orf168
1:57240001-57280000	0.319575	8	1_57244135:0.318396226415094;1_57244210:0.30188679245283;1_57245830:0.319575471698113;1_57259058:0.290094339622642;1_57264205:0.290094339622642;1_57265318:0.290094339622642;1_57266046:0.290094339622642;1_57266607:0.287735849056604;	C1orf168
1:79520001-79560000	0.272406	7	1_79521545:0.252358490566038;1_79533747:0.252358490566038;1_79538377:0.272405660377358;1_79540215:0.252358490566038;1_79543948:0.253537735849057;1_79545012:0.252358490566038;1_79548945:0.252358490566038;	x
10:11840001-11880000	0.272406	4	10_11847184:0.272405660377358;10_11848792:0.234669811320755;10_11853108:0.234669811320755;10_11855221:0.261792452830189;	PROSER2
10:123040001-123080000	0.284198	7	10_123045870:0.284198113207547;10_123046378:0.284198113207547;10_123046873:0.284198113207547;10_123047640:0.284198113207547;10_123047691:0.284198113207547;10_123047721:0.284198113207547;10_123049264:0.284198113207547;	x
10:129280001-129320000	0.28184	5	10_129293442:0.275943396226415;10_129294442:0.286556603773585;10_129296847:0.278301886792453;10_129298251:0.281839622641509;10_129303033:0.26061320754717;	x
10:131800001-131840000	0.270047	3	10_131824311:0.254716981132075;10_131826112:0.270047169811321;10_131836715:0.258254716981132;	x
10:133920001-133960000	0.358491	8	10_133920011:0.245283018867925;10_133932471:0.214622641509434;10_133944158:0.314858490566038;10_133944701:0.317216981132075;10_133946337:0.358490566037736;10_133948634:0.314858490566038;10_133950241:0.307783018867925;10_133959895:0.22877358490566;	JAKMIP3
10:20280001-20320000	0.316038	6	10_20309308:0.313679245283019;10_20309449:0.313679245283019;10_20309814:0.313679245283019;10_20309828:0.313679245283019;10_20310106:0.313679245283019;10_20310507:0.316037735849057;	PLXDC2
10:64400001-64440000	0.299528	6	10_64405646:0.299528301886792;10_64414060:0.299528301886792;10_64415184:0.299528301886792;10_64424284:0.299528301886792;10_64429595:0.273584905660377;10_64430302:0.273584905660377;	ZNF365
10:6480001-6520000	0.260613	3	10_6500785:0.258254716981132;10_6500858:0.258254716981132;10_6503894:0.26061320754717;	PRKCQ
10:70960001-71000000	0.278302	5	10_70976577:0.26061320754717;10_70978030:0.26061320754717;10_70989060:0.258254716981132;10_70989538:0.278301886792453;10_70991788:0.26061320754717;	SUPV3L1,HKDC1
10:71000001-71040000	0.298349	4	10_71008656:0.295990566037736;10_71013163:0.298349056603774;10_71013216:0.298349056603774;10_71014413:0.298349056603774;	HKDC1,HK1
10:71280001-71320000	0.293632	3	10_71313183:0.292452830188679;10_71313226:0.292452830188679;10_71318649:0.293632075471698;	x
10:71320001-71360000	0.366745	3	10_71321174:0.344339622641509;10_71333783:0.366745283018868;10_71338470:0.212264150943396;	NEUROG3
10:72280001-72320000	0.275943	5	10_72286397:0.266509433962264;10_72288410:0.266509433962264;10_72301920:0.264150943396226;10_72305512:0.275943396226415;10_72311874:0.26061320754717;	PALD1
10:72480001-72520000	0.317217	7	10_72501500:0.299528301886792;10_72501736:0.299528301886792;10_72504078:0.314858490566038;10_72504354:0.314858490566038;10_72505208:0.317216981132075;10_72505243:0.317216981132075;10_72513635:0.284198113207547;	ADAMTS14
11:102360001-102400000	0.260613	5	11_102389904:0.258254716981132;11_102392656:0.259433962264151;11_102393547:0.259433962264151;11_102394291:0.26061320754717;11_102398593:0.26061320754717;	RP11-315O6.2,MMP7
11:110840001-110880000	0.408019	5	11_110852008:0.253537735849057;11_110859900:0.336084905660377;11_110864984:0.408018867924528;11_110866322:0.336084905660377;11_110873464:0.336084905660377;	x
11:110880001-110920000	0.338443	6	11_110880927:0.337264150943396;11_110883207:0.337264150943396;11_110889047:0.337264150943396;11_110915544:0.338443396226415;11_110917166:0.338443396226415;11_110919289:0.338443396226415;	x
11:11480001-11520000	0.358491	4	11_11490924:0.299528301886792;11_11492715:0.300707547169811;11_11504981:0.300707547169811;11_11507780:0.358490566037736;	GALNT18
11:11560001-11600000	0.337264	9	11_11569020:0.337264150943396;11_11571744:0.337264150943396;11_11575213:0.337264150943396;11_11578241:0.334905660377358;11_11582784:0.314858490566038;11_11586257:0.314858490566038;11_11589168:0.310141509433962;11_11589901:0.318396226415094;11_11591675:0.318396226415094;	GALNT18
11:44840001-44880000	0.321934	4	11_44853691:0.245283018867925;11_44867499:0.253537735849057;11_44873126:0.321933962264151;11_44874510:0.304245283018868;	TSPAN18
11:44880001-44920000	0.42217	5	11_44889570:0.273584905660377;11_44898433:0.265330188679245;11_44907206:0.247641509433962;11_44909449:0.251179245283019;11_44916374:0.422169811320755;	TSPAN18,TP53I11
12:113360001-113400000	0.266509	29	12_113360302:0.26061320754717;12_113362751:0.266509433962264;12_113362974:0.266509433962264;12_113362997:0.266509433962264;12_113363077:0.266509433962264;12_113363109:0.266509433962264;12_113363178:0.266509433962264;12_113363692:0.266509433962264;12_113363922:0.266509433962264;12_113363972:0.266509433962264;12_113365581:0.265330188679245;12_113365667:0.266509433962264;12_113365687:0.2665094339622…	OAS1,OAS3
12:131320001-131360000	0.259434	4	12_131320193:0.259433962264151;12_131320525:0.259433962264151;12_131321184:0.259433962264151;12_131321214:0.259433962264151;	STX2,RAN
12:133320001-133360000	0.270047	3	12_133340853:0.270047169811321;12_133342927:0.268867924528302;12_133346212:0.267688679245283;	ANKLE2,GOLGA3
12:133360001-133400000	0.316038	6	12_133364785:0.316037735849057;12_133372923:0.316037735849057;12_133384864:0.314858490566038;12_133389998:0.207547169811321;12_133399553:0.310141509433962;12_133399746:0.308962264150943;	GOLGA3,CHFR
12:133400001-133440000	0.314858	6	12_133401945:0.200471698113208;12_133404805:0.308962264150943;12_133414560:0.314858490566038;12_133423695:0.314858490566038;12_133426483:0.314858490566038;12_133428131:0.314858490566038;	GOLGA3,CHFR
12:133680001-133720000	0.352594	7	12_133685024:0.352594339622642;12_133698537:0.352594339622642;12_133699101:0.352594339622642;12_133699803:0.352594339622642;12_133702259:0.352594339622642;12_133706647:0.344339622641509;12_133708763:0.344339622641509;	ZNF140,ZNF891,ZNF10,CTD-2140B24.4,ZNF268
12:133720001-133760000	0.34434	3	12_133721452:0.344339622641509;12_133734113:0.337264150943396;12_133736546:0.338443396226415;	ZNF10,CTD-2140B24.4,ZNF268
12:133760001-133800000	0.332547	6	12_133768553:0.332547169811321;12_133783814:0.332547169811321;12_133792151:0.331367924528302;12_133792476:0.332547169811321;12_133794103:0.330188679245283;12_133794352:0.332547169811321;	CTD-2140B24.4,ZNF268,AC226150.4,ANHX
12:133800001-133840000	0.301887	4	12_133803093:0.298349056603774;12_133805050:0.299528301886792;12_133808129:0.299528301886792;12_133809428:0.30188679245283;	ANHX
12:14120001-14160000	0.319575	8	12_14124144:0.314858490566038;12_14128322:0.318396226415094;12_14129416:0.318396226415094;12_14135275:0.310141509433962;12_14138035:0.318396226415094;12_14147873:0.317216981132075;12_14149486:0.314858490566038;12_14152997:0.319575471698113;	GRIN2B
12:16880001-16920000	0.275943	4	12_16910699:0.275943396226415;12_16911380:0.275943396226415;12_16911631:0.275943396226415;12_16912091:0.275943396226415;	x
12:26360001-26400000	0.274764	5	12_26364263:0.206367924528302;12_26368011:0.206367924528302;12_26373115:0.206367924528302;12_26374615:0.274764150943396;12_26375436:0.274764150943396;	SSPN
12:27920001-27960000	0.266509	7	12_27925443:0.257075471698113;12_27926784:0.257075471698113;12_27927144:0.257075471698113;12_27938571:0.262971698113208;12_27946919:0.266509433962264;12_27949283:0.266509433962264;12_27959998:0.206367924528302;	MANSC4,KLHL42
12:28240001-28280000	0.29717	3	12_28250619:0.297169811320755;12_28255797:0.297169811320755;12_28279773:0.268867924528302;	x
12:28280001-28320000	0.273585	9	12_28282006:0.268867924528302;12_28282047:0.268867924528302;12_28284841:0.246462264150943;12_28289203:0.266509433962264;12_28293955:0.27122641509434;12_28297547:0.273584905660377;12_28310092:0.267688679245283;12_28310205:0.267688679245283;12_28318354:0.270047169811321;	CCDC91
12:28320001-28360000	0.267689	5	12_28336371:0.267688679245283;12_28343238:0.245283018867925;12_28345087:0.267688679245283;12_28345444:0.267688679245283;12_28357688:0.267688679245283;	CCDC91
12:28360001-28400000	0.267689	4	12_28368535:0.267688679245283;12_28368617:0.267688679245283;12_28382705:0.267688679245283;12_28388445:0.267688679245283;	CCDC91
12:28400001-28440000	0.258255	6	12_28406417:0.258254716981132;12_28412372:0.258254716981132;12_28412835:0.257075471698113;12_28416048:0.258254716981132;12_28417728:0.258254716981132;12_28433113:0.258254716981132;	CCDC91
12:28440001-28480000	0.258255	15	12_28445269:0.258254716981132;12_28446889:0.258254716981132;12_28457802:0.258254716981132;12_28463119:0.258254716981132;12_28463444:0.258254716981132;12_28463589:0.258254716981132;12_28466160:0.258254716981132;12_28466902:0.258254716981132;12_28467684:0.258254716981132;12_28470084:0.258254716981132;12_28470847:0.258254716981132;12_28472023:0.258254716981132;12_28472101:0.258254716981132;12_284732…	CCDC91
12:28480001-28520000	0.260613	7	12_28487853:0.26061320754717;12_28499350:0.26061320754717;12_28507530:0.26061320754717;12_28509933:0.26061320754717;12_28511524:0.26061320754717;12_28515752:0.26061320754717;12_28517852:0.26061320754717;	CCDC91
12:28520001-28560000	0.262972	6	12_28530125:0.26061320754717;12_28538435:0.26061320754717;12_28539756:0.262971698113208;12_28543151:0.238207547169811;12_28546567:0.26061320754717;12_28549131:0.258254716981132;	CCDC91
12:28560001-28600000	0.258255	10	12_28564261:0.258254716981132;12_28566952:0.258254716981132;12_28567370:0.258254716981132;12_28567965:0.257075471698113;12_28571561:0.257075471698113;12_28575744:0.257075471698113;12_28582971:0.258254716981132;12_28582984:0.258254716981132;12_28583051:0.258254716981132;12_28583301:0.258254716981132;	CCDC91
12:28600001-28640000	0.261792	25	12_28600244:0.257075471698113;12_28602093:0.258254716981132;12_28602792:0.258254716981132;12_28605233:0.258254716981132;12_28606277:0.258254716981132;12_28606304:0.258254716981132;12_28606428:0.258254716981132;12_28610017:0.259433962264151;12_28610570:0.261792452830189;12_28610670:0.261792452830189;12_28612322:0.261792452830189;12_28614229:0.261792452830189;12_28614709:0.261792452830189;12_286148…	CCDC91
12:28640001-28680000	0.261792	12	12_28650565:0.261792452830189;12_28650613:0.261792452830189;12_28651146:0.261792452830189;12_28658039:0.261792452830189;12_28658479:0.261792452830189;12_28659172:0.261792452830189;12_28659918:0.261792452830189;12_28660527:0.261792452830189;12_28662696:0.261792452830189;12_28663667:0.261792452830189;12_28666566:0.261792452830189;12_28666593:0.261792452830189;	CCDC91
12:28680001-28720000	0.258255	4	12_28697814:0.237028301886792;12_28698032:0.258254716981132;12_28711545:0.221698113207547;12_28716488:0.242924528301887;	CCDC91
12:52560001-52600000	0.371462	8	12_52583027:0.371462264150943;12_52583917:0.36438679245283;12_52586873:0.366745283018868;12_52586988:0.36438679245283;12_52588129:0.310141509433962;12_52588717:0.363207547169811;12_52591804:0.365566037735849;12_52597744:0.36438679245283;	KRT80
12:52960001-53000000	0.268868	10	12_52964934:0.265330188679245;12_52965782:0.265330188679245;12_52966047:0.265330188679245;12_52966137:0.265330188679245;12_52967860:0.265330188679245;12_52969637:0.265330188679245;12_52971418:0.265330188679245;12_52978907:0.268867924528302;12_52983281:0.268867924528302;12_52992205:0.268867924528302;	KRT74,KRT72
12:53000001-53040000	0.257075	4	12_53002956:0.246462264150943;12_53013520:0.257075471698113;12_53022005:0.257075471698113;12_53022623:0.257075471698113;	KRT73,KRT2
12:54160001-54200000	0.441038	3	12_54188491:0.435141509433962;12_54195033:0.441037735849057;12_54197266:0.439858490566038;	x
12:54200001-54240000	0.445755	21	12_54202704:0.441037735849057;12_54203364:0.441037735849057;12_54210397:0.441037735849057;12_54210635:0.441037735849057;12_54214445:0.441037735849057;12_54217136:0.441037735849057;12_54217964:0.442216981132075;12_54219077:0.442216981132075;12_54221265:0.442216981132075;12_54222890:0.442216981132075;12_54228423:0.442216981132075;12_54231128:0.442216981132075;12_54233339:0.445754716981132;12_542333…	x
12:59360001-59400000	0.267689	6	12_59365414:0.233490566037736;12_59369558:0.232311320754717;12_59379529:0.232311320754717;12_59398013:0.267688679245283;12_59398256:0.267688679245283;12_59399070:0.267688679245283;	x
12:59400001-59440000	0.266509	5	12_59407154:0.266509433962264;12_59408773:0.266509433962264;12_59412267:0.209905660377358;12_59420703:0.20872641509434;12_59428667:0.212264150943396;	x
12:96000001-96040000	0.295991	3	12_96007150:0.247641509433962;12_96007582:0.247641509433962;12_96011975:0.295990566037736;	x
13:71760001-71800000	0.272406	5	13_71768134:0.272405660377358;13_71775730:0.253537735849057;13_71778767:0.253537735849057;13_71781633:0.253537735849057;13_71783098:0.255896226415094;	x
[truncated: 241 more rows]

## Sheet: Supplementary File 1e
Cis-eQTLs from U and Q95 Scan
[truncated: 2,400 more rows]

[truncated: 8 more sheets: Supplementary File 1f, Supplementary File 1g, Supplementary File 1h, Supplementary File 1i, Supplementary File 1j, Supplementary File 1k, Supplementary File 1l, Supplementary File 1m]
